# Supplementary material for: Functional analysis of two sterol regulatory element binding proteins in Penicillium digitatum
Source: PubMed Central journal article supplement (PMC5415137; doi:10.1371/journal.pone.0176485), 2017-05-03
Supplement: pone.0176485.s001.pdf [file pone.0176485.s001.pdf]

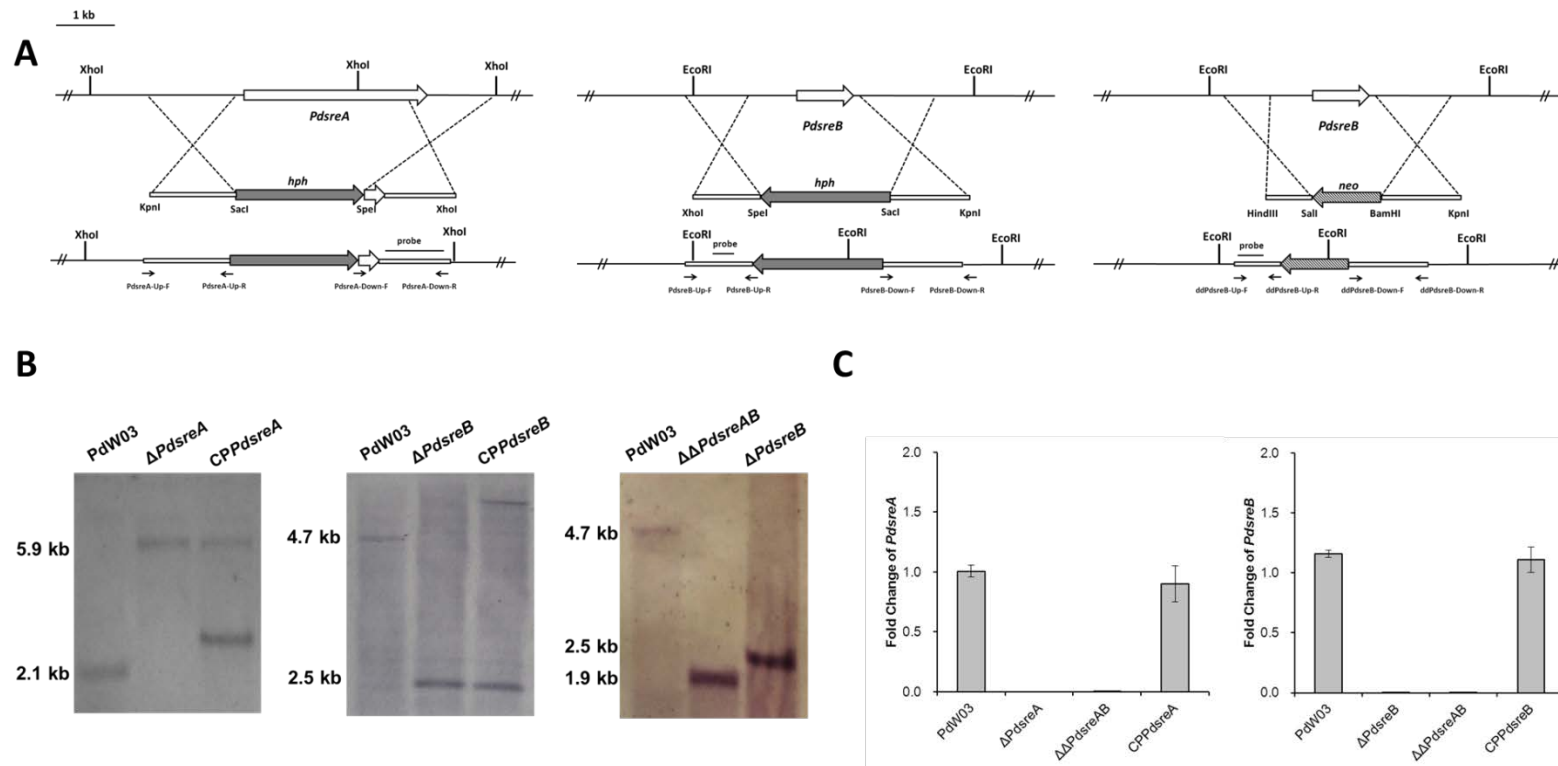

**S1 Fig. Construction and identification of  $\Delta PdsreA$ ,  $\Delta PdsreB$  and  $\Delta\Delta PdsreAB$ .** (A) The homologous gene recombination strategy. (B) Southern blot analysis. The size of DNA standards is indicated on the left of the blot. (C) qRT-PCR analysis of gene deletion mutants and complementation strains.
