# Supplementary material for: Functional analysis of two sterol regulatory element binding proteins in Penicillium digitatum
Source: PubMed Central journal article supplement (PMC5415137; doi:10.1371/journal.pone.0176485), 2017-05-03
Supplement: pone.0176485.s003.pdf [file pone.0176485.s003.pdf]

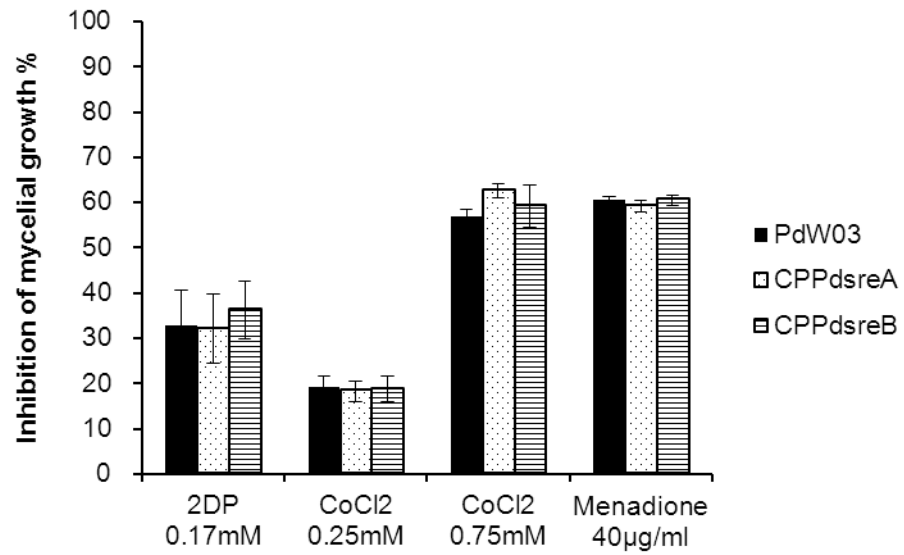

**S3 Fig. Sensitivity of the wild-type PdW03 and the complementation strains to 2DP, CoCl<sub>2</sub> and menadione.**
