# Supplementary material for: Functional analysis of two sterol regulatory element binding proteins in Penicillium digitatum
Source: PubMed Central journal article supplement (PMC5415137; doi:10.1371/journal.pone.0176485), 2017-05-03
Supplement: pone.0176485.s004.pdf [file pone.0176485.s004.pdf]

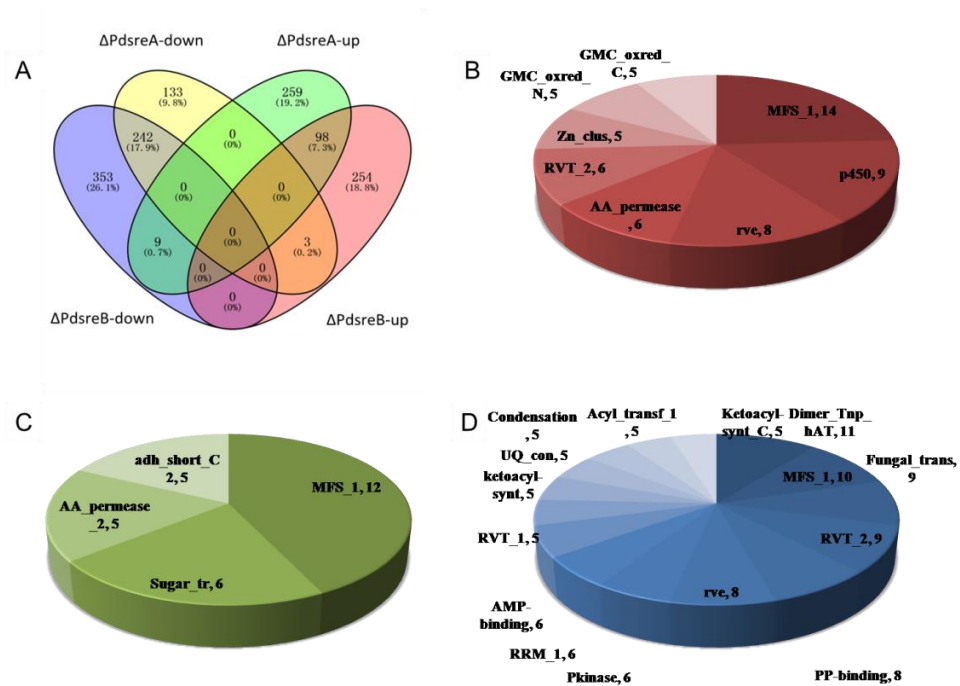

**S4 Fig. The common and discrepant regulation of *PdsreA* and *PdsreB* on gene expression in *P. digitatum*.** (A) Venn diagram showing the common and discrepant regulated genes in  $\Delta PdsreA$  and  $\Delta PdsreB$  mutants. (B) The top 8 protein domains with the highest frequency (>5) in the proteins commonly regulated by *PdsreA* and *PdsreB*. (C) The top 4 protein domains with the highest frequency (>5) in the *PdsreA* uniquely regulated proteins. (D) The top 15 protein domains with the highest frequency (>5) in the *PdsreB*-uniquely-regulated proteins. The number of proteins included in the respective family is indicated.
