# Supplementary material for: Functional analysis of two sterol regulatory element binding proteins in Penicillium digitatum
Source: PubMed Central journal article supplement (PMC5415137; doi:10.1371/journal.pone.0176485), 2017-05-03
Supplement: pone.0176485.s005.pdf [file pone.0176485.s005.pdf]

**S1 Table. Primers used in this study**

| Primer code | Primer           | Sequence (5'-3') <sup>a</sup>  | Relevant characteristics                                                                                        |
|-------------|------------------|--------------------------------|-----------------------------------------------------------------------------------------------------------------|
| P1          | PdsreA_Up-F      | GACTAGTCGCCGAAATGCCTACACC      | PCR primers to amplify <i>PdsreA</i> upstream fragment for the construction of <i>PdsreA</i> deletion plasmid   |
| P2          | PdsreA_Up-R      | CCGCTCGAGCGGTGACTACAGGCCAGGAGA |                                                                                                                 |
| P3          | PdsreA_Down-F    | GGGGTACCCCTTTGTCGCGAGTTCTTA    | PCR primers to amplify <i>PdsreA</i> downstream fragment for the construction of <i>PdsreA</i> deletion plasmid |
| P4          | PdsreA_Down-R    | CGAGCTCGTGGATGAAGCTCAACAAG     |                                                                                                                 |
| P5          | PdsreB_Up-F:     | CCGCTCGAGAATGCGGAAGTGTTGACC    | PCR primers to amplify <i>PdsreB</i> upstream fragment for the construction of <i>PdsreB</i> deletion plasmid   |
| P6          | PdsreB_Up-R      | GACTAGTAGCGGCGATTGACAGATA      |                                                                                                                 |
| P7          | PdsreB_Down-F    | CGAGCTCTTTGTGGGTGGGAGGAGG      | PCR primers to amplify <i>PdsreB</i> downstream fragment for the construction of <i>PdsreB</i> deletion plasmid |
| P8          | PdsreB_Down-R    | GGGGTACCGGTATGGCGGGATAGTCA     |                                                                                                                 |
| P9          | ddPdsreB_Up-F    | CCC AAGCTTGGCAGAACTTGACAGCAT   | PCR primers to amplify <i>PdsreB</i> upstream fragment for the construction of double deletion plasmid          |
| P10         | ddPdsreB_Up-R    | ACGCGTTCGACGGTGAAGCCAATCCCATC  |                                                                                                                 |
| P11         | ddPdsreB_Down-F  | CGGGATCCTTTGTGGGTGGGAGGAGG     | PCR primers to amplify <i>PdsreB</i> downstream fragment for the construction of double deletion plasmid        |
| P12         | ddPdsreB_Down-R  | GGGGTACCGTTTTGCTGGCAGTCGTG     |                                                                                                                 |
| P13         | PdSreA_in-F      | GAAGCGAAAGACGAGCAG             | PCR primers for identification of <i>PdsreA</i> deletion transformants                                          |
| P14         | PdSreA_in-R      | GCAAGGGCACCTAGCATAT            |                                                                                                                 |
| P15         | PdsreA_uphphup-F | GTCCTTGCAGCACTAAATT            |                                                                                                                 |
| P16         | PdsreA_uphphup-R | TCGCCAACATCTTCTTCT             |                                                                                                                 |
| P17         | PdsreA_hphDD-F   | ACCCGCTCGTCTGGCTAA             |                                                                                                                 |
| P18         | PdsreA_hphDD-R   | CGCTCGGTTGAGTGGTGA             |                                                                                                                 |
| P19         | PdsreB_in-F      | CTTCAGTGACCCATTTGC             | PCR primers for identification of <i>PdsreB</i> deletion transformants                                          |
| P20         | PdsreB_in-R      | TCTCCTGCTGGATACCAT             |                                                                                                                 |
| P21         | PdsreB_uphphup-F | GGGCTTTACTTTCTTCCA             |                                                                                                                 |

|     |                    |                                 |                                                                                                     |
|-----|--------------------|---------------------------------|-----------------------------------------------------------------------------------------------------|
| P22 | PdsreB_uphphup-R   | TTTCGGGTTTACCTCTTC              |                                                                                                     |
| P23 | PdsreB_hphDD-F     | AACCCGCTCGTCTGGCTAA             |                                                                                                     |
| P24 | PdsreB_hphDD-R     | TCCCTCCAAACTTGAGTAGAAC          |                                                                                                     |
| P25 | ddPdsreB_upNeoup-F | TAGTGCCACGCCTCAACC              |                                                                                                     |
| P26 | ddPdsreB_upNeoup-R | TGCCGAGAAAGTATCCATCA            | PCR primers for identification of double deletion transformants                                     |
| P27 | ddPdsreB_NeoDD-F   | TATCACGGGTAGCCAACG              |                                                                                                     |
| P28 | ddPdsreB_NeoDD-R   | TCCCTCCAAACTTGAGTAGAAC          |                                                                                                     |
| P29 | CPSreA-F           | CCAAGCTTGGCGCCAAGACATTGTGCGACAA | PCR primers to amplify full-length of PdsreA for the construction of PdsreA complementation plasmid |
| P30 | CPSreA-R           | GGGGTACCCTGGCTCTACAACCTAGAGATC  |                                                                                                     |
| P31 | CPSreB-F           | CCCAGCTTAGGGTGGATGACAGGTGA      | PCR primers to amplify full-length of PdsreB for the construction of PdsreB complementation plasmid |
| P32 | CPSreB-R           | CGAGCTCCTGCCCGCTGTAGTTAGT       |                                                                                                     |
| P33 | qCYP51A-F          | CGCTTCTCGAGCCAAATACG            | PCR primers for amplification of <i>CYP51A</i> gene for the expression levels analysis              |
| P34 | qCYP51A-R          | CAGGCCGTATTTGATGAACTTCTT        |                                                                                                     |
| P35 | qCYP51B-F          | CACCCAAAGTCGTGCAAAGTAT          | PCR primers for amplification of <i>CYP51B</i> gene for the expression levels analysis              |
| P36 | qCYP51B-R          | TTGACAAACTTCTTCTGCTCCA          |                                                                                                     |
| P37 | q2-actin-R         | CCGCCAGACTCAAGACCAAGAAC         | PCR primers for amplification of <i>actin</i> gene for the expression levels analysis               |
| P38 | q2-actin-F         | TCCACTACTGCCGAGCGTGAAAT         |                                                                                                     |
| P39 | q-ERG1-F           | CAATATCCTCGCACAGGC              | PCR primers for amplification of <i>ERG1</i> gene for the expression levels analysis                |
| P40 | q-ERG1-R           | CAGATGAGAACCCAAATAGAAA          |                                                                                                     |
| P41 | q-ERG6-F           | AGGCAGCAGTGGATGAGT              | PCR primers for amplification of <i>ERG6</i> gene for the expression levels analysis                |
| P42 | q-ERG6-R           | AAATGGAAGGAGGAACCC              |                                                                                                     |
| P43 | q-ERG24-F          | CTATGTCGTGGGCTTACTG             | PCR primers for amplification of <i>ERG24</i> gene for the expression levels analysis               |
| P44 | q-ERG24-R          | CTTCTTCTCGCACTTCTCC             |                                                                                                     |
| P45 | q-ERG2-F           | TTTCTTCTCCGCCGTCTA              | PCR primers for amplification of <i>ERG2</i> gene for the expression levels analysis                |
| P46 | q-ERG2-R           | TTGAATACCCACTCCTCCTG            |                                                                                                     |

|     |             |                        |                                                             |
|-----|-------------|------------------------|-------------------------------------------------------------|
| P47 | q- ERG5-F   | ACCTGAAAGTCCGCAACG     | PCR primers for amplification of <i>ERG5</i> gene for the   |
| P48 | q- ERG5-R   | GGTAAGCCTCCTCATCGTG    | expression levels analysis                                  |
| P49 | q-ERG25-F   | GCCTGGTATGCTTGGATG     | PCR primers for amplification of <i>ERG25</i> gene for the  |
| P50 | q-ERG25-R   | AGCGATGGGACCTTGTTA     | expression levels analysis                                  |
| P51 | q-ERG3-F    | TTCCTGATTACTTGGCTGTT   | PCR primers for amplification of <i>ERG3</i> gene for the   |
| P52 | q-ERG3-R    | GGCGGTGTCGTAGAGTTT     | expression levels analysis                                  |
| P53 | qPdsreA-F   | CACCGAACGATCCACAGG     | PCR primers for amplification of <i>PdsreA</i> gene for the |
| P54 | qPdsreA-R   | TGATAGACAGACGAGAACCC   | expression levels analysis                                  |
| P55 | qPdSreB-F   | CTGGGATTAGTGGCTTTT     | PCR primers for amplification of <i>PdsreB</i> gene for the |
| P56 | qPdSreB-R   | GTTTGGTCGTCACTTTCG     | expression levels analysis                                  |
| P57 | qPderg4A-F  | CAGGAGATATCAAGGGTG     | PCR primers for amplification of <i>ERG4A</i> gene for the  |
| P58 | qPderg4A-R  | TGGTAATAGCTGGATCATAAC  | expression levels analysis                                  |
| P59 | qPderg4B-F  | GAGACGGGCGATGTGATT     | PCR primers for amplification of <i>ERG4B</i> gene for the  |
| P60 | qPderg4B-R  | CGGCGAAGAAGACAGGAT     | expression levels analysis                                  |
| P61 | qPderg7-F   | GCAGGAGTCGATTGAGGG     | PCR primers for amplification of <i>ERG7 gene for the</i>   |
| P62 | qPderg7-R   | TCTGTATTGCCGAAC TTCTTA | <i>expression levels analysis</i>                           |
| P63 | qPderg8-F   | AATAATAACCGCAAGGAAGC   | PCR primers for amplification of <i>ERG8</i> gene for the   |
| P64 | qPderg8-R   | GCGTGTTTCGCTGAATAAGG   | expression levels analysis                                  |
| P65 | qPderg9-F   | CTGCGGACAGATCGAGAA     | PCR primers for amplification of <i>ERG9</i> gene for the   |
| P66 | qPderg9-R   | ACAACGCCATAAGAGCC      | expression levels analysis                                  |
| P67 | qPderg10A-F | GCTGTTATCAAAGCCAACG    | PCR primers for amplification of <i>ERG10A</i> gene for the |
| P68 | qPderg10A-R | GGAGCAAGGTGACGAGGA     | expression levels analysis                                  |
| P69 | qPderg10B-F | CTTTCGACTACGAGATTGCC   | PCR primers for amplification of <i>ERG37 gene for the</i>  |
| P70 | qPderg10B-R | CGGAGCTTCTCAGGGTTG     | <i>expression levels analysis</i>                           |
| P71 | qPderg12-F  | TGCTCTGCACAGCGTTTA     | PCR primers for amplification of <i>ERG12</i> gene for the  |
| P72 | qPderg12-R  | AGGAAGCCGTGGTTGATA     | expression levels analysis                                  |

|     |            |                      |                                                                                       |
|-----|------------|----------------------|---------------------------------------------------------------------------------------|
| P73 | qPderg13-F | AGTCCTACGCTCGTATGCT  | PCR primers for amplification of <i>ERG13</i> gene for the expression levels analysis |
| P74 | qPderg13-R | TGGAGACCAGGGTTCACA   |                                                                                       |
| P75 | qPderg20-F | CCTGGATGCTTCTTATGG   | PCR primers for amplification of <i>ERG20</i> gene for the expression levels analysis |
| P76 | qPderg20-R | ACTTCCTTCTTCAGACCCT  |                                                                                       |
| P77 | qPderg26-F | CGTGCTATGTGGGCTTTG   | PCR primers for amplification of <i>ERG26</i> gene for the expression levels analysis |
| P78 | qPderg26-R | ACTGTCCGGGCAGTGAGA   |                                                                                       |
| P79 | qPderg27-F | GCCGTTTCTACTGAGGTCG  | PCR primers for amplification of <i>ERG27</i> gene for the expression levels analysis |
| P80 | qPderg27-R | TCTTCCCTCTTGTCTTTGGT |                                                                                       |
| P81 | qPdhmg1-F  | CAACGCTCATGCCTCTAA   | PCR primers for amplification of <i>hmg1</i> gene for the expression levels analysis  |
| P82 | qPdhmg1-R  | CAATGGTCCCACCTCAAT   |                                                                                       |
| P83 | qPdhyd1-F  | GCGACCAGTTTGTGTTGAC  | PCR primers for amplification of <i>hyd1</i> gene for the expression levels analysis  |
| P84 | qPdhyd1-R  | GATGGTGGAGATACTGTGG  |                                                                                       |
| P85 | qPdidi1-F  | GGGCATCAAGGCAGAGCA   | PCR primers for amplification of <i>idi1</i> gene for the expression levels analysis  |
| P86 | qPdidi1-R  | TCGGCTGAGACGTAGGTTGT |                                                                                       |
| P87 | qPdmvd1-F  | CGTCAGTGCCGAGAAGAA   | PCR primers for amplification of <i>mvd1</i> gene for the expression levels analysis  |
| P88 | qPdmvd1-R  | AGTTGCGGGTTTGAATGG   |                                                                                       |
| P89 | qPdsm1-F   | TTCGTCACGCAAGATTCA   | PCR primers for amplification of <i>smt1</i> gene for the expression levels analysis  |
| P90 | qPdsm1-R   | GGGTAGATCCTGGCACAGA  |                                                                                       |

<sup>a</sup>The respective restriction enzyme sites included in primers are listed in lowercase in the sequence.
