# Supplementary material for: Functional analysis of two sterol regulatory element binding proteins in Penicillium digitatum
Source: PubMed Central journal article supplement (PMC5415137; doi:10.1371/journal.pone.0176485), 2017-05-03
Supplement: pone.0176485.s006.pdf [file pone.0176485.s006.pdf]

**S2 Table. Annotation of genes commonly up-regulated or down-regulated in all three mutants**

| ID                                                                                    | log2FC in $\Delta$ PdsreA | log2FC in $\Delta$ PdsreB | log2FC in $\Delta$ PdsreAB | nr_annotation                                                                           |
|---------------------------------------------------------------------------------------|---------------------------|---------------------------|----------------------------|-----------------------------------------------------------------------------------------|
| 47 common elements in " $\Delta$ PdsreA", " $\Delta$ PdsreB" and " $\Delta$ PdsreAB": |                           |                           |                            |                                                                                         |
| PDIG_22810                                                                            | 8.28                      | 8.49                      | 5.40                       | Triacylglycerol lipase (LipA), putative [Penicillium digitatum PHI26]                   |
| PDIG_84400                                                                            | 7.58                      | 2.65                      | 4.00                       | hypothetical protein PDIG_84400 [Penicillium digitatum PHI26]                           |
| PDIG_54620                                                                            | 7.43                      | 8.52                      | 2.20                       | 2,4-dihydroxyhept-2-ene-1,7-dioic acid aldolase, putative [Penicillium digitatum PHI26] |
| PDIG_54640                                                                            | 7.34                      | 8.27                      | 1.84                       | Gibberellin 3-beta hydroxylase, putative [Penicillium digitatum PHI26]                  |
| PDIG_65980                                                                            | 7.05                      | 4.45                      | 6.47                       | hypothetical protein PDIG_33240 [Penicillium digitatum PHI26]                           |
| PDIG_54630                                                                            | 6.55                      | 8.09                      | 2.24                       | hypothetical protein PDIG_54630 [Penicillium digitatum PHI26]                           |
| PDIG_46550                                                                            | 6.25                      | 3.79                      | 1.69                       | Formate dehydrogenase [Penicillium digitatum PHI26]                                     |
| PDIG_35500                                                                            | 4.99                      | 4.28                      | 2.51                       | Catalase [Penicillium digitatum PHI26]                                                  |
| PDIG_48410                                                                            | 4.43                      | 4.69                      | 1.78                       | putative pectin lyase 2 [Penicillium digitatum]                                         |
| PDIG_03520                                                                            | 4.35                      | 2.35                      | 2.12                       | hypothetical protein PDIG_03520 [Penicillium digitatum PHI26]                           |
| PDIG_91100                                                                            | 4.22                      | 3.91                      | 2.51                       | L-asparaginase [Penicillium digitatum PHI26]                                            |
| PDIG_00830                                                                            | 4.13                      | 3.56                      | 2.08                       | MFS monosaccharide transporter, putative [Penicillium digitatum PHI26]                  |
| PDIG_50400                                                                            | 4.09                      | 3.54                      | 1.39                       | Adenosine deaminase [Penicillium digitatum PHI26]                                       |
| PDIG_36540                                                                            | 3.74                      | 3.14                      | 1.64                       | Purine nucleoside permease, putative [Penicillium digitatum Pd1]                        |
| PDIG_51490                                                                            | 3.61                      | 4.04                      | 2.49                       | hypothetical protein PDIG_51490 [Penicillium digitatum PHI26]                           |
| PDIG_01900                                                                            | 3.06                      | 1.73                      | 2.31                       | Asparagine synthetase Asn2, putative [Penicillium digitatum PHI26]                      |
| PDIG_51150                                                                            | 3.05                      | 4.00                      | 1.69                       | Glycosyl hydrolase, putative [Penicillium digitatum PHI26]                              |
| PDIG_90800                                                                            | 3.04                      | 3.13                      | 2.42                       | Cellobiose dehydrogenase [Penicillium digitatum PHI26]                                  |
| PDIG_30080                                                                            | 2.95                      | 2.69                      | 1.54                       | RecName: Full=Polygalacturonase; Short=PG; AltName: Full=Pectinase; Flags: Precursor    |
| PDIG_36670                                                                            | 2.79                      | 2.33                      | 1.36                       | Formaldehyde dehydrogenase [Penicillium digitatum Pd1]                                  |
| PDIG_60720                                                                            | 2.53                      | 2.03                      | 1.66                       | hypothetical protein PDIP_70150 [Penicillium digitatum Pd1]                             |

|            |      |      |      |                                                                                        |
|------------|------|------|------|----------------------------------------------------------------------------------------|
| PDIG_65660 | 2.27 | 2.39 | 1.50 | Dihydrodipicolinate synthetase family protein [Penicillium digitatum Pd1]              |
| PDIG_81110 | 2.26 | 1.78 | 1.37 | 2OG-Fe(II) oxygenase superfamily protein [Aspergillus kawachii IFO 4308]               |
| PDIG_02310 | 2.20 | 1.79 | 1.45 | NADP-specific glutamate dehydrogenase [Penicillium digitatum PHI26]                    |
| PDIG_05470 | 2.06 | 1.92 | 1.40 | Naphthalene 1,2-dioxygenase subunit alpha [Penicillium digitatum PHI26]                |
| PDIG_23250 | 2.05 | 2.58 | 1.76 | Pc13g06590 [Penicillium chrysogenum Wisconsin 54-1255]                                 |
| PDIG_81860 | 2.04 | 3.03 | 1.75 | hypothetical protein PDIG_81860 [Penicillium digitatum PHI26]                          |
| PDIG_88030 | 1.95 | 1.67 | 2.49 | hypothetical protein PDIG_88030 [Penicillium digitatum PHI26]                          |
| PDIG_04480 | 1.94 | 2.18 | 4.19 | Dihydrofolate reductase [Penicillium digitatum PHI26]                                  |
| PDIG_20080 | 1.88 | 2.46 | 1.70 | Pc20g07470 [Penicillium chrysogenum Wisconsin 54-1255]                                 |
| PDIG_29700 | 1.87 | 4.03 | 4.25 | hypothetical protein PDIG_29700 [Penicillium digitatum PHI26]                          |
| PDIG_91230 | 1.80 | 3.44 | 2.38 | hypothetical protein PDIG_91230 [Penicillium digitatum PHI26]                          |
| PDIG_38960 | 1.69 | 2.55 | 2.75 | hypothetical protein PDIG_38960 [Penicillium digitatum PHI26]                          |
| PDIG_32650 | 1.59 | 2.33 | 2.51 | Pyridoxine biosynthesis protein pyroA [Penicillium digitatum Pd1]                      |
| PDIG_39430 | 1.55 | 1.69 | 2.47 | Acetyltransferase [Penicillium digitatum PHI26]                                        |
| PDIG_90070 | 1.54 | 2.33 | 3.08 | Acetyltransferase, GNAT family [Penicillium digitatum PHI26]                           |
| PDIG_09590 | 1.47 | 2.35 | 1.84 | Ubiquitin conjugating enzyme (UbcF), putative [Penicillium digitatum Pd1]              |
| PDIG_26870 | 1.45 | 2.16 | 1.66 | Allergen, putative [Penicillium digitatum Pd1]                                         |
| PDIG_52870 | 1.44 | 1.61 | 1.95 | Cysteine synthase [Penicillium digitatum PHI26]                                        |
| PDIG_62090 | 1.37 | 1.99 | 1.57 | S-adenosylmethionine-dependent methyltransferase, putative [Penicillium digitatum Pd1] |
| PDIG_76470 | 1.31 | 1.67 | 2.39 | Formyltetrahydrofolate deformylase, putative [Penicillium digitatum PHI26]             |
| PDIG_67250 | 1.28 | 1.73 | 3.71 | Acetyltransferase, GNAT family [Penicillium digitatum Pd1]                             |
| PDIG_67880 | 1.23 | 3.22 | 1.92 | hypothetical protein PDIP_77180 [Penicillium digitatum Pd1]                            |
| PDIG_15430 | 1.22 | 1.97 | 1.68 | Adenylyl-sulfate kinase [Penicillium digitatum Pd1]                                    |
| PDIG_34930 | 1.20 | 1.98 | 3.35 | hypothetical protein PDIP_54490 [Penicillium digitatum Pd1]                            |
| PDIG_88120 | 1.12 | 1.74 | 2.39 | saccharopine reductase [Penicillium chrysogenum]                                       |
| PDIG_68240 | 1.10 | 2.61 | 2.09 | Profilin [Penicillium digitatum Pd1]                                                   |

---

105 common elements in " $\Delta$ PdsreA", " $\Delta$ PdsreB" and

" $\Delta$ PdsreAB":

|            |       |       |       |                                                                                                   |
|------------|-------|-------|-------|---------------------------------------------------------------------------------------------------|
| PDIG_20650 | -1.07 | -6.60 | -4.48 | Thioredoxin [Penicillium digitatum Pd1]                                                           |
| PDIG_33240 | -1.09 | -3.25 | -8.74 | hypothetical protein PDIG_33240 [Penicillium digitatum PHI26]                                     |
| PDIG_47170 | -1.13 | -5.64 | -5.96 | hypothetical protein PDIG_47170 [Penicillium digitatum PHI26]                                     |
| PDIG_87570 | -1.14 | -3.15 | -2.10 | C6 transcription factor, putative [Penicillium digitatum PHI26]                                   |
| PDIG_31060 | -1.16 | -2.73 | -1.87 | hypothetical protein PDIP_50640 [Penicillium digitatum Pd1]                                       |
| PDIG_77040 | -1.16 | -2.43 | -1.74 | hypothetical protein PDIG_77040 [Penicillium digitatum PHI26]                                     |
| PDIG_55560 | -1.17 | -2.68 | -1.67 | Hydroxamate-type ferrichrome siderophore peptide synthetase [Penicillium digitatum PHI26]         |
| PDIG_48720 | -1.17 | -2.87 | -1.95 | Alpha-1,2-mannosidase, putative [Penicillium digitatum PHI26]                                     |
| PDIG_75520 | -1.22 | -2.41 | -1.77 | Glutamate decarboxylase [Penicillium digitatum PHI26]                                             |
| PDIG_87590 | -1.22 | -3.09 | -2.27 | hypothetical protein PDIG_87590 [Penicillium digitatum PHI26]                                     |
| PDIG_14940 | -1.24 | -2.15 | -1.42 | Heat shock protein/chaperonin HSP78, putative [Penicillium digitatum PHI26]                       |
| PDIG_10200 | -1.24 | -2.49 | -1.53 | hypothetical protein PDIG_10200 [Penicillium digitatum PHI26]                                     |
| PDIG_79420 | -1.25 | -2.73 | -2.83 | hypothetical protein PDIG_79420 [Penicillium digitatum PHI26]                                     |
| PDIG_17680 | -1.27 | -1.75 | -1.43 | unnamed protein product [Aspergillus oryzae RIB40]                                                |
| PDIG_00340 | -1.30 | -2.47 | -1.79 | Serine carboxypeptidase (CpdS), putative [Penicillium digitatum Pd1]                              |
| PDIG_66400 | -1.30 | -3.73 | -3.62 | hypothetical protein PDIP_75700 [Penicillium digitatum Pd1]                                       |
| PDIG_35400 | -1.31 | -2.36 | -1.46 | Heat shock protein 90 [Penicillium digitatum Pd1]                                                 |
| PDIG_58780 | -1.32 | -3.40 | -2.01 | Heat shock protein, putative [Penicillium digitatum Pd1]                                          |
| PDIG_85070 | -1.36 | -2.05 | -1.74 | hypothetical protein PDIG_85070 [Penicillium digitatum PHI26]                                     |
| PDIG_51790 | -1.41 | -2.15 | -2.42 | Cyclin (Pc11), putative [Penicillium digitatum PHI26]                                             |
| PDIG_58230 | -1.42 | -2.92 | -1.47 | Pc14g00450 [Penicillium chrysogenum Wisconsin 54-1255]                                            |
| PDIG_74400 | -1.43 | -2.28 | -1.63 | DNA repair protein Rad50 [Penicillium digitatum PHI26]                                            |
| PDIG_52070 | -1.45 | -2.11 | -1.76 | Cytochrome P450 sterol C-22 desaturase, putative [Penicillium digitatum PHI26]                    |
| PDIG_14820 | -1.50 | -1.82 | -4.14 | C4-dicarboxylate transporter/malic acid transport protein, putative [Penicillium digitatum PHI26] |

---

|            |       |       |       |                                                                                            |
|------------|-------|-------|-------|--------------------------------------------------------------------------------------------|
| PDIG_83050 | -1.51 | -1.64 | -1.84 | hypothetical protein PDIP_86840 [Penicillium digitatum Pd1]                                |
| PDIG_09190 | -1.53 | -3.10 | -2.05 | hypothetical protein PDIP_37220 [Penicillium digitatum Pd1]                                |
| PDIG_81150 | -1.53 | -2.97 | -1.64 | hypothetical protein PDIG_81150 [Penicillium digitatum PHI26]                              |
| PDIG_79590 | -1.55 | -4.22 | -1.57 | 2,3-diketo-5-methylthio-1-phosphopentane phosphatase, putative [Penicillium digitatum Pd1] |
| PDIG_23060 | -1.55 | -2.30 | -2.91 | hypothetical protein PDIG_23060 [Penicillium digitatum PHI26]                              |
| PDIG_16880 | -1.62 | -2.10 | -1.56 | General amidase GmdB [Penicillium digitatum Pd1]                                           |
| PDIG_80130 | -1.63 | -2.51 | -2.29 | hypothetical protein PDIG_80130 [Penicillium digitatum PHI26]                              |
| PDIG_81000 | -1.65 | -3.36 | -1.80 | hypothetical protein PDIG_81000 [Penicillium digitatum PHI26]                              |
| PDIG_12700 | -1.65 | -2.89 | -2.52 | ATP citrate lyase, subunit 1, putative [Penicillium digitatum Pd1]                         |
| PDIG_74670 | -1.67 | -3.19 | -1.61 | hypothetical protein PDIG_74670 [Penicillium digitatum PHI26]                              |
| PDIG_48540 | -1.67 | -2.40 | -1.75 | MFS multidrug transporter, putative [Penicillium digitatum Pd1]                            |
| PDIG_47180 | -1.69 | -3.58 | -4.43 | hypothetical protein PDIG_47180 [Penicillium digitatum PHI26]                              |
| PDIG_85420 | -1.69 | -4.66 | -2.35 | 14-alpha sterol demethylase [Penicillium digitatum]                                        |
| PDIG_82290 | -1.69 | -2.23 | -1.32 | Choline oxidase (CodA), putative [Penicillium digitatum Pd1]                               |
| PDIG_57560 | -1.71 | -2.04 | -1.96 | Bli-3 protein, putative [Penicillium digitatum Pd1]                                        |
| PDIG_19210 | -1.71 | -2.22 | -1.67 | hypothetical protein PDIG_19210 [Penicillium digitatum PHI26]                              |
| PDIG_79580 | -1.74 | -6.00 | -3.04 | Phosphorylase [Penicillium digitatum PHI26]                                                |
| PDIG_02320 | -1.75 | -2.28 | -1.46 | Mediator of RNA polymerase II transcription subunit 5 [Penicillium digitatum PHI26]        |
| PDIG_06200 | -1.77 | -2.90 | -1.72 | autophagy protein [Aspergillus kawachii IFO 4308]                                          |
| PDIG_20480 | -1.87 | -6.71 | -4.10 | hypothetical protein PDIG_20480 [Penicillium digitatum PHI26]                              |
| PDIG_42270 | -1.90 | -2.42 | -1.49 | hypothetical protein PDIG_42270 [Penicillium digitatum PHI26]                              |
| PDIG_02990 | -1.91 | -3.78 | -1.44 | General amino acid permease (Agp2), putative [Penicillium digitatum PHI26]                 |
| PDIG_48520 | -1.92 | -4.00 | -1.81 | hypothetical protein PDIP_57890 [Penicillium digitatum Pd1]                                |
| PDIG_18320 | -1.93 | -3.39 | -2.46 | hypothetical protein PDIP_56150 [Penicillium digitatum Pd1]                                |
| PDIG_17890 | -1.94 | -3.53 | -2.86 | Pentachlorophenol 4-monooxygenase, putative [Penicillium digitatum Pd1]                    |
| PDIG_74660 | -2.02 | -4.12 | -2.32 | ABC transporter, putative [Penicillium digitatum PHI26]                                    |

|            |       |       |       |                                                                                     |
|------------|-------|-------|-------|-------------------------------------------------------------------------------------|
| PDIG_12710 | -2.09 | -1.95 | -1.34 | ATP citrate lyase subunit (Acl), putative [Penicillium digitatum Pd1]               |
| PDIG_03140 | -2.13 | -3.71 | -1.79 | hypothetical protein PDIP_41790 [Penicillium digitatum Pd1]                         |
| PDIG_47150 | -2.15 | -4.97 | -4.33 | hypothetical protein PDIG_47150 [Penicillium digitatum PHI26]                       |
| PDIG_90250 | -2.20 | -5.89 | -1.40 | Aminopeptidase [Penicillium digitatum PHI26]                                        |
| PDIG_70990 | -2.21 | -4.95 | -2.14 | hypothetical protein PDIP_80310 [Penicillium digitatum Pd1]                         |
| PDIG_86840 | -2.22 | -2.24 | -1.45 | hypothetical protein PDIG_86840 [Penicillium digitatum PHI26]                       |
| PDIG_10600 | -2.25 | -2.45 | -1.33 | Pc21g04140 [Penicillium chrysogenum Wisconsin 54-1255]                              |
| PDIG_48170 | -2.28 | -3.32 | -4.13 | hypothetical protein PDIP_57550 [Penicillium digitatum Pd1]                         |
| PDIG_63600 | -2.29 | -1.81 | -2.68 | hypothetical protein PDIG_63600 [Penicillium digitatum PHI26]                       |
| PDIG_63230 | -2.30 | -2.29 | -1.42 | hypothetical protein PDIP_72610 [Penicillium digitatum Pd1]                         |
| PDIG_21480 | -2.40 | -3.17 | -1.73 | Flavin-binding monooxygenase, putative [Penicillium digitatum PHI26]                |
| PDIG_50840 | -2.46 | -2.39 | -1.60 | 3-methyl-2-oxobutanoate hydroxymethyltransferase PanB [Penicillium digitatum PHI26] |
| PDIG_28880 | -2.53 | -4.11 | -2.58 | hypothetical protein PDIP_63320 [Penicillium digitatum Pd1]                         |
| PDIG_70870 | -2.59 | -3.43 | -1.91 | hypothetical protein PDIP_80190 [Penicillium digitatum Pd1]                         |
| PDIG_26220 | -2.62 | -4.69 | -2.54 | hypothetical protein PDIP_60700 [Penicillium digitatum Pd1]                         |
| PDIG_57930 | -2.63 | -6.04 | -1.30 | Bifunctional P450:NADPH-P450 reductase [Penicillium digitatum Pd1]                  |
| PDIG_43010 | -2.67 | -3.17 | -2.89 | hypothetical protein PDIG_43010 [Penicillium digitatum PHI26]                       |
| PDIG_58080 | -2.71 | -3.73 | -2.06 | Alpha,alpha-trehalose glucohydrolase TreA/Ath1 [Penicillium digitatum Pd1]          |
| PDIG_16190 | -2.72 | -4.90 | -2.66 | Fatty acid synthase subunit alpha, putative [Penicillium digitatum Pd1]             |
| PDIG_32750 | -2.73 | -6.85 | -3.07 | hypothetical protein PDIG_32750 [Penicillium digitatum PHI26]                       |
| PDIG_15450 | -2.76 | -2.85 | -2.43 | hypothetical protein PDIG_15450 [Penicillium digitatum PHI26]                       |
| PDIG_03410 | -2.88 | -3.57 | -4.29 | hypothetical protein PDIG_03410 [Penicillium digitatum PHI26]                       |
| PDIG_22270 | -2.89 | -3.58 | -2.00 | hypothetical protein PDIG_22270 [Penicillium digitatum PHI26]                       |
| PDIG_81790 | -2.89 | -7.58 | -1.54 | hypothetical protein PDIG_81790 [Penicillium digitatum PHI26]                       |
| PDIG_70830 | -2.91 | -4.45 | -5.06 | cytochrome P-450 14DM [Penicillium digitatum]                                       |
| PDIG_24590 | -2.98 | -3.68 | -1.85 | hypothetical protein PDIG_24590 [Penicillium digitatum PHI26]                       |

|            |       |       |       |                                                                                              |
|------------|-------|-------|-------|----------------------------------------------------------------------------------------------|
| PDIG_21490 | -3.00 | -4.92 | -1.68 | hypothetical protein PDIG_21490 [Penicillium digitatum PHI26]                                |
| PDIG_57830 | -3.01 | -4.58 | -1.69 | hypothetical protein PDIP_67340 [Penicillium digitatum Pd1]                                  |
| PDIG_75350 | -3.17 | -2.84 | -2.88 | NADPH oxidase (NoxA), putative [Penicillium digitatum PHI26]                                 |
| PDIG_00120 | -3.20 | -8.12 | -4.48 | NADP-dependent alcohol dehydrogenase [Grosmannia clavigera kw1407]                           |
| PDIG_75660 | -3.22 | -3.94 | -1.90 | Endo-1,4-beta-xylanase, putative [Penicillium digitatum PHI26]                               |
| PDIG_32950 | -3.30 | -3.85 | -3.32 | Squalene epoxidase-like protein [Penicillium digitatum Pd1]                                  |
| PDIG_16160 | -3.34 | -3.62 | -2.60 | Benzoate 4-monooxygenase cytochrome P450 [Penicillium digitatum Pd1]                         |
| PDIG_52750 | -3.49 | -2.95 | -1.79 | Metallo-beta-lactamase superfamily protein [Penicillium digitatum PHI26]                     |
| PDIG_83640 | -3.51 | -4.70 | -1.85 | MFS monocarboxylate transporter, putative [Penicillium digitatum Pd1]                        |
| PDIG_56310 | -3.52 | -3.35 | -4.07 | hypothetical protein PDIP_65870 [Penicillium digitatum Pd1]                                  |
| PDIG_68830 | -3.54 | -3.78 | -1.36 | hypothetical protein PDIP_78110 [Penicillium digitatum Pd1]                                  |
| PDIG_70500 | -3.96 | -5.31 | -4.60 | hypothetical protein PDIP_79810 [Penicillium digitatum Pd1]                                  |
| PDIG_33180 | -4.01 | -4.12 | -1.57 | hypothetical protein PDIP_52770 [Penicillium digitatum Pd1]                                  |
| PDIG_70460 | -4.02 | -3.37 | -2.47 | DNA photolyase, putative [Penicillium digitatum Pd1]                                         |
| PDIG_76380 | -4.17 | -7.02 | -3.36 | hypothetical protein PDIG_76380 [Penicillium digitatum PHI26]                                |
| PDIG_83570 | -4.18 | -6.23 | -2.39 | MFS multidrug transporter, putative [Penicillium digitatum Pd1]                              |
| PDIG_45330 | -4.27 | -3.72 | -2.51 | hypothetical protein PDIG_45330 [Penicillium digitatum PHI26]                                |
| PDIG_02350 | -4.41 | -6.45 | -1.82 | ABC transporter, putative [Penicillium digitatum PHI26]                                      |
| PDIG_16180 | -4.47 | -3.97 | -3.65 | Branched-chain amino acid aminotransferase [Penicillium digitatum Pd1]                       |
| PDIG_66050 | -4.73 | -7.73 | -3.26 | hypothetical protein PDIP_75350 [Penicillium digitatum Pd1]                                  |
| PDIG_68750 | -4.90 | -2.50 | -2.97 | Glycosyl hydrolase, putative [Penicillium digitatum Pd1]                                     |
| PDIG_42030 | -4.93 | -5.52 | -6.62 | Aspergillopepsin, putative [Penicillium digitatum PHI26]                                     |
| PDIG_01990 | -5.13 | -7.04 | -3.16 | hypothetical protein PDIG_01990 [Penicillium digitatum PHI26]                                |
| PDIG_66060 | -5.48 | -9.28 | -3.89 | hypothetical protein PDIG_66060 [Penicillium digitatum PHI26]                                |
| PDIG_64840 | -5.49 | -4.50 | -1.44 | hypothetical protein PDIP_74170 [Penicillium digitatum Pd1]                                  |
| PDIG_18140 | -6.83 | -6.52 | -6.76 | putative RNA-directed DNA polymerase from transposon X-element [Penicillium digitatum PHI26] |

---

|            |       |       |       |                                                                     |
|------------|-------|-------|-------|---------------------------------------------------------------------|
| PDIG_15540 | -6.86 | -7.22 | -3.65 | Polyamine acetyltransferase [Penicillium digitatum PHI26]           |
| PDIG_16300 | -7.43 | -7.12 | -7.36 | hypothetical protein PDIG_33240 [Penicillium digitatum PHI26]       |
| PDIG_11580 | -8.79 | -8.48 | -8.72 | Retrotransposon polyprotein, putative [Penicillium digitatum PHI26] |

---
