# Supplementary material for: Functional analysis of two sterol regulatory element binding proteins in Penicillium digitatum
Source: PubMed Central journal article supplement (PMC5415137; doi:10.1371/journal.pone.0176485), 2017-05-03
Supplement: pone.0176485.s009.pdf [file pone.0176485.s009.pdf]

**S5 Table. Annotation of genes commonly regulated by *PdsreA* and *PdsreB***

| ID                                                                             | log2FC in<br>$\Delta$ PdsreA | log2FC in<br>$\Delta$ PdsreB | Pfam family      | domain<br>name(abbreviation)  | domain name                                                                                        | nr_annotation                                                           |
|--------------------------------------------------------------------------------|------------------------------|------------------------------|------------------|-------------------------------|----------------------------------------------------------------------------------------------------|-------------------------------------------------------------------------|
| 242 common elements in " $\Delta$ PdsreA-down"<br>and " $\Delta$ PdsreB-down": |                              |                              |                  |                               |                                                                                                    |                                                                         |
| PDIG_20650                                                                     | -1.07                        | -6.60                        | PF00085,         | Thioredoxin,                  | Thioredoxin,                                                                                       | Thioredoxin                                                             |
| PDIG_22250                                                                     | -1.08                        | -1.68                        | PF05532,         | CsbD,                         | CsbD-like,                                                                                         | Mismatched base pair and cruciform<br>DNA recognition protein, putative |
| PDIG_33240                                                                     | -1.09                        | -3.25                        | PF00665,PF07727, | rve,RVT_2,                    | Integrase core domain,Reverse<br>transcriptase (RNA-dependent DNA<br>polymerase),                  | hypothetical protein PDIG_33240                                         |
| PDIG_36490                                                                     | -1.12                        | -2.03                        | PF08031,PF01565, | BBE,FAD_binding_4             | Berberine and berberine like,FAD<br>binding domain,                                                | hypothetical protein PDIP_83090                                         |
| PDIG_47170                                                                     | -1.13                        | -5.64                        | PF11917,         | DUF3435,                      | Protein of unknown function<br>(DUF3435),                                                          | hypothetical protein PDIG_47170                                         |
| PDIG_87570                                                                     | -1.14                        | -3.15                        | PF00172,PF04082, | Zn_clus,Fungal_trans          | Fungal Zn(2)-Cys(6) binuclear cluster<br>domain,Fungal specific transcription<br>factor domain,    | C6 transcription factor, putative                                       |
| PDIG_31060                                                                     | -1.16                        | -2.73                        | PF04366,         | Ysc84,                        | Las17-binding protein actin regulator,<br>Oxoglutarate and iron-dependent<br>oxygenase degradation | hypothetical protein PDIP_50640                                         |
| PDIG_77040                                                                     | -1.16                        | -2.43                        | PF10637,PF13661, | Ofd1_CTDD,2OG-Fe<br>II_Oxy_4, | C-term,2OG-Fe(II) oxygenase<br>superfamily,                                                        | hypothetical protein PDIG_77040                                         |
| PDIG_35760                                                                     | -1.16                        | -4.19                        | PF11927,         | DUF3445,                      | Protein of unknown function<br>(DUF3445),                                                          | hypothetical protein PDIG_35760                                         |

|            |       |       |                                   |                             |                                                                                                                    |                                                             |
|------------|-------|-------|-----------------------------------|-----------------------------|--------------------------------------------------------------------------------------------------------------------|-------------------------------------------------------------|
| PDIG_55560 | -1.17 | -2.68 |                                   |                             |                                                                                                                    | Hydroxamate-type ferrichrome siderophore peptide synthetase |
| PDIG_23690 | -1.17 | -2.34 | PF00117,PF06418,                  | GATase,CTP_synth_ N,        | Glutamine amidotransferase class-I,CTP synthase N-terminus,                                                        | CTP synthase, putative                                      |
| PDIG_48720 | -1.17 | -2.87 | PF07971,                          | Glyco_hydro_92,             | Glycosyl hydrolase family 92,                                                                                      | Alpha-1,2-mannosidase, putative                             |
| PDIG_34840 | -1.18 | -2.08 | PF13577,                          | SnoaL_4,                    | SnoaL-like domain, haloacid dehalogenase-like                                                                      | hypothetical protein PDIP_54410                             |
| PDIG_72950 | -1.19 | -1.70 | PF00702,PF00403, PF00122,         | Hydrolase,HMA,E1-E2_ATPase, | hydrolase,Heavy-metal-associated domain,E1-E2 ATPase,                                                              | Copper-transporting ATPase, putative                        |
| PDIG_39610 | -1.20 | -1.95 | PF00005,PF00664,                  | ABC_tran,ABC_me mbrane,     | ABC transporter,ABC transporter transmembrane region,                                                              | hypothetical protein PDIG_39610                             |
| PDIG_75300 | -1.21 | -1.84 | PF00621,                          | RhoGEF,                     | RhoGEF domain,                                                                                                     | Rho guanyl nucleotide exchange factor, putative             |
| PDIG_81160 | -1.21 | -3.70 |                                   |                             |                                                                                                                    | hypothetical protein PDIG_81160                             |
| PDIG_90640 | -1.21 | -1.64 | PF00168,                          | C2,                         | C2 domain, FAD dependent oxidoreductase,Glycine cleavage T-protein C-terminal barrel domain,Aminomethyltransferase | putative serine proline-rich protein                        |
| PDIG_38250 | -1.22 | -3.09 | PF01266,PF08669, PF01571,PF16350, | DAO,GCV_T_C,GC V_T,FAO_M,   | folate-binding domain,FAD dependent oxidoreductase central domain,                                                 | N,N-dimethylglycine oxidase, putative                       |
| PDIG_08230 | -1.22 | -3.54 | PF05592,                          | Bac_rhamnosid,              | Bacterial alpha-L-rhamnosidase, Pyridoxal-dependent decarboxylase                                                  | Alpha-L-rhamnosidase A, putative                            |
| PDIG_75520 | -1.22 | -2.41 | PF00282,                          | Pyridoxal_deC,              | conserved domain,                                                                                                  | Glutamate decarboxylase                                     |
| PDIG_87590 | -1.22 | -3.09 | PF00168,                          | C2,                         | C2 domain,                                                                                                         | hypothetical protein PDIG_87590                             |

|            |       |       |                           |                                                                       |                                                                                                                                                            |                                                                                     |
|------------|-------|-------|---------------------------|-----------------------------------------------------------------------|------------------------------------------------------------------------------------------------------------------------------------------------------------|-------------------------------------------------------------------------------------|
|            |       |       |                           |                                                                       | ATPase family associated with various cellular activities (AAA),C-terminal, D2-small domain, of ClpB                                                       |                                                                                     |
| PDIG_14940 | -1.24 | -2.15 | PF00004,PF10431, PF07724, | AAA,ClpB_D2-small ,AAA_2,                                             | protein,AAA domain (Cdc48 subfamily),                                                                                                                      | Heat shock protein/chaperonin HSP78, putative                                       |
| PDIG_10200 | -1.24 | -2.49 | PF05383,                  | La,                                                                   | La domain,                                                                                                                                                 | hypothetical protein PDIG_10200                                                     |
| PDIG_41180 | -1.24 | -1.98 | PF00388,                  | PI-PLC-X,                                                             | Phosphatidylinositol-specific phospholipase C, X domain,                                                                                                   | Phosphatidylinositol phospholipase C                                                |
| PDIG_79420 | -1.25 | -2.73 |                           |                                                                       |                                                                                                                                                            | hypothetical protein PDIG_79420                                                     |
| PDIG_78570 | -1.26 | -2.15 | PF00012,                  | HSP70,                                                                | Hsp70 protein,                                                                                                                                             | Heat shock protein Hsp88, putative                                                  |
|            |       |       |                           |                                                                       | WD domain, G-beta repeat,Utp21 specific WD40 associated putative domain,                                                                                   |                                                                                     |
| PDIG_58530 | -1.26 | -1.73 | PF00400,PF04192,          | WD40,Utp21,                                                           | Reverse transcriptase (RNA-dependent DNA polymerase),                                                                                                      | SnoRNA binding protein, putative unnamed protein product [Aspergillus oryzae RIB40] |
| PDIG_17680 | -1.27 | -1.75 | PF00078,                  | RVT_1,                                                                | MatE,                                                                                                                                                      | hypothetical protein PDIG_42350                                                     |
| PDIG_42350 | -1.27 | -3.05 | PF01554,                  | MatE,                                                                 | MatE,                                                                                                                                                      | Pc22g00960 [Penicillium chrysogenum Wisconsin 54-1255]                              |
| PDIG_75530 | -1.28 | -2.92 | PF16177,PF00501,          | ACAS_N,AMP-binding,                                                   | Acetyl-coenzyme A synthetase N-terminus,AMP-binding enzyme,                                                                                                | hypothetical protein PDIG_87970                                                     |
| PDIG_87970 | -1.29 | -1.97 | PF00096,                  | zf-C2H2,                                                              | Zinc finger, C2H2 type,                                                                                                                                    |                                                                                     |
|            |       |       |                           | RNA_pol_Rpb1_2, RNA_pol_Rpb1_1, RNA_pol_Rpb1_5, RNA_pol_Rpb1_4, RNA_p | RNA polymerase Rpb1, domain 2, RNA polymerase Rpb1, domain 1, RNA polymerase Rpb1, domain 5, RNA polymerase Rpb1, domain 4, RNA polymerase Rpb1, domain 3, |                                                                                     |
| PDIG_57720 | -1.29 | -1.88 | PF04983,                  | ol_Rpb1_3,                                                            |                                                                                                                                                            | DNA-directed RNA polymerase                                                         |
| PDIG_38440 | -1.29 | -2.39 | PF07690,                  | MFS_1,                                                                | Major Facilitator Superfamily,                                                                                                                             | MFS allantate transporter, putative                                                 |

|            |       |       |                              |                                                   |                                                                                                                                                                                                                                                                                                                                     |                                                                         |
|------------|-------|-------|------------------------------|---------------------------------------------------|-------------------------------------------------------------------------------------------------------------------------------------------------------------------------------------------------------------------------------------------------------------------------------------------------------------------------------------|-------------------------------------------------------------------------|
| PDIG_00340 | -1.30 | -2.47 | PF00450,                     | Peptidase_S10,                                    | Serine carboxypeptidase,<br>Cys/Met metabolism PLP-dependent<br>enzyme,                                                                                                                                                                                                                                                             | Serine carboxypeptidase (CpdS),<br>putative [Penicillium digitatum Pd1] |
| PDIG_26630 | -1.30 | -1.64 | PF01053,                     | Cys_Met_Meta_PP,                                  |                                                                                                                                                                                                                                                                                                                                     | Cystathionine gamma-lyase                                               |
| PDIG_66400 | -1.30 | -3.73 |                              |                                                   |                                                                                                                                                                                                                                                                                                                                     | hypothetical protein PDIP_75700                                         |
| PDIG_35400 | -1.31 | -2.36 | PF00183,PF02518,             | HSP90,HATPase_c,                                  | Hsp90 protein,Histidine kinase-, DNA<br>gyrase B-, and HSP90-like ATPase,                                                                                                                                                                                                                                                           | Heat shock protein 90                                                   |
| PDIG_14980 | -1.31 | -1.77 |                              |                                                   |                                                                                                                                                                                                                                                                                                                                     | hypothetical protein PDIG_14980                                         |
| PDIG_63550 | -1.31 | -1.73 | PF02129,PF08530,             | Peptidase_S15,PepX<br>_C,                         | X-Pro dipeptidyl-peptidase (S15<br>family),X-Pro dipeptidyl-peptidase<br>C-terminal non-catalytic domain,<br>Elongation factor Tu GTP binding<br>domain,Elongation factor G<br>C-terminus,Elongation factor G,<br>domain IV,116 kDa U5 small nuclear<br>ribonucleoprotein component<br>N-terminus,Elongation factor Tu<br>domain 2, | Hydrolase, CocE/NonD family,<br>putative                                |
| PDIG_82180 | -1.32 | -1.58 | PF03144,                     | GTP_EFTU,EFG_C,<br>EFG_IV,EFTUD2,G<br>TP_EFTU_D2, |                                                                                                                                                                                                                                                                                                                                     | U5 snRNP component Snu114,<br>putative                                  |
| PDIG_58780 | -1.32 | -3.40 | PF00011,                     | HSP20,                                            | Hsp20/alpha crystallin family,                                                                                                                                                                                                                                                                                                      | Heat shock protein, putative                                            |
| PDIG_36520 | -1.33 | -3.01 | PF01494,                     | FAD_binding_3,                                    | FAD binding domain,<br>Phosphopantetheine attachment<br>site,Condensation                                                                                                                                                                                                                                                           | Salicylate hydroxylase                                                  |
| PDIG_41980 | -1.33 | -3.56 | PF00550,PF00668,<br>PF00501, | PP-binding,Condensa<br>tion,AMP-binding,          | domain,AMP-binding enzyme,                                                                                                                                                                                                                                                                                                          | Nonribosomal peptide synthase<br>Pes1                                   |
| PDIG_08590 | -1.34 | -2.46 | PF00083,                     | Sugar_tr,                                         | Sugar (and other) transporter,                                                                                                                                                                                                                                                                                                      | MFS phospholipid transporter<br>(Git1), putative                        |
| PDIG_39740 | -1.36 | -1.83 |                              |                                                   |                                                                                                                                                                                                                                                                                                                                     | hypothetical protein PDIG_39740                                         |

|            |       |       |                                                             |                                                                        |                                                                                                                                                                                                                                                                                                                                                                               |                                                                  |
|------------|-------|-------|-------------------------------------------------------------|------------------------------------------------------------------------|-------------------------------------------------------------------------------------------------------------------------------------------------------------------------------------------------------------------------------------------------------------------------------------------------------------------------------------------------------------------------------|------------------------------------------------------------------|
| PDIG_85070 | -1.36 | -2.05 |                                                             |                                                                        | Carbamoyl-phosphate synthetase large chain, oligomerisation domain,Carbamoyl-phosphate synthase small chain, CPSase domain,Glutamine amidotransferase class-I,MGS-like domain,Aspartate/ornithine carbamoyltransferase, Asp/Orn binding domain,Aspartate/ornithine carbamoyltransferase, carbamoyl-P binding domain,Carbamoyl-phosphate synthase L chain, ATP binding domain, | hypothetical protein PDIG_85070                                  |
| PDIG_14100 | -1.36 | -1.97 | PF02787,PF00988, PF00117,PF02142, PF00185,PF02729, PF02786, | CPSase_L_D3,CPSase_e_sm_chain,GATase, MGS,OTCace,OTCace_N,CPSase_L_D2, |                                                                                                                                                                                                                                                                                                                                                                               | Bifunctional pyrimidine biosynthesis protein (PyrABCN), putative |
| PDIG_83130 | -1.38 | -1.75 | PF00067,                                                    | p450,                                                                  | Cytochrome P450, Pyridoxal-dependent decarboxylase conserved domain,                                                                                                                                                                                                                                                                                                          | hypothetical protein PDIP_86910                                  |
| PDIG_06490 | -1.39 | -4.76 | PF00282,                                                    | Pyridoxal_deC,                                                         |                                                                                                                                                                                                                                                                                                                                                                               | hypothetical protein PDIG_06490                                  |
| PDIG_31010 | -1.39 | -2.28 | PF00226,PF01556,                                            | DnaJ,DnaJ_C,                                                           | DnaJ domain,DnaJ C terminal domain,                                                                                                                                                                                                                                                                                                                                           | hypothetical protein PDIG_31010                                  |
| PDIG_31950 | -1.41 | -1.56 |                                                             |                                                                        |                                                                                                                                                                                                                                                                                                                                                                               | hypothetical protein PDIP_51530 [Penicillium digitatum Pd1]      |
| PDIG_86040 | -1.41 | -2.40 | PF03810,PF13646,                                            | IBN_N,HEAT_2,                                                          | Importin-beta N-terminal domain,HEAT repeats, Unstructured region on RNA-binding-domain protein,RNA recognition motif. (a.k.a. RRM, RBD, or RNP domain),                                                                                                                                                                                                                      | Importin beta-4 subunit, putative                                |
| PDIG_51110 | -1.41 | -2.17 | PF16651,PF00076,                                            | RRM_u2,RRM_1,                                                          |                                                                                                                                                                                                                                                                                                                                                                               | hypothetical protein PDIG_51110                                  |
| PDIG_51790 | -1.41 | -2.15 | PF00134,                                                    | Cyclin_N,                                                              | Cyclin, N-terminal domain,                                                                                                                                                                                                                                                                                                                                                    | Cyclin (Pcl1), putative                                          |
| PDIG_81780 | -1.42 | -4.05 | PF11807,                                                    | DUF3328,                                                               | Domain of unknown function                                                                                                                                                                                                                                                                                                                                                    | hypothetical protein PDIG_81780                                  |

|            |       |       |                              |                                |                                                                                   |                                                                           |
|------------|-------|-------|------------------------------|--------------------------------|-----------------------------------------------------------------------------------|---------------------------------------------------------------------------|
|            |       |       |                              |                                | (DUF3328),                                                                        |                                                                           |
| PDIG_58230 | -1.42 | -2.92 |                              |                                |                                                                                   | Pc14g00450 [Penicillium chrysogenum Wisconsin 54-1255]                    |
| PDIG_40570 | -1.43 | -2.00 |                              |                                |                                                                                   | Heat shock 70 kDa protein                                                 |
| PDIG_74400 | -1.43 | -2.28 |                              |                                |                                                                                   | DNA repair protein Rad50                                                  |
| PDIG_62370 | -1.44 | -1.81 |                              |                                |                                                                                   | hypothetical protein PDIP_71750                                           |
| PDIG_52070 | -1.45 | -2.11 | PF00067,                     | p450,                          | Cytochrome P450,<br>Protein of unknown function                                   | Cytochrome P450 sterol C-22 desaturase, putative                          |
| PDIG_72780 | -1.47 | -1.70 | PF14613,                     | DUF4449,                       | (DUF4449),                                                                        | hypothetical protein PDIG_72780                                           |
| PDIG_26600 | -1.47 | -2.95 |                              |                                |                                                                                   | hypothetical protein PDIP_61050                                           |
| PDIG_11800 | -1.47 | -3.79 |                              |                                |                                                                                   | MFS multidrug transporter, putative                                       |
| PDIG_07530 | -1.48 | -1.93 | PF00085,PF08324,<br>PF05903, | Thioredoxin,PUL,Peptidase_C97, | Thioredoxin,PUL domain,PPPDE putative peptidase domain,                           | Thioredoxin, putative<br>hypothetical protein AN7604.2                    |
| PDIG_72110 | -1.49 | -2.35 | PF02862,                     | DDHD,                          | DDHD domain,                                                                      | [Aspergillus nidulans FGSC A4]<br>Amino acid permease (Can1),<br>putative |
| PDIG_14180 | -1.50 | -1.91 | PF00324,                     | AA_permease,                   | Amino acid permease,                                                              | C4-dicarboxylate transporter/malic acid transport protein, putative       |
| PDIG_14820 | -1.50 | -1.82 | PF03595,                     | SLAC1,                         | Voltage-dependent anion channel,<br>Fungal Zn(2)-Cys(6) binuclear cluster domain, | hypothetical protein PDIP_86840                                           |
| PDIG_83050 | -1.51 | -1.64 | PF00172,                     | Zn_clus,                       |                                                                                   | hypothetical protein PDIG_03500                                           |
| PDIG_03500 | -1.51 | -2.36 |                              |                                |                                                                                   | hypothetical protein PDIP_37220                                           |
| PDIG_09190 | -1.53 | -3.10 | PF13489,                     | Methyltransf_23,               | Methyltransferase domain,                                                         | hypothetical protein PDIG_81150                                           |
| PDIG_81150 | -1.53 | -2.97 | PF00931,                     | NB-ARC,                        | NB-ARC domain,                                                                    | MFS transporter, putative                                                 |
| PDIG_34520 | -1.55 | -3.00 | PF07690,                     | MFS_1,                         | Major Facilitator Superfamily,                                                    |                                                                           |

|            |       |       |                              |                                   |                                                                                                         |                                                                                                                                                 |
|------------|-------|-------|------------------------------|-----------------------------------|---------------------------------------------------------------------------------------------------------|-------------------------------------------------------------------------------------------------------------------------------------------------|
| PDIG_21300 | -1.55 | -2.11 | PF00270,PF00271,<br>PF13959, | DEAD,Helicase_C,D<br>UF4217,      | DEAD/DEAH box helicase,Helicase<br>conserved C-terminal domain,Domain<br>of unknown function (DUF4217), | DEAD/DEAH box helicase (Sbp4),<br>putative<br>2,3-diketo-5-methylthio-1-phosphop<br>entane phosphatase, putative<br>[Penicillium digitatum Pd1] |
| PDIG_79590 | -1.55 | -4.22 | PF12710,                     | HAD,                              | haloacid dehalogenase-like hydrolase,<br>Fungal protein of unknown function                             |                                                                                                                                                 |
| PDIG_23060 | -1.55 | -2.30 | PF08611,                     | DUF1774,                          | (DUF1774),<br>impB/mucB/samB family C-terminal                                                          | hypothetical protein PDIG_23060                                                                                                                 |
| PDIG_45850 | -1.56 | -2.04 | PF11799,PF00817,             | IMS_C,IMS,                        | domain,impB/mucB/samB family,                                                                           | hypothetical protein PDIG_45850                                                                                                                 |
| PDIG_34340 | -1.58 | -5.13 | PF00704,                     | Glyco_hydro_18,                   | Glycosyl hydrolases family 18,                                                                          | Endochitinase 2                                                                                                                                 |
| PDIG_39730 | -1.59 | -1.87 | PF05920,                     | Homeobox_KN,<br>NAD_binding_8,adh | Homeobox KN domain,<br>NAD(P)-binding Rossmann-like                                                     | Homeobox transcription factor,<br>putative<br>Flavin-containing amine                                                                           |
| PDIG_05710 | -1.59 | -2.87 | PF13450,PF00106,             | _short,                           | domain,short chain dehydrogenase,                                                                       | oxidasedehydrogenase, putative                                                                                                                  |
| PDIG_04140 | -1.60 | -2.94 | PF01987,                     | AIM24,                            | Mitochondrial biogenesis AIM24,<br>Catalase-related                                                     | hypothetical protein PDIG_04140                                                                                                                 |
| PDIG_29310 | -1.61 | -3.00 | PF06628,PF00199,             | Catalase-rel,Catalase,            | immune-responsive,Catalase,                                                                             | Catalase                                                                                                                                        |
| PDIG_44550 | -1.61 | -2.98 | PF02458,                     | Transferase,                      | Transferase family,                                                                                     | hypothetical protein PDIG_44550                                                                                                                 |
| PDIG_16880 | -1.62 | -2.10 | PF01425,                     | Amidase,                          | Amidase,                                                                                                | General amidase GmdB                                                                                                                            |
| PDIG_80130 | -1.63 | -2.51 |                              |                                   |                                                                                                         | hypothetical protein PDIG_80130                                                                                                                 |
| PDIG_65410 | -1.63 | -1.77 | PF02798,PF14497,             | GST_N,GST_C_3,                    | Glutathione S-transferase, N-terminal<br>domain,Glutathione S-transferase,<br>C-terminal domain,        | Glutathione transferase 3                                                                                                                       |
| PDIG_81000 | -1.65 | -3.36 | PF10241,                     | KxDL,                             | Uncharacterized conserved protein,                                                                      | hypothetical protein PDIG_81000                                                                                                                 |

|            |       |       |                              |                                          |                                                                       |                                                                                                            |
|------------|-------|-------|------------------------------|------------------------------------------|-----------------------------------------------------------------------|------------------------------------------------------------------------------------------------------------|
| PDIG_12700 | -1.65 | -2.89 | PF02629,PF00285,<br>PF00549, | CoA_binding,Citrate<br>_synt,Ligase_CoA, | CoA binding domain,Citrate synthase,<br>C-terminal domain,CoA-ligase, | ATP citrate lyase, subunit 1,<br>putative                                                                  |
| PDIG_60750 | -1.66 | -4.50 | PF00083,                     | Sugar_tr,                                | Sugar (and other) transporter,                                        | Sugar transporter, putative                                                                                |
| PDIG_74670 | -1.67 | -3.19 | PF07690,                     | MFS_1,                                   | Major Facilitator Superfamily,                                        | hypothetical protein PDIG_74670                                                                            |
| PDIG_48540 | -1.67 | -2.40 | PF07690,                     | MFS_1,                                   | Major Facilitator Superfamily,                                        | MFS multidrug transporter, putative<br>hypothetical protein [Penicillium<br>chrysogenum Wisconsin 54-1255] |
| PDIG_32510 | -1.67 | -1.82 | PF00293,                     | NUDIX,                                   | NUDIX domain,                                                         | hypothetical protein PDIP_61280                                                                            |
| PDIG_26830 | -1.69 | -3.19 |                              |                                          |                                                                       | hypothetical protein PDIG_47180                                                                            |
| PDIG_47180 | -1.69 | -3.58 |                              |                                          |                                                                       | 14-alpha sterol demethylase<br>[Penicillium digitatum]                                                     |
| PDIG_85420 | -1.69 | -4.66 | PF00067,                     | p450,<br>GMC_oxred_N,GMC                 | Cytochrome P450,<br>GMC oxidoreductase,GMC                            |                                                                                                            |
| PDIG_82290 | -1.69 | -2.23 | PF00732,PF05199,             | _oxred_C,<br>ABC_tran,ABC_me             | oxidoreductase,<br>ABC transporter,ABC transporter                    | Choline oxidase (CodA), putative                                                                           |
| PDIG_16130 | -1.70 | -2.78 | PF00005,PF00664,             | mbrane,                                  | transmembrane region,<br>Pyridoxamine 5'-phosphate oxidase            | ABC transporter, putative                                                                                  |
| PDIG_57560 | -1.71 | -2.04 | PF16242,                     | Pyrid_ox_like,                           | like,<br>Fungal Zn(2)-Cys(6) binuclear cluster                        | Bli-3 protein, putative                                                                                    |
| PDIG_19210 | -1.71 | -2.22 | PF00172,                     | Zn_clus,                                 | domain,                                                               | hypothetical protein PDIG_19210                                                                            |
| PDIG_73350 | -1.72 | -3.14 |                              |                                          |                                                                       | hypothetical protein PDIG_73350                                                                            |
| PDIG_45860 | -1.73 | -2.59 | PF00730,                     | HhH-GPD,                                 | HhH-GPD superfamily base excision<br>DNA repair protein,              | Base excision DNA repair protein                                                                           |
| PDIG_15470 | -1.73 | -3.30 | PF05592,                     | Bac_rhamnosid,                           | Bacterial alpha-L-rhamnosidase,                                       | Rhamnosidase B, putative                                                                                   |
| PDIG_79580 | -1.74 | -6.00 | PF00343,                     | Phosphorylase,                           | Carbohydrate phosphorylase,                                           | Phosphorylase<br>Mediator of RNA polymerase II                                                             |
| PDIG_02320 | -1.75 | -2.28 | PF08689,                     | Med5,                                    | Mediator complex subunit Med5,                                        | transcription subunit 5                                                                                    |



|            |       |       |                  |                                      |                                                                                           |                                                                      |
|------------|-------|-------|------------------|--------------------------------------|-------------------------------------------------------------------------------------------|----------------------------------------------------------------------|
| PDIG_06200 | -1.77 | -2.90 | PF11700,         | ATG22,                               | Vacuole effluxer Atg22 like,                                                              | autophagy protein [Aspergillus kawachii IFO 4308]                    |
| PDIG_73520 | -1.79 | -2.43 | PF00026,         | Asp,                                 | Eukaryotic aspartyl protease,                                                             | Aspartic endopeptidase (AP1), putative                               |
| PDIG_23680 | -1.79 | -1.97 | PF06964,         | Alpha-L-AF_C,                        | Alpha-L-arabinofuranosidase C-terminal domain,                                            | Alpha-L-arabinofuranosidase, putative                                |
| PDIG_82110 | -1.80 | -1.85 | PF00012,         | HSP70,                               | Hsp70 protein,                                                                            | Hsp70 chaperone (HscA), putative [Talaromyces stipitatus ATCC 10500] |
| PDIG_02280 | -1.86 | -2.75 | PF13847,         | Methyltransf_31,                     | Methyltransferase domain,                                                                 | hypothetical protein PDIG_02280                                      |
| PDIG_33940 | -1.86 | -1.67 | PF13243,PF13249, | SQHop_cyclase_C,S<br>QHop_cyclase_N, | Squalene-hopene cyclase C-terminal domain,Squalene-hopene cyclase N-terminal domain,      | Oxidosqualene:lanosterol cyclase                                     |
| PDIG_75670 | -1.86 | -2.03 | PF11001,         | DUF2841,                             | Protein of unknown function (DUF2841),                                                    | hypothetical protein PDIG_75670                                      |
| PDIG_40470 | -1.87 | -2.01 | PF00920,         | ILVD_EDD,                            | Dehydratase family,                                                                       | Dihydroxy-acid dehydratase, putative                                 |
| PDIG_20480 | -1.87 | -6.71 | PF03169,         | OPT,                                 | OPT oligopeptide transporter protein,                                                     | hypothetical protein PDIG_20480                                      |
| PDIG_74430 | -1.88 | -3.40 | PF00155,         | Aminotran_1_2,                       | Aminotransferase class I and II,                                                          | hypothetical protein PDIG_74430                                      |
| PDIG_20330 | -1.88 | -2.41 |                  |                                      |                                                                                           | hypothetical protein PDIG_20330                                      |
| PDIG_22940 | -1.89 | -2.03 |                  |                                      |                                                                                           | hypothetical protein PDIG_22940                                      |
| PDIG_42270 | -1.90 | -2.42 | PF00172,PF04082, | Zn_clus,Fungal_trans<br>,            | Fungal Zn(2)-Cys(6) binuclear cluster domain,Fungal specific transcription factor domain, | hypothetical protein PDIG_42270                                      |
| PDIG_02990 | -1.91 | -3.78 | PF00324,         | AA_permease,                         | Amino acid permease,                                                                      | General amino acid permease (Agp2), putative                         |

|            |       |       |                  |                      |                                      |                                 |
|------------|-------|-------|------------------|----------------------|--------------------------------------|---------------------------------|
| PDIG_04180 | -1.92 | -3.36 | PF00076,         | RRM_1,               | RNA recognition motif. (a.k.a. RRM,  | hypothetical protein PDIG_04180 |
| PDIG_48520 | -1.92 | -4.00 |                  |                      | RBD, or RNP domain),                 | hypothetical protein PDIP_57890 |
| PDIG_18320 | -1.93 | -3.39 | PF05637,         | Glyco_transf_34,     | galactosyl transferase GMA12/MNN10   | hypothetical protein PDIP_56150 |
| PDIG_17890 | -1.94 | -3.53 | PF07976,PF01494, | Phe_hydrox_dim,FA    | family,                              | Phenol hydroxylase, C-terminal  |
| PDIG_54380 | -1.94 | -3.66 | PF13561,         | D_binding_3,adh_sh   | dimerisation domain,FAD binding      | Pentachlorophenol               |
| PDIG_90260 | -1.97 | -4.70 |                  | ort_C2,              | domain,Enoyl-(Acyl carrier protein)  | 4-monooxygenase, putative       |
|            |       |       |                  |                      | reductase,                           | hypothetical protein PDIG_54380 |
|            |       |       |                  |                      |                                      | hypothetical protein PDIG_90260 |
|            |       |       |                  |                      | RNA polymerase beta subunit,RNA      |                                 |
|            |       |       |                  | RNA_pol_Rpb2_1,R     | polymerase Rpb2, domain 2,RNA        |                                 |
|            |       |       |                  | NA_pol_Rpb2_2,RN     | polymerase Rpb2, domain 7,RNA        |                                 |
|            |       |       |                  | A_pol_Rpb2_7,RNA     | polymerase Rpb2, domain 3,RNA        |                                 |
|            |       |       | PF04563,PF04561, | _pol_Rpb2_3,RNA_p    | polymerase I, Rpa2 specific          |                                 |
| PDIG_86580 | -1.97 | -2.30 | PF04560,PF04565, | ol_Rpa2_4,RNA_pol    | domain,RNA polymerase Rpb2,          | DNA-directed RNA polymerase     |
| PDIG_37180 | -1.99 | -3.69 | PF06883,PF00562, | _Rpb2_6,             | domain 6,                            | hypothetical protein PDIP_83770 |
|            |       |       |                  |                      | Fungal specific transcription factor |                                 |
|            |       |       |                  | Fungal_trans_2,Zn_cl | domain,Fungal Zn(2)-Cys(6) binuclear | C6 sexual development           |
| PDIG_62380 | -2.00 | -3.87 | PF11951,PF00172, | us,                  | cluster domain,                      | transcription factor NosA       |
|            |       |       |                  | ABC_tran,ABC_me      | ABC transporter,ABC transporter      |                                 |
| PDIG_74660 | -2.02 | -4.12 | PF00005,PF00664, | mbrane,              | transmembrane region,                | ABC transporter, putative       |
| PDIG_51750 | -2.04 | -2.79 |                  |                      |                                      | hypothetical protein PDIG_51750 |
| PDIG_77390 | -2.05 | -2.64 | PF07690,         | MFS_1,               | Major Facilitator Superfamily,       | hypothetical protein PDIG_77390 |

|            |       |       |                  |                     |                                       |                                  |
|------------|-------|-------|------------------|---------------------|---------------------------------------|----------------------------------|
| PDIG_32410 | -2.07 | -4.51 | PF00069,         | Pkinase,            | Protein kinase domain,                | hypothetical protein PDIP_52000  |
| PDIG_91250 | -2.07 | -2.00 | PF00069,         | Pkinase,            | Protein kinase domain,                | hypothetical protein PDIG_91250  |
|            |       |       |                  |                     | Thiamine pyrophosphate enzyme,        |                                  |
|            |       |       |                  |                     | C-terminal TPP binding                |                                  |
|            |       |       |                  |                     | domain,Thiamine pyrophosphate         |                                  |
|            |       |       |                  | TPP_enzyme_C,TPP    | enzyme, central domain,Thiamine       |                                  |
|            |       |       | PF02775,PF00205, | _enzyme_M,TPP_en    | pyrophosphate enzyme, N-terminal      |                                  |
| PDIG_64810 | -2.08 | -2.07 | PF02776,         | zyme_N,             | TPP binding domain,                   | Pyruvate decarboxylase, putative |
| PDIG_51850 | -2.08 | -2.70 | PF00106,         | adh_short,          | short chain dehydrogenase,            | hypothetical protein PDIG_51850  |
|            |       |       |                  | ATP-grasp_2,Citrate | ATP-grasp domain,ATP citrate lyase    | ATP citrate lyase subunit (Acl), |
| PDIG_12710 | -2.09 | -1.95 | PF08442,PF16114, | _bind,              | citrate-binding,                      | putatibe                         |
| PDIG_08970 | -2.09 | -3.11 | PF00648,         | Peptidase_C2,       | Calpain family cysteine protease,     | Calpain-like protein             |
| PDIG_39970 | -2.10 | -3.10 |                  |                     |                                       | hypothetical protein PDIG_39970  |
|            |       |       |                  |                     | AMP-binding                           |                                  |
|            |       |       |                  |                     | enzyme,Phosphopantetheine             |                                  |
|            |       |       |                  | AMP-binding,PP-bin  | attachment site,Pyoverdine/dityrosine |                                  |
|            |       |       | PF00501,PF00550, | ding,DIT1_PvcA,Tra  | biosynthesis protein,Transferase      |                                  |
| PDIG_54280 | -2.12 | -3.81 | PF05141,PF02458, | nsferase,           | family,                               | Transferase family protein       |
| PDIG_03140 | -2.13 | -3.71 |                  |                     |                                       | hypothetical protein PDIP_41790  |
|            |       |       |                  |                     | gag-polypeptide of LTR                |                                  |
|            |       |       |                  |                     | copla-type,Reverse transcriptase      |                                  |
|            |       |       | PF14223,PF07727, | Retrotran_gag_2,RV  | (RNA-dependent DNA                    |                                  |
| PDIG_47150 | -2.15 | -4.97 | PF00665,         | T_2,rve,            | polymerase),Integrase core domain,    | hypothetical protein PDIG_47150  |
|            |       |       |                  | Peptidase_M1,Leuk-  | Peptidase family M1,Leukotriene A4    |                                  |
| PDIG_55390 | -2.17 | -1.85 | PF01433,PF09127, | A4-hydro_C,         | hydrolase, C-terminal,                | Leukotriene A4 hydrolase         |
| PDIG_09680 | -2.19 | -2.73 | PF02560,         | Cyanate_lyase,      | Cyanate lyase C-terminal domain,      | Cyanate hydratase                |

|            |       |       |                  |                          |                                                                |                                                        |
|------------|-------|-------|------------------|--------------------------|----------------------------------------------------------------|--------------------------------------------------------|
| PDIG_06910 | -2.19 | -3.40 | PF04488,         | Gly_transf_sug,          | Glycosyltransferase sugar-binding region containing DXD motif, | hypothetical protein PDIG_06910                        |
| PDIG_32430 | -2.19 | -4.64 | PF00324,         | AA_permease,             | Amino acid permease,                                           | hypothetical protein PDIP_52020                        |
| PDIG_90250 | -2.20 | -5.89 | PF11838,PF01433, | ERAP1_C,Peptidase_M1,    | ERAP1-like C-terminal domain,Peptidase family M1,              | Aminopeptidase                                         |
| PDIG_67650 | -2.20 | -3.73 | PF00083,         | Sugar_tr,                | Sugar (and other) transporter,                                 | hypothetical protein PDIP_76950                        |
| PDIG_45080 | -2.21 | -2.55 | PF03972,         | MmgE_PrpD,               | MmgE/PrpD family,                                              | 2-methylcitrate dehydratase, putative                  |
| PDIG_42320 | -2.21 | -2.46 | PF00732,PF05199, | GMC_oxred_N,GMC_oxred_C, | GMC oxidoreductase,GMC oxidoreductase,                         | hypothetical protein PDIG_42320                        |
| PDIG_70990 | -2.21 | -4.95 | PF01490,         | Aa_trans,                | Transmembrane amino acid transporter protein,                  | hypothetical protein PDIP_80310                        |
| PDIG_86840 | -2.22 | -2.24 | PF00067,         | p450,                    | Cytochrome P450,                                               | hypothetical protein PDIG_86840                        |
| PDIG_76080 | -2.24 | -2.33 | PF00743,         | FMO-like,                | Flavin-binding monooxygenase-like,                             | Flavin-binding monooxygenase-like protein              |
| PDIG_10600 | -2.25 | -2.45 |                  |                          |                                                                | Pc21g04140 [Penicillium chrysogenum Wisconsin 54-1255] |
| PDIG_02690 | -2.27 | -2.30 | PF00324,         | AA_permease,             | Amino acid permease,                                           | Amino acid permease, putative                          |
| PDIG_05020 | -2.27 | -1.80 | PF03630,         | Fumble,                  | Fumble,                                                        | Pantothenate kinase, putative                          |
| PDIG_48170 | -2.28 | -3.32 | PF13450,         | NAD_binding_8,           | NAD(P)-binding Rossmann-like domain,                           | hypothetical protein PDIP_57550                        |
| PDIG_20360 | -2.29 | -4.36 |                  |                          |                                                                | hypothetical protein PDIG_20360                        |
| PDIG_63600 | -2.29 | -1.81 |                  |                          |                                                                | hypothetical protein PDIG_63600                        |
| PDIG_82190 | -2.29 | -1.75 | PF02803,PF00108, | Thiolase_C,Thiolase_N,   | Thiolase, C-terminal domain,Thiolase, N-terminal domain,       | Pc22g10140 [Penicillium chrysogenum Wisconsin 54-1255] |
| PDIG_63230 | -2.30 | -2.29 |                  |                          |                                                                | hypothetical protein PDIP_72610                        |

|            |       |       |                  |                     |                                                                             |                                                        |
|------------|-------|-------|------------------|---------------------|-----------------------------------------------------------------------------|--------------------------------------------------------|
| PDIG_55660 | -2.32 | -2.00 |                  |                     |                                                                             | hypothetical protein PDIG_55660                        |
| PDIG_19810 | -2.35 | -2.78 | PF00644,PF00179, | PARP,UQ_con,        | Poly(ADP-ribose) polymerase catalytic domain,Ubiquitin-conjugating enzyme,  | Ubiquitin conjugating enzyme, putative                 |
| PDIG_48690 | -2.36 | -2.04 | PF07690,         | MFS_1,              | Major Facilitator Superfamily,                                              | hypothetical protein PDIP_58070                        |
| PDIG_24580 | -2.37 | -2.11 |                  |                     |                                                                             | hypothetical protein PDIP_59060                        |
| PDIG_87130 | -2.39 | -3.75 | PF03098,PF00067, | An_peroxidase,p450, | Animal haem peroxidase,Cytochrome P450,                                     | hypothetical protein PDIG_87130                        |
| PDIG_21480 | -2.40 | -3.17 | PF00743,         | FMO-like,           | Flavin-binding monooxygenase-like,                                          | Flavin-binding monooxygenase, putative                 |
| PDIG_80140 | -2.40 | -3.77 | PF02668,         | TauD,               | Taurine catabolism dioxygenase TauD, TfdA family,                           | Pc13g10890 [Penicillium chrysogenum Wisconsin 54-1255] |
| PDIG_67330 | -2.43 | -2.18 |                  |                     |                                                                             | hypothetical protein PDIP_76630                        |
| PDIG_50840 | -2.46 | -2.39 | PF02548,         | Pantoate_transf,    | Ketopantoate hydroxymethyltransferase,                                      | 3-methyl-2-oxobutanoate hydroxymethyltransferase PanB  |
| PDIG_45930 | -2.49 | -4.22 |                  |                     |                                                                             | hypothetical protein PDIG_45930                        |
| PDIG_25360 | -2.49 | -6.06 | PF00665,PF07727, | rve,RVT_2,          | Integrase core domain,Reverse transcriptase (RNA-dependent DNA polymerase), | hypothetical protein PDIG_33240                        |
| PDIG_06440 | -2.49 | -6.06 | PF00665,PF07727, | rve,RVT_2,          | Integrase core domain,Reverse transcriptase (RNA-dependent DNA polymerase), | hypothetical protein PDIG_33240                        |
| PDIG_44570 | -2.50 | -3.56 | PF00067,         | p450,               | Cytochrome P450,                                                            | hypothetical protein PDIG_44570                        |
| PDIG_76450 | -2.51 | -2.86 | PF08240,PF00107, | ADH_N,ADH_zinc_N,   | Alcohol dehydrogenase GroES-like domain,Zinc-binding dehydrogenase,         | hypothetical protein PDIG_76450                        |
| PDIG_75570 | -2.52 | -3.46 | PF00291,         | PALP,               | Pyridoxal-phosphate dependent enzyme,                                       | Tryptophan synthase                                    |

|            |       |       |                              |                                              |                                                                                                                         |                                                   |
|------------|-------|-------|------------------------------|----------------------------------------------|-------------------------------------------------------------------------------------------------------------------------|---------------------------------------------------|
| PDIG_28880 | -2.53 | -4.11 | PF00561,                     | Abhydrolase_1,                               | alpha/beta hydrolase fold,                                                                                              | hypothetical protein PDIP_63320                   |
| PDIG_70870 | -2.59 | -3.43 |                              |                                              |                                                                                                                         | hypothetical protein PDIP_80190                   |
| PDIG_86690 | -2.61 | -3.24 | PF00581,                     | Rhodanese,                                   | Rhodanese-like domain,                                                                                                  | hypothetical protein PDIG_86690                   |
| PDIG_26220 | -2.62 | -4.69 |                              |                                              |                                                                                                                         | hypothetical protein PDIP_60700                   |
| PDIG_34790 | -2.62 | -2.59 | PF13489,                     | Methyltransf_23,                             | Methyltransferase domain,                                                                                               | hypothetical protein PDIP_54360                   |
| PDIG_57930 | -2.63 | -6.04 | PF00067,                     | p450,                                        | Cytochrome P450,                                                                                                        | Bifunctional P450:NADPH-P450 reductase            |
| PDIG_43010 | -2.67 | -3.17 |                              |                                              |                                                                                                                         | hypothetical protein PDIG_43010                   |
| PDIG_91260 | -2.68 | -4.14 |                              |                                              |                                                                                                                         | hypothetical protein PDIG_91260                   |
| PDIG_33380 | -2.69 | -2.48 | PF00501,PF13193,             | AMP-binding,AMP-b<br>inding_C,               | AMP-binding enzyme,AMP-binding<br>enzyme C-terminal domain,                                                             | Phenylacetyl-CoA ligase                           |
| PDIG_43670 | -2.70 | -3.89 | PF03184,PF03221,             | DDE_1,HTH_Tnp_T<br>c5,                       | DDE superfamily endonuclease,Tc5<br>transposase DNA-binding domain,                                                     | Histone H3                                        |
| PDIG_58080 | -2.71 | -3.73 | PF03632,PF03636,             | Glyco_hydro_65m,Gl<br>yco_hydro_65N,         | Glycosyl hydrolase family 65 central<br>catalytic domain,Glycosyl hydrolase<br>family 65, N-terminal domain,            | Alpha,alpha-trehalose<br>glucohydrolase TreA/Ath1 |
| PDIG_16190 | -2.72 | -4.90 | PF02801,PF00106,<br>PF00109, | Ketoacyl-synt_C,adh<br>_short,ketoacyl-synt, | Beta-ketoacyl synthase, C-terminal<br>domain,short chain<br>dehydrogenase,Beta-ketoacyl synthase,<br>N-terminal domain, | Fatty acid synthase subunit alpha,<br>putative    |
| PDIG_32750 | -2.73 | -6.85 | PF11001,                     | DUF2841,                                     | Protein of unknown function<br>(DUF2841),<br>Glycosyl hydrolase family 79                                               | hypothetical protein PDIG_32750                   |
| PDIG_15450 | -2.76 | -2.85 | PF16862,                     | Glyco_hydro_79C,                             | C-terminal beta domain,                                                                                                 | hypothetical protein PDIG_15450                   |
| PDIG_34570 | -2.79 | -6.15 | PF02780,PF02779,<br>PF00456, | Transketolase_C,Tra<br>nsket_pyr,Transketol  | Transketolase, C-terminal<br>domain,Transketolase, pyrimidine                                                           | hypothetical protein PDIG_34570                   |

|            |       |       |                              |                                     |                                                                         |                                                          |
|------------|-------|-------|------------------------------|-------------------------------------|-------------------------------------------------------------------------|----------------------------------------------------------|
|            |       |       |                              | ase_N,                              | binding domain,Transketolase,<br>thiamine diphosphate binding domain,   |                                                          |
| PDIG_03410 | -2.88 | -3.57 | PF00069,                     | Pkinase,                            | Protein kinase domain,<br>Tetratricopeptide                             | hypothetical protein PDIG_03410                          |
| PDIG_22270 | -2.89 | -3.58 | PF13424,PF13374,             | TPR_12,TPR_10,                      | repeat,Tetratricopeptide repeat,<br>tRNA synthetases class II (D, K and | hypothetical protein PDIG_22270                          |
| PDIG_81790 | -2.89 | -7.58 | PF00152,                     | tRNA-synt_2,                        | N),                                                                     | hypothetical protein PDIG_81790<br>cytochrome P-450 14DM |
| PDIG_70830 | -2.91 | -4.45 | PF00067,                     | p450,                               | Cytochrome P450,                                                        | [Penicillium digitatum]                                  |
| PDIG_86670 | -2.96 | -3.65 | PF13176,                     | TPR_7,                              | Tetratricopeptide repeat,                                               | hypothetical protein PDIG_86670                          |
| PDIG_24590 | -2.98 | -3.68 |                              |                                     |                                                                         | hypothetical protein PDIG_24590                          |
|            |       |       |                              |                                     | Glycosyl hydrolase family 30 beta<br>sandwich domain,Glycosyl hydrolase |                                                          |
| PDIG_34560 | -2.99 | -6.31 | PF17189,PF02055,             | Glyco_hydro_30C,Gl<br>yc_ohydro_30, | family 30 TIM-barrel domain,                                            | Beta-1,6-glucanase Neg1, putative                        |
| PDIG_21490 | -3.00 | -4.92 | PF00891,                     | Methyltransf_2,                     | O-methyltransferase,                                                    | hypothetical protein PDIG_21490                          |
| PDIG_57830 | -3.01 | -4.58 |                              |                                     |                                                                         | hypothetical protein PDIP_67340<br>Short-chain           |
| PDIG_39980 | -3.03 | -3.70 | PF00106,<br>PF00394,PF07732, | adh_short,<br>Cu-oxidase,Cu-oxida   | short chain dehydrogenase,<br>Multicopper oxidase,Multicopper           | dehydrogenase/reductase 2, putative                      |
| PDIG_24520 | -3.07 | -2.28 | PF07731,                     | se_3,Cu-oxidase_2,                  | oxidase,Multicopper oxidase,                                            | Hypothetical protein PDIP_59000                          |
| PDIG_35840 | -3.08 | -3.12 |                              |                                     |                                                                         | hypothetical protein PDIG_35840                          |
| PDIG_16120 | -3.11 | -2.76 | PF04479,                     | RTA1,<br>Ferric_reduct,NAD_b        | RTA1 like protein,<br>Ferric reductase like transmembrane               | hypothetical protein PDIP_87630                          |
|            |       |       | PF01794,PF08030,             | inding_6,FAD_bindi                  | component,Ferric reductase NAD                                          |                                                          |
| PDIG_75350 | -3.17 | -2.84 | PF08022,                     | ng_8,                               | binding domain,FAD-binding domain,                                      | NADPH oxidase (NoxA), putative                           |
| PDIG_04070 | -3.18 | -4.10 |                              |                                     |                                                                         | hypothetical protein PDIG_04070                          |

|            |       |       |                           |                                          |                                                                                                                                                                          |                                                                   |
|------------|-------|-------|---------------------------|------------------------------------------|--------------------------------------------------------------------------------------------------------------------------------------------------------------------------|-------------------------------------------------------------------|
| PDIG_00120 | -3.20 | -8.12 | PF08240,                  | ADH_N,                                   | Alcohol dehydrogenase GroES-like domain,                                                                                                                                 | NADP-dependent alcohol dehydrogenase [Grosmania clavigera kw1407] |
| PDIG_75660 | -3.22 | -3.94 | PF00734,PF00331,          | CBM_1,Glyco_hydro                        | Fungal cellulose binding domain,Glycosyl hydrolase family 10,                                                                                                            | Endo-1,4-beta-xylanase, putative                                  |
| PDIG_32460 | -3.23 | -3.22 | PF03184,                  | DDE_1,                                   | DDE superfamily endonuclease,                                                                                                                                            | hypothetical protein PDIG_32460                                   |
| PDIG_91270 | -3.25 | -5.20 |                           |                                          | Protein of unknown function                                                                                                                                              | hypothetical protein PDIG_91270                                   |
| PDIG_67240 | -3.25 | -3.63 | PF14021,                  | DUF4237,                                 | (DUF4237),                                                                                                                                                               | hypothetical protein PDIP_76540                                   |
| PDIG_81760 | -3.27 | -6.98 |                           |                                          |                                                                                                                                                                          | hypothetical protein PDIG_81760                                   |
| PDIG_32950 | -3.30 | -3.85 | PF08491,                  | SE,                                      | Squalene epoxidase,                                                                                                                                                      | Squalene epoxidase-like protein                                   |
| PDIG_25300 | -3.34 | -2.16 |                           |                                          |                                                                                                                                                                          | hypothetical protein PDIP_59790                                   |
| PDIG_16160 | -3.34 | -3.62 | PF00067,                  | p450,                                    | Cytochrome P450,                                                                                                                                                         | Benzoate 4-monooxygenase cytochrome P450                          |
| PDIG_31620 | -3.35 | -3.43 | PF07690,                  | MFS_1,                                   | Major Facilitator Superfamily,                                                                                                                                           | hypothetical protein PDE_09880 [Penicillium oxalicum 114-2]       |
| PDIG_52750 | -3.49 | -2.95 | PF00753,                  | Lactamase_B,                             | Metallo-beta-lactamase superfamily,                                                                                                                                      | Metallo-beta-lactamase superfamily protein                        |
| PDIG_83640 | -3.51 | -4.70 | PF07690,                  | MFS_1,                                   | Major Facilitator Superfamily,                                                                                                                                           | MFS monocarboxylate transporter, putative                         |
| PDIG_56310 | -3.52 | -3.35 | PF02775,PF02776, PF00205, | TPP_enzyme_C,TPP _enzyme_N,TPP_enzyme_M, | Thiamine pyrophosphate enzyme, C-terminal TPP binding domain,Thiamine pyrophosphate enzyme, N-terminal TPP binding domain,Thiamine pyrophosphate enzyme, central domain, | hypothetical protein PDIP_65870                                   |



|            |       |       |                              |                                      |                                                                                                |                                                                                      |
|------------|-------|-------|------------------------------|--------------------------------------|------------------------------------------------------------------------------------------------|--------------------------------------------------------------------------------------|
| PDIG_68830 | -3.54 | -3.78 | PF12311,                     | DUF3632,                             | Protein of unknown function<br>(DUF3632),                                                      | hypothetical protein PDIP_78110                                                      |
| PDIG_78050 | -3.60 | -3.68 | PF01498,PF13358,             | HTH_Tnp_Tc3_2,D<br>DE_3,             | Transposase,DDE superfamily<br>endonuclease,                                                   | Transposable element tc3<br>transposase, putative                                    |
| PDIG_77400 | -3.61 | -3.33 | PF07727,PF00665,             | RVT_2,rve,                           | Reverse transcriptase (RNA-dependent<br>DNA polymerase),Integrase core<br>domain,              | Retrovirus-related Pol polyprotein<br>from transposon TNT 1-94                       |
| PDIG_45840 | -3.68 | -3.73 | PF01370,                     | Epimerase,                           | NAD dependent epimerase/dehydratase<br>family,                                                 | hypothetical protein PDIG_45840<br>MFS multidrug resistance<br>transporter, putative |
| PDIG_73390 | -3.89 | -4.13 | PF07690,                     | MFS_1,                               | Major Facilitator Superfamily,                                                                 | hypothetical protein PDIP_79810                                                      |
| PDIG_70500 | -3.96 | -5.31 | PF01494,                     | FAD_binding_3,                       | FAD binding domain,                                                                            | 2-haloalkanoic acid dehalogenase,<br>putative                                        |
| PDIG_02680 | -3.99 | -2.17 |                              |                                      |                                                                                                | hypothetical protein PDIP_52770                                                      |
| PDIG_33180 | -4.01 | -4.12 | PF04116,                     | FA_hydroxylase,<br>DNA_photolyase,FA | Fatty acid hydroxylase superfamily,<br>DNA photolyase,FAD binding domain<br>of DNA photolyase, | DNA photolyase, putative                                                             |
| PDIG_70460 | -4.02 | -3.37 | PF00875,PF03441,             | D_binding_7,                         |                                                                                                | hypothetical protein PDIG_76380                                                      |
| PDIG_76380 | -4.17 | -7.02 |                              |                                      |                                                                                                | MFS multidrug transporter, putative                                                  |
| PDIG_83570 | -4.18 | -6.23 | PF07690,                     | MFS_1,                               | Major Facilitator Superfamily,                                                                 | hypothetical protein PDIG_45330                                                      |
| PDIG_45330 | -4.27 | -3.72 |                              |                                      |                                                                                                | ABC transporter,ABC-2 type<br>transporter,CDR ABC transporter,                       |
| PDIG_02350 | -4.41 | -6.45 | PF00005,PF01061,<br>PF06422, | ABC_tran,ABC2_me<br>mbrane,PDR_CDR,  |                                                                                                | ABC transporter, putative<br>Integral membrane protein                               |
| PDIG_51840 | -4.43 | -5.98 |                              |                                      |                                                                                                | Pth11-like, putative<br>Branched-chain amino acid<br>aminotransferase                |
| PDIG_16180 | -4.47 | -3.97 | PF01063,                     | Aminotran_4,                         | Amino-transferase class IV,                                                                    |                                                                                      |

|                                                                        |       |       |                                      |                                    |                                                                          |                                                           |
|------------------------------------------------------------------------|-------|-------|--------------------------------------|------------------------------------|--------------------------------------------------------------------------|-----------------------------------------------------------|
| PDIG_66050                                                             | -4.73 | -7.73 |                                      |                                    |                                                                          | hypothetical protein PDIP_75350                           |
| PDIG_68750                                                             | -4.90 | -2.50 | PF03663,                             | Glyco_hydro_76,                    | Glycosyl hydrolase family 76,                                            | Glycosyl hydrolase, putative                              |
| PDIG_42030                                                             | -4.93 | -5.52 | PF01828,                             | Peptidase_A4,                      | Peptidase A4 family,                                                     | Aspergillopepsin, putative                                |
| PDIG_01990                                                             | -5.13 | -7.04 |                                      |                                    |                                                                          | hypothetical protein PDIG_01990                           |
| PDIG_66060                                                             | -5.48 | -9.28 |                                      |                                    |                                                                          | hypothetical protein PDIG_66060                           |
|                                                                        |       |       |                                      |                                    | Hydroxymethylglutaryl-coenzyme A synthase C                              |                                                           |
| PDIG_64840                                                             | -5.49 | -4.50 | PF08540,PF01154,                     | HMG_CoA_synt_C,<br>HMG_CoA_synt_N, | terminal,Hydroxymethylglutaryl-coenzyme A synthase N terminal,           | hypothetical protein PDIP_74170                           |
|                                                                        |       |       | PF00075,PF14529,                     | RNase_H,Exo_endo_                  | RNase H,Endonuclease-reverse transcriptase,Reverse transcriptase         | putative RNA-directed DNA polymerase from transposon      |
| PDIG_18140                                                             | -6.83 | -6.52 | PF00078,                             | phos_2,RVT_1,                      | (RNA-dependent DNA polymerase),                                          | X-element                                                 |
| PDIG_15540                                                             | -6.86 | -7.22 | PF13673,                             | Acetyltransf_10,                   | Acetyltransferase (GNAT) domain,                                         | Polyamine acetyltransferase                               |
| PDIG_16300                                                             | -7.43 | -7.12 | PF00665,                             | rve,                               | Integrase core domain,                                                   | hypothetical protein PDIG_33240                           |
|                                                                        |       |       |                                      |                                    | Integrase core domain,Retroviral aspartyl protease,Reverse transcriptase |                                                           |
| PDIG_11580                                                             | -8.79 | -8.48 | PF00665,PF08284,<br>PF00078,PF00098, | rve,RVP_2,RVT_1,zf<br>-CCHC,       | (RNA-dependent DNA polymerase),Zinc knuckle,                             | Retrotransposon polyprotein, putative                     |
| 98 common elements in " $\Delta$ PdsreA-up" and " $\Delta$ PdsreB-up": |       |       |                                      |                                    |                                                                          |                                                           |
| PDIG_22810                                                             | 8.28  | 8.49  | PF00135,                             | COesterase,                        | Carboxylesterase family,                                                 | Triacylglycerol lipase (LipA), putative                   |
| PDIG_84400                                                             | 7.58  | 2.65  | PF00324,                             | AA_permease,                       | Amino acid permease,                                                     | hypothetical protein PDIG_84400                           |
|                                                                        |       |       |                                      |                                    | HpcH/HpaI aldolase/citrate lyase family,                                 | 2,4-dihydroxyhept-2-ene-1,7-dioic acid aldolase, putative |
| PDIG_54620                                                             | 7.43  | 8.52  | PF03328,                             | HpcH_HpaI,                         |                                                                          |                                                           |

|            |      |      |                  |                                      |                                                                                                                      |                                                     |
|------------|------|------|------------------|--------------------------------------|----------------------------------------------------------------------------------------------------------------------|-----------------------------------------------------|
|            |      |      |                  |                                      | 2OG-Fe(II) oxygenase                                                                                                 |                                                     |
| PDIG_54640 | 7.34 | 8.27 | PF03171,PF14226, | 2OG-FeII_Oxy,DIO<br>X_N,             | superfamily,non-haem dioxygenase in<br>morphine synthesis N-terminal,                                                | Gibberellin 3-beta hydroxylase,<br>putative         |
| PDIG_54610 | 7.25 | 5.93 | PF07690,         | MFS_1,                               | Major Facilitator Superfamily,                                                                                       | hypothetical protein PDIG_54610                     |
| PDIG_00580 | 7.20 | 4.92 | PF05199,PF00732, | GMC_oxred_C,GMC<br>_oxred_N,         | GMC oxidoreductase,GMC<br>oxidoreductase,                                                                            | Glucose oxidase, putative                           |
| PDIG_65980 | 7.05 | 4.45 | PF00665,PF07727, | rve,RVT_2,                           | Integrase core domain,Reverse<br>transcriptase (RNA-dependent DNA<br>polymerase),                                    | hypothetical protein PDIG_33240                     |
| PDIG_58160 | 6.93 | 3.50 | PF00251,PF08244, | Glyco_hydro_32N,Gl<br>yco_hydro_32C, | Glycosyl hydrolases family 32<br>N-terminal domain,Glycosyl<br>hydrolases family 32 C terminal,                      | Extracellular invertase                             |
| PDIG_54630 | 6.55 | 8.09 | PF01042,         | Ribonuc_L-PSP,                       | Endoribonuclease L-PSP,<br>D-isomer specific 2-hydroxyacid<br>dehydrogenase, NAD binding<br>domain,D-isomer specific | hypothetical protein PDIG_54630                     |
| PDIG_46550 | 6.25 | 3.79 | PF02826,PF00389, | 2-Hacid_dh_C,2-Hac<br>id_dh,         | 2-hydroxyacid dehydrogenase,<br>catalytic domain,                                                                    | Formate dehydrogenase                               |
| PDIG_27790 | 5.11 | 2.55 |                  |                                      |                                                                                                                      | hypothetical protein PDIP_62230                     |
| PDIG_35500 | 4.99 | 4.28 | PF06628,PF00199, | Catalase-rel,Catalase,               | Catalase-related<br>immune-responsive,Catalase,                                                                      | Catalase                                            |
| PDIG_87520 | 4.88 | 1.96 |                  |                                      |                                                                                                                      | hypothetical protein PDIG_87520                     |
| PDIG_88040 | 4.70 | 3.33 | PF03211,         | Pectate_lyase,                       | Pectate lyase,<br>SMP-30/Gluconolactonase/LRE-like<br>region,                                                        | putative pectate lyase 1 [Penicillium<br>digitatum] |
| PDIG_57950 | 4.63 | 4.91 | PF08450,         | SGL,                                 |                                                                                                                      | hypothetical protein PDIP_67450                     |

|            |      |      |                                      |                                                        |                                                                                                             |                                                                                         |
|------------|------|------|--------------------------------------|--------------------------------------------------------|-------------------------------------------------------------------------------------------------------------|-----------------------------------------------------------------------------------------|
| PDIG_17140 | 4.50 | 3.25 | PF02668,                             | TauD,                                                  | Taurine catabolism dioxygenase TauD,<br>TfdA family,                                                        | hypothetical protein PDIP_55050                                                         |
| PDIG_48410 | 4.43 | 4.69 | PF00544,                             | Pec_lyase_C,                                           | Pectate lyase,                                                                                              | putative pectin lyase 2 [Penicillium<br>digitatum]                                      |
| PDIG_28100 | 4.43 | 2.38 | PF00295,                             | Glyco_hydro_28,                                        | Glycosyl hydrolases family 28,                                                                              | putative exopolygalacturonase 1<br>[Penicillium digitatum]                              |
| PDIG_03520 | 4.35 | 2.35 | PF07690,                             | MFS_1,                                                 | Major Facilitator Superfamily,                                                                              | hypothetical protein PDIG_03520                                                         |
| PDIG_91100 | 4.22 | 3.91 | PF00710,                             | Asparaginase,                                          | Asparaginase, N-terminal,                                                                                   | L-asparaginase                                                                          |
| PDIG_00830 | 4.13 | 3.56 | PF00083,                             | Sugar_tr,                                              | Sugar (and other) transporter,                                                                              | MFS monosaccharide transporter,<br>putative                                             |
| PDIG_50400 | 4.09 | 3.54 | PF00962,                             | A_deaminase,                                           | Adenosine/AMP deaminase,                                                                                    | Adenosine deaminase                                                                     |
| PDIG_54650 | 3.84 | 3.95 | PF13561,                             | adh_short_C2,                                          | Enoyl-(Acyl carrier protein) reductase,                                                                     | 3-ketoacyl-acyl carrier protein<br>reductase, putative                                  |
| PDIG_36660 | 3.81 | 3.88 | PF00291,                             | PALP,                                                  | Pyridoxal-phosphate dependent<br>enzyme,<br>Copper amine oxidase, N3<br>domain,Copper amine oxidase, enzyme | 1-aminocyclopropane-1-carboxylate<br>deaminase, putative [Penicillium<br>digitatum Pd1] |
| PDIG_50100 | 3.78 | 3.10 | PF02727,                             | Cu_amine_oxidN3,C<br>u_amine_oxid,Cu_a<br>mine_oxidN2, | domain,Copper amine oxidase, N2<br>domain,                                                                  | Primary amine oxidase                                                                   |
| PDIG_51500 | 3.77 | 2.97 |                                      |                                                        |                                                                                                             | hypothetical protein PDIG_51500                                                         |
| PDIG_36540 | 3.74 | 3.14 | PF06516,                             | NUP,<br>Glyco_hydro_35,Bet                             | Purine nucleoside permease (NUP),<br>Glycosyl hydrolases family                                             | Purine nucleoside permease,<br>putative                                                 |
| PDIG_36090 | 3.72 | 1.87 | PF01301,PF13364,<br>PF13363,PF10435, | aGal_dom4_5,BetaG<br>al_dom3,BetaGal_do                | 35,Beta-galactosidase jelly roll<br>domain,Beta-galactosidase, domain                                       | hypothetical protein PDIG_36090                                                         |

|            |      |      |                  |                   |                                        |                                                           |
|------------|------|------|------------------|-------------------|----------------------------------------|-----------------------------------------------------------|
|            |      |      |                  | m2,               | 3,Beta-galactosidase, domain 2,        |                                                           |
| PDIG_05350 | 3.68 | 2.77 | PF01095,         | Pectinesterase,   | Pectinesterase,                        | Pectin methylesterase, putative                           |
| PDIG_51490 | 3.61 | 4.04 |                  |                   |                                        | hypothetical protein PDIG_51490                           |
| PDIG_71910 | 3.55 | 2.05 | PF01384,         | PHO4,             | Phosphate transporter family,          | Sodium/phosphate symporter,<br>putative                   |
| PDIG_82760 | 3.13 | 4.40 | PF07690,         | MFS_1,            | Major Facilitator Superfamily,         | Pc22g09270 [Penicillium<br>chrysogenum Wisconsin 54-1255] |
| PDIG_01900 | 3.06 | 1.73 | PF13537,PF00733, | GATase_7,Asn_synt | Glutamine amidotransferase             | Asparagine synthetase Asn2,                               |
| PDIG_51150 | 3.05 | 4.00 |                  | hase,             | domain,Asparagine synthase,            | putative                                                  |
| PDIG_90800 | 3.04 | 3.13 | PF05199,PF00732, | GMC_oxred_C,GMC   | GMC oxidoreductase,GMC                 | Glycosyl hydrolase, putative                              |
| PDIG_08170 | 3.03 | 4.78 | PF01619,         | _oxred_N,         | oxidoreductase,                        | Cellobiose dehydrogenase                                  |
| PDIG_51800 | 3.02 | 4.61 | PF01670,         | Pro_dh,           | Proline dehydrogenase,                 | Proline oxidase PrnD                                      |
|            |      |      |                  | Glyco_hydro_12,   | Glycosyl hydrolase family 12,          | hypothetical protein PDIG_51800                           |
|            |      |      |                  | Glyco_hydro_28,NA | Glycosyl hydrolases family             | RecName: Full=Polygalacturonase;<br>Short=PG; AltName:    |
| PDIG_30080 | 2.95 | 2.69 | PF00295,PF13460, | D_binding_10,     | 28,NAD(P)H-binding,                    | Full=Pectinase; Flags: Precursor                          |
| PDIG_08180 | 2.80 | 3.08 | PF00324,         | AA_permease,      | Amino acid permease,                   | Proline-specific permease                                 |
|            |      |      |                  | ADH_zinc_N,ADH_   | Zinc-binding dehydrogenase,Alcohol     |                                                           |
| PDIG_36670 | 2.79 | 2.33 | PF00107,PF08240, | N,                | dehydrogenase GroES-like domain,       | Formaldehyde dehydrogenase                                |
| PDIG_85320 | 2.72 | 2.21 | PF00860,         | Xan_ur_permease,  | Permease family,                       | Purine permease, putative                                 |
| PDIG_88160 | 2.55 | 2.80 | PF07690,         | MFS_1,            | Major Facilitator Superfamily,         | Pantothenate transporter                                  |
| PDIG_60720 | 2.53 | 2.03 | PF01266,         | DAO,              | FAD dependent oxidoreductase,          | hypothetical protein PDIP_70150                           |
|            |      |      |                  |                   |                                        | Dihydrodipicolinate synthetase                            |
| PDIG_65660 | 2.27 | 2.39 | PF00701,         | DHDPS,            | Dihydrodipicolinate synthetase family, | family protein                                            |

|            |      |      |                  |                   |                                                                                                                 |                                                                          |
|------------|------|------|------------------|-------------------|-----------------------------------------------------------------------------------------------------------------|--------------------------------------------------------------------------|
| PDIG_81110 | 2.26 | 1.78 | PF14226,         | DIOX_N,           | non-haem dioxygenase in morphine synthesis N-terminal, Protein of unknown function (DUF3455),Protein of unknown | 2OG-Fe(II) oxygenase superfamily protein [Aspergillus kawachii IFO 4308] |
| PDIG_57310 | 2.20 | 2.72 | PF11937,PF11693, | DUF3455,DUF2990,  | function (DUF2990), Glu/Leu/Phe/Val dehydrogenase, dimerisation                                                 | putative fungal protein                                                  |
| PDIG_02310 | 2.20 | 1.79 | PF02812,PF00208, | ELFV_dehydrog_N,  | domain,Glutamate/Leucine/Phenylalani                                                                            | NADP-specific glutamate dehydrogenase                                    |
| PDIG_26810 | 2.20 | 1.85 | PF00487,         | ELFV_dehydrog,    | ne/Valine dehydrogenase,                                                                                        | Oleate delta-12 desaturase                                               |
| PDIG_85730 | 2.17 | 2.21 | PF04828,         | FA_desaturase,    | Fatty acid desaturase,                                                                                          | Putative glutathione-dependent                                           |
| PDIG_06950 | 2.15 | 2.18 | PF03820,         | GFA,              | formaldehyde-activating enzyme,                                                                                 | formaldehyde-activating enzyme                                           |
| PDIG_33430 | 2.12 | 3.08 | PF02727,PF01179, | Mtc,              | Tricarboxylate carrier,                                                                                         | Mitochondrial cation transporter,                                        |
| PDIG_87460 | 2.11 | 2.76 | PF01490,         | Cu_amine_oxidN2,C | Copper amine oxidase, N2                                                                                        | putative                                                                 |
| PDIG_47800 | 2.07 | 2.31 | PF05199,PF00732, | u_amine_oxid,Cu_a | domain,Copper amine oxidase, enzyme                                                                             | Primary amine oxidase                                                    |
| PDIG_05470 | 2.06 | 1.92 |                  | mine_oxidN3,      | domain,Copper amine oxidase, N3                                                                                 | Neutral amino acid permease                                              |
| PDIG_58210 | 2.05 | 2.26 | PF01979,         | Aa_trans,         | Transmembrane amino acid transporter                                                                            | hypothetical protein PDIP_57180                                          |
|            |      |      |                  | GMC_oxred_C,GMC   | protein,                                                                                                        | Naphthalene 1,2-dioxygenase                                              |
|            |      |      |                  | _oxred_N,         | GMC oxidoreductase,GMC                                                                                          | subunit alpha                                                            |
|            |      |      |                  | Amidohydro_1,     | oxidoreductase,                                                                                                 | Chlorohydrolase family protein                                           |

|            |      |      |                  |                     |                                                                         |                                                        |
|------------|------|------|------------------|---------------------|-------------------------------------------------------------------------|--------------------------------------------------------|
| PDIG_23250 | 2.05 | 2.58 |                  |                     |                                                                         | Pc13g06590 [Penicillium chrysogenum Wisconsin 54-1255] |
| PDIG_81860 | 2.04 | 3.03 | PF03561,         | Allantoicase,       | Allantoicase repeat,                                                    | hypothetical protein PDIG_81860                        |
| PDIG_76480 | 1.99 | 3.07 | PF00840,PF00734, | Glyco_hydro_7,CBM   | Glycosyl hydrolase family 7,Fungal                                      | 1,4-beta-D-glucan-cellobiohydrolyase, putative         |
| PDIG_71560 | 1.98 | 2.97 | PF12796,         | _1,                 | cellulose binding domain,                                               | hypothetical protein PDIP_80860                        |
|            |      |      |                  | Ank_2,              | Ankyrin repeats (3 copies),                                             |                                                        |
|            |      |      |                  |                     | Glutathione S-transferase, C-terminal domain,Glutathione S-transferase, |                                                        |
| PDIG_88030 | 1.95 | 1.67 | PF13410,PF13409, | GST_C_2,GST_N_2,    | N-terminal domain,                                                      | hypothetical protein PDIG_88030                        |
| PDIG_04480 | 1.94 | 2.18 | PF03959,         | FSH1,               | Serine hydrolase (FSH1),                                                | Dihydrofolate reductase                                |
| PDIG_42380 | 1.94 | 2.63 | PF17186,         | Lipocalin_9,        | Lipocalin-like domain,                                                  | hypothetical protein PDIG_42380                        |
| PDIG_20080 | 1.88 | 2.46 | PF01253,         | SUI1,               | Translation initiation factor SUI1,                                     | Pc20g07470 [Penicillium chrysogenum Wisconsin 54-1255] |
| PDIG_29700 | 1.87 | 4.03 |                  |                     |                                                                         | hypothetical protein PDIG_29700                        |
|            |      |      |                  |                     | Capsular polysaccharide synthesis                                       |                                                        |
| PDIG_91230 | 1.80 | 3.44 | PF05704,         | Caps_synth,         | protein,                                                                | hypothetical protein PDIG_91230                        |
| PDIG_35270 | 1.76 | 1.97 | PF00756,         | Esterase,           | Putative esterase,                                                      | Esterase, putative                                     |
| PDIG_23090 | 1.75 | 2.01 | PF13902,         | R3H-assoc,          | R3H-associated N-terminal domain,                                       | hypothetical protein PDIG_23090                        |
| PDIG_47730 | 1.74 | 5.83 |                  |                     |                                                                         | putative membrane protein                              |
|            |      |      |                  | Thioredoxin_6,Thior |                                                                         |                                                        |
| PDIG_47500 | 1.74 | 2.20 | PF13848,PF00085, | edoxin,             | Thioredoxin-like domain,Thioredoxin,                                    | Protein disulfide isomerase                            |
| PDIG_44860 | 1.73 | 2.27 |                  |                     |                                                                         | IgE binding protein, putative                          |
| PDIG_38960 | 1.69 | 2.55 |                  |                     |                                                                         | hypothetical protein PDIG_38960                        |
| PDIG_31400 | 1.59 | 1.82 | PF13561,         | adh_short_C2,       | Enoyl-(Acyl carrier protein) reductase,                                 | Carbonyl reductase, putative                           |
| PDIG_32650 | 1.59 | 2.33 | PF01680,         | SOR_SNZ,            | SOR/SNZ family,                                                         | Pyridoxine biosynthesis protein pyroA                  |

|            |      |      |                                      |                                         |                                                                             |                                                             |
|------------|------|------|--------------------------------------|-----------------------------------------|-----------------------------------------------------------------------------|-------------------------------------------------------------|
|            |      |      |                                      |                                         | impB/mucB/samB<br>family,impB/mucB/samB family<br>C-terminal                |                                                             |
| PDIG_87610 | 1.58 | 2.10 | PF00817,PF11799,<br>PF00200,PF13688, | IMS,IMS_C,Disinteg<br>rin,Reprolysin_5, | domain,Disintegrin,Metallo-peptidase<br>family M12,                         | hypothetical protein PDIG_87610                             |
| PDIG_22890 | 1.56 | 1.66 |                                      |                                         |                                                                             | hypothetical protein PDIG_22890                             |
| PDIG_39430 | 1.55 | 1.69 | PF13302,                             | Acetyltransf_3,                         | Acetyltransferase (GNAT) domain,                                            | Acetyltransferase                                           |
| PDIG_90070 | 1.54 | 2.33 |                                      |                                         |                                                                             | Acetyltransferase, GNAT family                              |
| PDIG_53390 | 1.53 | 1.87 | PF08881,                             | CVNH,                                   | CVNH domain,<br>Oxidoreductase family, NAD-binding                          | hypothetical protein PDIG_53390                             |
| PDIG_65670 | 1.50 | 1.86 | PF01408,                             | GFO_IDH_MocA,                           | Rossmann fold,                                                              | hypothetical protein PDIP_74990                             |
| PDIG_03380 | 1.47 | 1.65 | PF00544,                             | Pec_lyase_C,                            | Pectate lyase,                                                              | PL1 [Penicillium digitatum]<br>Ubiquitin conjugating enzyme |
| PDIG_09590 | 1.47 | 2.35 | PF00179,                             | UQ_con,                                 | Ubiquitin-conjugating enzyme,                                               | (UbcF), putative<br>ER membrane protein (Pkr1),<br>putative |
| PDIG_82530 | 1.46 | 1.90 | PF08636,                             | Pkr1,                                   | ER protein Pkr1,                                                            | putative                                                    |
| PDIG_26870 | 1.45 | 2.16 | PF08534,                             | Redoxin,                                | Redoxin,                                                                    | Allergen, putative                                          |
| PDIG_89020 | 1.45 | 2.23 | PF07047,                             | OPA3,                                   | Optic atrophy 3 protein (OPA3),<br>Pyridoxal-phosphate dependent<br>enzyme, | hypothetical protein PDIG_89020                             |
| PDIG_52870 | 1.44 | 1.61 | PF00291,                             | PALP,                                   |                                                                             | Cysteine synthase                                           |
| PDIG_20600 | 1.40 | 1.84 |                                      |                                         |                                                                             | hypothetical protein PDIG_20600                             |
| PDIG_81880 | 1.39 | 1.70 | PF07859,                             | Abhydrolase_3,                          | alpha/beta hydrolase fold,                                                  | Lipase/esterase, putative<br>S-adenosylmethionine-dependent |
| PDIG_62090 | 1.37 | 1.99 | PF13489,                             | Methyltransf_23,<br>Formyl_trans_N,AC   | Methyltransferase domain,                                                   | methyltransferase, putative<br>Formyltetrahydrofolate       |
| PDIG_76470 | 1.31 | 1.67 | PF00551,PF13740,                     | T_6,                                    | Formyl transferase,ACT domain,                                              | deformylase, putative                                       |



|            |      |      |                  |                                   |                                                                                                    |                                                                                  |
|------------|------|------|------------------|-----------------------------------|----------------------------------------------------------------------------------------------------|----------------------------------------------------------------------------------|
| PDIG_67250 | 1.28 | 1.73 | PF13302,         | Acetyltransf_3,                   | Acetyltransferase (GNAT) domain,                                                                   | Acetyltransferase, GNAT family                                                   |
| PDIG_67880 | 1.23 | 3.22 |                  |                                   |                                                                                                    | hypothetical protein PDIP_77180                                                  |
| PDIG_15430 | 1.22 | 1.97 | PF03061,PF01583, | 4HBT,APS_kinase,                  | Thioesterase<br>superfamily,Adenylylsulphate kinase,                                               | Adenylyl-sulfate kinase<br>[Penicillium digitatum Pd1]                           |
| PDIG_58330 | 1.21 | 2.08 | PF07716,         | bZIP_2,                           | Basic region leucine zipper,                                                                       | bZIP transcription factor (HacA),<br>putative [Neosartorya fischeri<br>NRRL 181] |
| PDIG_34930 | 1.20 | 1.98 |                  |                                   |                                                                                                    | hypothetical protein PDIP_54490                                                  |
| PDIG_50390 | 1.18 | 1.72 | PF01300,PF03481, | Sua5_yciO_yrdC,SU<br>A5,          | Telomere recombination,Putative<br>GTP-binding controlling<br>metal-binding,                       | Translation initiation protein Sua5                                              |
| PDIG_88120 | 1.12 | 1.74 | PF16653,PF03435, | Sacchrp_dh_C,Sacch<br>rp_dh_NADP, | Saccharopine dehydrogenase<br>C-terminal domain,Saccharopine<br>dehydrogenase NADP binding domain, | saccharopine reductase [Penicillium<br>chrysogenum]                              |
| PDIG_09380 | 1.12 | 5.77 | PF01786,         | AOX,                              | Alternative oxidase,                                                                               | Alternative oxidase                                                              |
| PDIG_68240 | 1.10 | 2.61 | PF00235,         | Profilin,                         | Profilin,                                                                                          | Profilin                                                                         |
