# Supplementary material for: Functional analysis of two sterol regulatory element binding proteins in Penicillium digitatum
Source: PubMed Central journal article supplement (PMC5415137; doi:10.1371/journal.pone.0176485), 2017-05-03
Supplement: pone.0176485.s010.pdf [file pone.0176485.s010.pdf]

**S6 Table. Annotation of genes uniquely regulated by *PdsreA***

| ID                                                            | log2FC in<br>$\Delta$ PdsreA | Pfam family | domain<br>name(abbreviation) | domain name                                        | nr_annotation                                             |
|---------------------------------------------------------------|------------------------------|-------------|------------------------------|----------------------------------------------------|-----------------------------------------------------------|
| 133 elements included exclusively in " $\Delta$ PdsreA-down": |                              |             |                              |                                                    |                                                           |
| PDIG_63570                                                    | -1.10                        | PF07690,    | MFS_1,                       | Major Facilitator Superfamily,                     | Pc18g02960 [Penicillium chrysogenum<br>Wisconsin 54-1255] |
| PDIG_71250                                                    | -1.10                        | PF00575,    | S1,                          | S1 RNA binding domain,                             | RRNA biogenesis protein RRP5, putative                    |
| PDIG_35230                                                    | -1.10                        |             |                              |                                                    | hypothetical protein PDIP_54780                           |
| PDIG_30110                                                    | -1.13                        | PF00428,    | Ribosomal_60s,               | 60s Acidic ribosomal protein,                      | 60S acidic ribosomal protein P2                           |
| PDIG_71520                                                    | -1.13                        | PF00583,    | Acetyltransf_1,              | Acetyltransferase (GNAT) family,                   | hypothetical protein PDIP_80820                           |
|                                                               |                              | PF00743,PF0 | FMO-like,Fungal_t            | Flavin-binding monooxygenase-like,Fungal specific  |                                                           |
| PDIG_84040                                                    | -1.14                        | 4082,       | rans,                        | transcription factor domain,                       | Fungal specific transcription factor, putative            |
|                                                               |                              | PF00636,PF0 | Ribonuclease_3,Dic           |                                                    |                                                           |
| PDIG_68480                                                    | -1.15                        | 3368,       | er_dimer,                    | Ribonuclease III domain,Dicer dimerisation domain, | Dicer-like protein 2                                      |
|                                                               |                              | PF16198,PF0 |                              | tRNA pseudouridylate synthase B C-terminal         |                                                           |
|                                                               |                              | 1472,PF0150 | TruB_C_2,PUA,Tr              | domain,PUA domain,TruB family pseudouridylate      |                                                           |
|                                                               |                              | 9,PF04511,P | uB_N,DER1,DKCL               | synthase (N terminal domain),Der1-like             |                                                           |
| PDIG_84710                                                    | -1.15                        | F08068,     | D,                           | family,DKCLD (NUC011) domain,                      | Centromere/microtubule-binding protein CBF5               |
|                                                               |                              | PF08327,PF0 |                              | Activator of Hsp90 ATPase homolog 1-like           | Pc22g05790 [Penicillium chrysogenum                       |
| PDIG_88130                                                    | -1.15                        | 9229,       | AHSA1,Aha1_N,                | protein,Activator of Hsp90 ATPase, N-terminal,     | Wisconsin 54-1255]                                        |
|                                                               |                              | PF05178,PF1 |                              |                                                    |                                                           |
| PDIG_64000                                                    | -1.16                        | 2936,       | Kri1,Kri1_C,                 | KRI1-like family,KRI1-like family C-terminal,      | Ribosome biogenesis protein Kri1                          |
| PDIG_15640                                                    | -1.18                        | PF11951,    | Fungal_trans_2,              | Fungal specific transcription factor domain,       | hypothetical protein PDIG_15640                           |
|                                                               |                              | PF00043,PF0 |                              | Glutathione S-transferase, C-terminal              | Translation elongation factor eEF-1B gamma                |
| PDIG_07260                                                    | -1.18                        | 2798,       | GST_C,GST_N,                 | domain,Glutathione S-transferase, N-terminal       | subunit, putative                                         |

|            |       |                  |                                      |                                                                                                                                           |                                                                                                            |
|------------|-------|------------------|--------------------------------------|-------------------------------------------------------------------------------------------------------------------------------------------|------------------------------------------------------------------------------------------------------------|
| PDIG_89420 | -1.19 | PF08238,         | Sel1,                                | domain,<br>Sel1 repeat,                                                                                                                   | hypothetical protein PDIG_89420<br>malate dehydrogenase                                                    |
| PDIG_12570 | -1.19 | PF03949,PF0390,  | Malic_M,malic,                       | Malic enzyme, NAD binding domain, Malic enzyme,<br>N-terminal domain,                                                                     | (oxaloacetate-decarboxylating) [Exophiala dermatitidis NIH/UT8656]                                         |
| PDIG_84990 | -1.20 |                  |                                      |                                                                                                                                           | Protein kinase                                                                                             |
| PDIG_57320 | -1.21 | PF01269,         | Fibrillarin,                         | Fibrillarin,                                                                                                                              | Fibrillarin, putative                                                                                      |
| PDIG_78490 | -1.21 | PF04588,         | HIG_1_N,                             | Hypoxia induced protein conserved region,                                                                                                 | hypothetical protein PDIG_78490                                                                            |
| PDIG_02290 | -1.21 | PF08241,         | Methyltransf_11,                     | Methyltransferase domain,                                                                                                                 | hypothetical protein PDIG_02290                                                                            |
| PDIG_56300 | -1.22 | PF13561,         | adh_short_C2,                        | Enoyl-(Acyl carrier protein) reductase,                                                                                                   | hypothetical protein PDIP_65860                                                                            |
| PDIG_39900 | -1.23 |                  |                                      |                                                                                                                                           | Mitochondrial distribution and morphology<br>protein 34                                                    |
| PDIG_13640 | -1.24 | PF17125,PF01189, | Methyltr_RsmF_N,<br>Methyltr_RsmB-F, | N-terminal domain of 16S rRNA methyltransferase<br>RsmF, 16S rRNA methyltransferase RsmB/F,<br>Cyclophilin type peptidyl-prolyl cis-trans | Nucleolar RNA methyltransferase (Nop2),<br>putative                                                        |
| PDIG_91030 | -1.25 | PF00160,         | Pro_isomerase,                       | isomerase/CLD,                                                                                                                            | Peptidyl-prolyl cis-trans isomerase D                                                                      |
| PDIG_70480 | -1.26 | PF02780,PF02779, | Transketolase_C,Tr<br>ansket_pyr,    | Transketolase, C-terminal domain, Transketolase,<br>pyrimidine binding domain,<br>Poly(ADP-ribose) polymerase and DNA-Ligase              | 3-methyl-2-oxobutanoate dehydrogenase,<br>putative<br>PARP-type zinc finger-containing protein<br>C2A9.07c |
| PDIG_20950 | -1.27 | PF00645,         | zf-PARP,                             | Zn-finger region,                                                                                                                         | hypothetical protein PDIP_56570                                                                            |
| PDIG_18740 | -1.27 |                  |                                      |                                                                                                                                           | Pc22g03140 [Penicillium chrysogenum<br>Wisconsin 54-1255]                                                  |
| PDIG_73920 | -1.27 | PF00400,         | WD40,                                | WD domain, G-beta repeat,                                                                                                                 |                                                                                                            |
| PDIG_54410 | -1.28 | PF00650,PF03765, | CRAL_TRIO,CRA<br>L_TRIO_N,           | CRAL/TRIO domain, CRAL/TRIO, N-terminal<br>domain,                                                                                        | Phosphatidylinositol transporter, putative                                                                 |
| PDIG_47330 | -1.28 | PF00583,         | Acetyltransf_1,                      | Acetyltransferase (GNAT) family,                                                                                                          | Acetyltransferase, GNAT family                                                                             |

|            |       |             |                 |                                                |                                                                 |
|------------|-------|-------------|-----------------|------------------------------------------------|-----------------------------------------------------------------|
| PDIG_12760 | -1.29 | PF00166,    | Cpn10,          | Chaperonin 10 Kd subunit,                      | Chaperonin, putative                                            |
| PDIG_04330 | -1.29 | PF01965,    | DJ-1_PfpI,      | DJ-1/PfpI family,                              | ThiJ/PfpI family protein                                        |
| PDIG_31790 | -1.30 | PF01039,    | Carboxyl_trans, | Carboxyl transferase domain,                   | 3-methylcrotonyl-CoA carboxylase, beta subunit (McCb), putative |
|            |       | PF13409,PF1 | GST_N_2,GST_C_  | domain,Glutathione S-transferase, N-terminal   |                                                                 |
| PDIG_39040 | -1.30 | 3410,       | 2,              | domain,                                        | hypothetical protein PDIG_39040                                 |
| PDIG_56530 | -1.30 | PF01207,    | Dus,            | Dihydrouridine synthase (Dus),                 | tRNA dihydrouridine synthase, putative                          |
| PDIG_77380 | -1.32 | PF13561,    | adh_short_C2,   | Enoyl-(Acyl carrier protein) reductase,        | Sorbitol/xylulose reductase Sou1-like, putative                 |
| PDIG_47770 | -1.33 |             |                 |                                                | hypothetical protein PDIG_47770                                 |
| PDIG_17540 | -1.33 | PF10277,    | Frag1,          | Frag1/DRAM/Sfk1 family,                        | FK506 suppressor Sfk1, putative                                 |
| PDIG_76930 | -1.33 | PF11951,    | Fungal_trans_2, | Fungal specific transcription factor domain,   | hypothetical protein PDIG_76930                                 |
| PDIG_40060 | -1.34 | PF00266,    | Aminotran_5,    | Aminotransferase class-V,                      | Kynureninase                                                    |
| PDIG_03890 | -1.34 | PF00561,    | Abhydrolase_1,  | alpha/beta hydrolase fold,                     | Pc20g03890 [Penicillium chrysogenum Wisconsin 54-1255]          |
|            |       |             |                 | ATPase family associated with various cellular |                                                                 |
| PDIG_22360 | -1.34 | PF00004,    | AAA,            | activities (AAA),                              | AAA family ATPase, putative                                     |
|            |       |             |                 |                                                | 2-oxoisovalerate dehydrogenase complex                          |
| PDIG_08090 | -1.38 | PF00676,    | E1_dh,          | Dehydrogenase E1 component,                    | alpha subunit, putative                                         |
| PDIG_43630 | -1.39 | PF00107,    | ADH_zinc_N,     | Zinc-binding dehydrogenase,                    | Alcohol dehydrogenase, putative                                 |
| PDIG_64350 | -1.39 |             |                 |                                                | hypothetical protein PDIP_73690                                 |
|            |       | PF05712,PF1 |                 | MRG,RNA binding activity-knot of a             |                                                                 |
| PDIG_87000 | -1.39 | 1717,       | MRG,Tudor-knot, | chromodomain,                                  | Histone acetylase complex subunit MRG15-2                       |
| PDIG_64130 | -1.40 | PF00172,    | Zn_clus,        | Fungal Zn(2)-Cys(6) binuclear cluster domain,  | hypothetical protein PDIP_73480                                 |
| PDIG_56750 | -1.41 | PF00400,    | WD40,           | WD domain, G-beta repeat,                      | WD repeat protein                                               |
| PDIG_20110 | -1.41 |             |                 |                                                | hypothetical protein PDIG_20110                                 |

|            |       |                                        |                                                    |                                                                                                       |                                                                                                                     |
|------------|-------|----------------------------------------|----------------------------------------------------|-------------------------------------------------------------------------------------------------------|---------------------------------------------------------------------------------------------------------------------|
| PDIG_55550 | -1.41 | PF13434,                               | K_oxygenase,                                       | L-lysine 6-monooxygenase (NADPH-requiring),<br>FGGY family of carbohydrate kinases, C-terminal        | L-ornithine N5 monooxygenase                                                                                        |
| PDIG_22490 | -1.42 | PF02782,PF0<br>0370,                   | FGGY_C,FGGY_N<br>,                                 | domain,FGGY family of carbohydrate kinases,<br>N-terminal domain,                                     | FGGY-family carbohydrate kinase, putative                                                                           |
| PDIG_55470 | -1.42 | PF00291,PF0<br>0571,                   | PALP,CBS,                                          | Pyridoxal-phosphate dependent enzyme,CBS<br>domain,                                                   | Cystathionine beta-synthase, putative                                                                               |
| PDIG_11700 | -1.42 |                                        |                                                    |                                                                                                       | hypothetical protein PDIG_11700                                                                                     |
| PDIG_61640 | -1.43 | PF01246,                               | Ribosomal_L24e,                                    | Ribosomal protein L24e,                                                                               | hypothetical protein PDIP_71070                                                                                     |
| PDIG_63620 | -1.43 | PF01474,<br>PF01798,PF0                | DAHP_synth_2,                                      | Class-II DAHP synthetase family,<br>snoRNA binding domain, fibrillar, NOP5NT                          | Phospho-2-dehydro-3-deoxyheptonate<br>aldolase, class II<br>Pre-rRNA processing nucleolar protein Sik1,<br>putative |
| PDIG_66810 | -1.43 | 8156,                                  | Nop,NOP5NT,                                        | (NUC127) domain,                                                                                      | hypothetical protein PDIP_57560                                                                                     |
| PDIG_48180 | -1.44 |                                        |                                                    |                                                                                                       | NADH-ubiquinone oxidoreductase 9.5 kDa<br>subunit, putative                                                         |
| PDIG_55000 | -1.44 |                                        | U3_snoRNA_assoc                                    |                                                                                                       |                                                                                                                     |
| PDIG_83990 | -1.45 | PF08297,                               | ,                                                  | U3 snoRNA associated,                                                                                 | hypothetical protein PDIP_89480                                                                                     |
| PDIG_61240 | -1.46 |                                        |                                                    |                                                                                                       | hypothetical protein PDIG_61240                                                                                     |
| PDIG_75870 | -1.46 |                                        |                                                    |                                                                                                       | hypothetical protein PDIG_75870                                                                                     |
| PDIG_59730 | -1.48 | PF04427,<br>PF00364,PF0<br>2817,PF0019 | Brix,<br>Biotin_lipoyl,E3_bi<br>nding,2-oxoacid_dh | Brix domain,<br>Biotin-requiring enzyme,e3 binding<br>domain,2-oxoacid dehydrogenases acyltransferase | hypothetical protein PDIP_69150<br>Biotin-dependent 2-oxo acid dehydrogenases<br>acyltransferase, putative          |
| PDIG_41170 | -1.48 | 8,                                     | ,                                                  | (catalytic domain),                                                                                   |                                                                                                                     |
| PDIG_11360 | -1.48 | PF11274,                               | DUF3074,                                           | Protein of unknown function (DUF3074),                                                                | hypothetical protein PDIP_82860                                                                                     |
| PDIG_27920 | -1.49 | PF00463,                               | ICL,                                               | Isocitrate lyase family,                                                                              | Isocitrate lyase                                                                                                    |
| PDIG_03200 | -1.49 | PF00625,                               | Guanylate_kin,                                     | Guanylate kinase,                                                                                     | Guanylate kinase                                                                                                    |

|            |       |                  |                                 |                                                                                                              |                                                                                |
|------------|-------|------------------|---------------------------------|--------------------------------------------------------------------------------------------------------------|--------------------------------------------------------------------------------|
| PDIG_36830 | -1.50 | PF10329,         | DUF2417,                        | Region of unknown function (DUF2417),                                                                        | Mitochondrial integral membrane protein                                        |
| PDIG_24330 | -1.51 |                  |                                 |                                                                                                              | hypothetical protein PDIP_58810                                                |
| PDIG_75310 | -1.52 | PF01172,         | SBDS,                           | Shwachman-Bodian-Diamond syndrome (SBDS) protein,                                                            | RNA binding protein, putative                                                  |
| PDIG_66090 | -1.54 |                  |                                 |                                                                                                              | hypothetical protein PDIP_75390                                                |
| PDIG_04810 | -1.54 | PF08883,         | DOPA_dioxygen,                  | Dopa 4,5-dioxygenase family,                                                                                 | hypothetical protein PDIG_04810                                                |
| PDIG_07850 | -1.55 |                  |                                 |                                                                                                              | hypothetical protein PDIP_35890                                                |
| PDIG_23700 | -1.56 | PF00288,PF08544, | GHMP_kinases_N, GHMP_kinases_C, | GHMP kinases N terminal domain, GHMP kinases C terminal,                                                     | Mevalonate kinase                                                              |
| PDIG_58300 | -1.58 | PF01144,         | CoA_trans,                      | Coenzyme A transferase,                                                                                      | succinyl-CoA:3-ketoacid-coenzyme A transferase [Neosartorya fischeri NRRL 181] |
| PDIG_23460 | -1.59 | PF00725,PF02737, | 3HCDH,3HCDH_N,                  | 3-hydroxyacyl-CoA dehydrogenase, C-terminal domain, 3-hydroxyacyl-CoA dehydrogenase, NAD binding domain,     | 3-hydroxybutyryl-CoA dehydrogenase, putative                                   |
| PDIG_41570 | -1.60 |                  |                                 |                                                                                                              | hypothetical protein PDIG_41570                                                |
| PDIG_72980 | -1.60 | PF00153,         | Mito_carr,                      | Mitochondrial carrier protein,                                                                               | Mitochondrial carrier protein, putative                                        |
| PDIG_22380 | -1.63 |                  |                                 |                                                                                                              | hypothetical protein PDIG_22380                                                |
| PDIG_56320 | -1.64 |                  |                                 |                                                                                                              | hypothetical protein PDIP_65880                                                |
| PDIG_78890 | -1.64 | PF00549,PF00755, | Ligase_CoA,Carn_acyltransf,     | CoA-ligase, Choline/Carnitine o-acyltransferase,                                                             | Carnitine acetyl transferase                                                   |
| PDIG_53050 | -1.65 |                  |                                 |                                                                                                              | hypothetical protein PDIG_53050                                                |
| PDIG_29290 | -1.66 | PF00378,         | ECH_1,                          | Enoyl-CoA hydratase/isomerase,                                                                               | Enoyl-CoA hydratase/isomerase family protein                                   |
| PDIG_44310 | -1.67 | PF00205,PF02775, | TPP_enzyme_M,T PP_enzyme_C,     | Thiamine pyrophosphate enzyme, central domain, Thiamine pyrophosphate enzyme, C-terminal TPP binding domain, | acetolactate synthase [Aspergillus oryzae RIB40]                               |
| PDIG_55650 | -1.67 |                  |                                 |                                                                                                              | hypothetical protein PDIG_55650                                                |

|            |       |                        |                                                    |                                                                                                                                  |                                                                                                  |
|------------|-------|------------------------|----------------------------------------------------|----------------------------------------------------------------------------------------------------------------------------------|--------------------------------------------------------------------------------------------------|
|            |       | PF02771,PF00441,PF0277 | Acyl-CoA_dh_N,A<br>cyl-CoA_dh_1,Acy<br>l-CoA_dh_M, | Acyl-CoA dehydrogenase, N-terminal<br>domain,Acyl-CoA dehydrogenase, C-terminal<br>domain,Acyl-CoA dehydrogenase, middle domain, | Isovaleryl-CoA dehydrogenase IvdA, putative<br>Homogentisate 1,2-dioxygenase (HmgA),<br>putative |
| PDIG_31800 | -1.67 | 0,                     |                                                    |                                                                                                                                  |                                                                                                  |
| PDIG_08310 | -1.70 | PF04209,               | HgmA,                                              | homogentisate 1,2-dioxygenase,                                                                                                   |                                                                                                  |
| PDIG_31050 | -1.72 | PF01161,               | PBP,                                               | Phosphatidylethanolamine-binding protein,<br>Iron/manganese superoxide dismutases, alpha-hairpin                                 | Protease inhibitor (Tfs1), putative                                                              |
|            |       | PF00081,PF02777,       | Sod_Fe_N,Sod_Fe_<br>C,                             | domain,Iron/manganese superoxide dismutases,<br>C-terminal domain,                                                               | Superoxide dismutase                                                                             |
| PDIG_56920 | -1.73 |                        |                                                    |                                                                                                                                  |                                                                                                  |
|            |       | PF01557,PF09298,       | FAA_hydrolase,FA<br>A_hydrolase_N,                 | Fumarylacetoacetate (FAA) hydrolase<br>family,Fumarylacetoacetase N-terminal,                                                    | Fumarylacetoacetate hydrolase FahA                                                               |
| PDIG_08300 | -1.74 |                        |                                                    |                                                                                                                                  |                                                                                                  |
| PDIG_70470 | -1.74 | PF05368,               | NmrA,                                              | NmrA-like family,                                                                                                                | Isoflavone reductase, putative                                                                   |
| PDIG_07390 | -1.78 |                        |                                                    |                                                                                                                                  | hypothetical protein PDIG_07390                                                                  |
|            |       | PF01556,PF00226,PF0068 | DnaJ_C,DnaJ,DnaJ<br>_CXXCXGXG,                     | DnaJ C terminal domain,DnaJ domain,DnaJ central<br>domain,                                                                       | hypothetical protein PDIP_80330<br>hypothetical protein PDIG_45050                               |
| PDIG_71010 | -1.79 | 4,                     |                                                    |                                                                                                                                  |                                                                                                  |
| PDIG_08080 | -1.80 |                        |                                                    |                                                                                                                                  |                                                                                                  |
|            |       | PF14529,PF00078,PF0007 | Exo_endo_phos_2,<br>RVT_1,RNase_H,                 | Endonuclease-reverse transcriptase,Reverse<br>transcriptase (RNA-dependent DNA<br>polymerase),RNase H,                           | hypothetical protein PDIG_45050                                                                  |
| PDIG_45050 | -1.80 | 5,                     |                                                    |                                                                                                                                  |                                                                                                  |
| PDIG_24510 | -1.81 | PF03239,               | FTR1,                                              | Iron permease FTR1 family,                                                                                                       | Plasma membrane iron permease                                                                    |
| PDIG_57140 | -1.81 | PF13489,               | Methyltransf_23,                                   | Methyltransferase domain,                                                                                                        | hypothetical protein PDIP_66680                                                                  |
| PDIG_12190 | -1.82 |                        |                                                    |                                                                                                                                  | hypothetical protein PDIP_38410                                                                  |
| PDIG_78090 | -1.85 | PF04427,               | Brix,                                              | Brix domain,                                                                                                                     | Imp4 protein, putative                                                                           |
|            |       | PF13236,PF13374,PF1280 | CLU,TPR_10,eIF3<br>_p135,TPR_12,CL                 | Clustered mitochondria,Tetratricopeptide<br>repeat,Translation initiation factor eIF3 subunit                                    | hypothetical protein PDIP_74790                                                                  |
| PDIG_65470 | -1.86 |                        |                                                    |                                                                                                                                  |                                                                                                  |

|            |       |                        |                    |                                                                     |                                              |
|------------|-------|------------------------|--------------------|---------------------------------------------------------------------|----------------------------------------------|
|            |       | 7,PF13424,P<br>F15044, | U_N,               | 135,Tetratricopeptide repeat,Mitochondrial function,<br>CLU-N-term, |                                              |
| PDIG_77450 | -1.88 | PF11700,               | ATG22,             | Vacuole effluxer Atg22 like,                                        | hypothetical protein PDIG_77450              |
| PDIG_38170 | -1.88 | PF13418,               | Kelch_4,           | Galactose oxidase, central domain,                                  | Kelch repeat protein                         |
|            |       | PF00108,PF0            | Thiolase_N,Thiolas | Thiolase, N-terminal domain,Thiolase, C-terminal                    |                                              |
| PDIG_02770 | -1.89 | 2803,                  | e_C,               | domain,                                                             | Sterol carrier protein, putative             |
|            |       | PF13561,PF0            | adh_short_C2,AAT   | Enoyl-(Acyl carrier protein) reductase,Alcohol                      | hypothetical protein PDIP_17280 [Penicillium |
| PDIG_45340 | -1.91 | 7247,                  | ase,               | acetyltransferase,                                                  | digitatum Pd1]                               |
| PDIG_83000 | -1.93 | PF07081,               | DUF1349,           | Protein of unknown function (DUF1349),                              | hypothetical protein PDIP_86790              |
| PDIG_60520 | -1.99 |                        |                    |                                                                     | hypothetical protein PDIP_69930              |
| PDIG_27670 | -1.99 | PF00067,               | p450,              | Cytochrome P450,                                                    | Cytochrome P450 monooxygenase, putative      |
| PDIG_03260 | -1.99 | PF00403,               | HMA,               | Heavy-metal-associated domain,                                      | hypothetical protein PDIP_41920              |
| PDIG_32310 | -2.02 |                        |                    |                                                                     | hypothetical protein PDIP_51900              |
| PDIG_51810 | -2.06 | PF04622,               | ERG2_Sigma1R,      | ERG2 and Sigma1 receptor like protein,                              | C-8 sterol isomerase (Erg-1), putative       |
| PDIG_75680 | -2.07 |                        |                    |                                                                     | hypothetical protein PDIG_75680              |
|            |       |                        |                    | Complex I intermediate-associated protein 30                        |                                              |
| PDIG_20140 | -2.12 | PF08547,               | CIA30,             | (CIA30),                                                            | hypothetical protein PDIG_20140              |
|            |       | PF14683,PF1            |                    | Polysaccharide lyase family 4, domain                               |                                              |
| PDIG_07340 | -2.16 | 4686,                  | CBM-like,fn3_3,    | III,Polysaccharide lyase family 4, domain II,                       | hypothetical protein PDIG_07340              |
| PDIG_00260 | -2.18 |                        |                    |                                                                     | hypothetical protein PDIG_00260              |
| PDIG_57550 | -2.20 |                        |                    |                                                                     | hypothetical protein PDIP_67060              |
| PDIG_25230 | -2.21 |                        |                    |                                                                     | hypothetical protein PDIP_59720              |
|            |       | PF01425,PF0            |                    |                                                                     |                                              |
| PDIG_56950 | -2.23 | 0106,                  | Amidase,adh_short, | Amidase,short chain dehydrogenase,                                  | General amidase, putative                    |
|            |       |                        |                    |                                                                     | 2,4-dihydroxyhept-2-ene-1,7-dioic acid       |
| PDIG_53070 | -2.26 | PF03328,               | HpcH_HpaI,         | HpcH/HpaI aldolase/citrate lyase family,                            | aldolase                                     |

|            |       |                          |                                            |                                                                                                       |                                                                                                     |
|------------|-------|--------------------------|--------------------------------------------|-------------------------------------------------------------------------------------------------------|-----------------------------------------------------------------------------------------------------|
| PDIG_83260 | -2.27 | PF05063,                 | MT-A70,                                    | MT-A70,                                                                                               | MT-A70 family                                                                                       |
| PDIG_42220 | -2.32 |                          |                                            |                                                                                                       | hypothetical protein PDIG_42220                                                                     |
| PDIG_29970 | -2.36 | PF08538,                 | DUF1749,                                   | Protein of unknown function (DUF1749),                                                                | Siderophore biosynthesis lipase/esterase, putative                                                  |
| PDIG_84380 | -2.36 | PF08570,                 | DUF1761,                                   | Protein of unknown function (DUF1761),                                                                | hypothetical protein PDIG_84380                                                                     |
| PDIG_69650 | -2.37 |                          |                                            |                                                                                                       | hypothetical protein PDIP_78940                                                                     |
| PDIG_62940 | -2.38 |                          |                                            |                                                                                                       | hypothetical protein PDIP_72320                                                                     |
| PDIG_18400 | -2.42 | PF07992,PF0355,          | Pyr_redox_2,Rieske,                        | Pyridine nucleotide-disulphide oxidoreductase,Rieske [2Fe-2S] domain,                                 | AIF-like mitochondrial oxidoreductase (Nfr1), putative                                              |
| PDIG_13300 | -2.43 | PF14033,                 | DUF4246,                                   | Protein of unknown function (DUF4246),                                                                | hypothetical protein PDIP_40440                                                                     |
| PDIG_38270 | -2.56 |                          |                                            |                                                                                                       | hypothetical protein PDIG_38270                                                                     |
| PDIG_24500 | -2.58 | PF01794,PF08022,PF08030, | Ferric_reduct,FAD_binding_8,NAD_binding_6, | Ferric reductase like transmembrane component,FAD-binding domain,Ferric reductase NAD binding domain, | Ferric reductase transmembrane component 5, putative siderochrome-iron transporter (Sit1), putative |
| PDIG_38260 | -2.59 | PF07690,                 | MFS_1,                                     | Major Facilitator Superfamily,                                                                        | [Aspergillus clavatus NRRL 1]                                                                       |
| PDIG_53850 | -2.73 |                          |                                            |                                                                                                       | hypothetical protein PDIG_53850                                                                     |
| PDIG_46910 | -3.19 | PF04116,                 | FA_hydroxylase,                            | Fatty acid hydroxylase superfamily,                                                                   | Sterol delta 5,6-desaturase ERG3                                                                    |
| PDIG_22330 | -3.21 | PF04116,                 | FA_hydroxylase,                            | Fatty acid hydroxylase superfamily,                                                                   | C-4 methyl sterol oxidase Erg25, putative                                                           |
| PDIG_77480 | -3.31 | PF00172,                 | Zn_clus,                                   | Fungal Zn(2)-Cys(6) binuclear cluster domain,                                                         | hypothetical protein PDIG_77480                                                                     |
| PDIG_90350 | -3.67 | PF01284,                 | MARVEL,                                    | Membrane-associating domain,                                                                          | Non-classical export protein, putative                                                              |
| PDIG_71130 | -3.68 |                          |                                            |                                                                                                       | hypothetical protein PDIG_71130                                                                     |
| PDIG_90150 | -9.40 | PF00010,PF09427,         | HLH,DUF2014,                               | Helix-loop-helix DNA-binding domain,Domain of unknown function (DUF2014),                             | HLH transcription factor, putative                                                                  |
|            |       |                          |                                            |                                                                                                       | 259 elements included exclusively in "ΔPdsreA-up":                                                  |
| PDIG_03030 | 6.30  | PF11951,                 | Fungal_trans_2,                            | Fungal specific transcription factor domain,                                                          | hypothetical protein PDIG_15640                                                                     |



|            |      |             |                      |                                                     |                                                     |
|------------|------|-------------|----------------------|-----------------------------------------------------|-----------------------------------------------------|
| PDIG_87530 | 4.36 |             |                      |                                                     | hypothetical protein PDIG_87530                     |
|            |      | PF00199,PF0 | Catalase,Catalase-re |                                                     |                                                     |
| PDIG_58090 | 4.10 | 6628,       | 1,                   | Catalase,Catalase-related immune-responsive,        | Catalase B                                          |
|            |      | PF14310,PF0 | Fn3-like,Glyco_hyd   | Fibronectin type III-like domain,Glycosyl hydrolase |                                                     |
|            |      | 0933,PF0191 | ro_3,Glyco_hydro_    | family 3 N terminal domain,Glycosyl hydrolase       |                                                     |
| PDIG_33090 | 4.09 | 5,          | 3_C,                 | family 3 C-terminal domain,                         | putative beta-glucosidase G                         |
| PDIG_60730 | 3.78 | PF00171,    | Aldedh,              | Aldehyde dehydrogenase family,                      | hypothetical protein PDIP_70160                     |
|            |      |             |                      |                                                     | Arabinogalactan endo-1,4-beta-galactosidase         |
| PDIG_59450 | 3.47 | PF07745,    | Glyco_hydro_53,      | Glycosyl hydrolase family 53,                       | GalA                                                |
| PDIG_64230 | 3.28 |             |                      |                                                     | hypothetical protein PDIP_73570                     |
| PDIG_87780 | 3.24 |             |                      |                                                     | hypothetical protein PDIG_87780                     |
| PDIG_49820 | 3.15 |             |                      |                                                     | hypothetical protein PDIG_49820                     |
| PDIG_44800 | 3.01 | PF00083,    | Sugar_tr,            | Sugar (and other) transporter,                      | MFS monosaccharide transporter, putative            |
|            |      |             |                      |                                                     | GABA permease [ <i>Aspergillus fumigatus</i> Af293] |
| PDIG_25750 | 2.97 |             |                      |                                                     |                                                     |
| PDIG_14830 | 2.93 | PF01095,    | Pectinesterase,      | Pectinesterase,                                     | hypothetical protein PDIG_14830                     |
| PDIG_60760 | 2.91 | PF01619,    | Pro_dh,              | Proline dehydrogenase,                              | Pyrroline-5-carboxylate reductase                   |
|            |      | PF03442,PF0 | CBM_X2,Cellulase     | Carbohydrate binding domain X2,Cellulase (glycosyl  |                                                     |
| PDIG_13580 | 2.90 | 0150,       | ,                    | hydrolase family 5),                                | Extracellular endoglucanase, putative               |
| PDIG_13830 | 2.88 |             |                      |                                                     | hypothetical protein PDIP_39480                     |
| PDIG_37780 | 2.84 | PF00324,    | AA_permease,         | Amino acid permease,                                | Amino acid permease (Dip5), putative                |
| PDIG_84890 | 2.83 |             |                      |                                                     | hypothetical protein PDIG_84890                     |
| PDIG_87750 | 2.69 | PF01212,    | Beta_elim_lyase,     | Beta-eliminating lyase,                             | Threonine aldolase, putative                        |
| PDIG_44930 | 2.62 | PF07519,    | Tannase,             | Tannase and feruloyl esterase,                      | hypothetical protein PDIG_44930                     |
| PDIG_32690 | 2.58 | PF03330,    | DPBB_1,              | Lytic transglycolase,                               | Expansin-like protein 1                             |
| PDIG_26800 | 2.57 | PF06912,    | DUF1275,             | Protein of unknown function (DUF1275),              | hypothetical protein PDIP_61250                     |

|            |      |                                |                                                                            |                                                                                          |                                                             |
|------------|------|--------------------------------|----------------------------------------------------------------------------|------------------------------------------------------------------------------------------|-------------------------------------------------------------|
| PDIG_81120 | 2.54 | PF02133,                       | Transp_cyt_pur,                                                            | Permease for cytosine/purines, uracil, thiamine, allantoin,                              | hypothetical protein PDIG_81120                             |
| PDIG_45070 | 2.53 | PF00295,                       | Glyco_hydro_28,                                                            | Glycosyl hydrolases family 28,                                                           | Polygalacturonase-2                                         |
| PDIG_03860 | 2.52 | PF04488,                       | Gly_transf_sug,                                                            | Glycosyltransferase sugar-binding region containing DXD motif,                           | hypothetical protein PDIG_03860                             |
| PDIG_60740 | 2.47 |                                |                                                                            |                                                                                          | hypothetical protein PDIP_70170                             |
| PDIG_81130 | 2.43 | PF02133,                       | Transp_cyt_pur,                                                            | Permease for cytosine/purines, uracil, thiamine, allantoin,                              | hypothetical protein PDIG_81130                             |
| PDIG_49470 | 2.40 | PF00282,                       | Pyridoxal_deC,                                                             | Pyridoxal-dependent decarboxylase conserved domain,                                      | hypothetical protein PDIG_49470                             |
| PDIG_13650 | 2.40 | PF00443,PF13920,PF02493,       | UCH,zf-C3HC4_3,MORN,                                                       | Ubiquitin carboxyl-terminal hydrolase,Zinc finger, C3HC4 type (RING finger),MORN repeat, | putative MATH and UCH domain protein                        |
| PDIG_51040 | 2.40 | PF16815,PF06422,PF00005,PF1451 | HRI1,PDR_CDR,ABC_transporter,ABC_transporter,ABC_transporter extracellular | Protein HRI1, CDR ABC transporter,ABC transporter,ABC-transporter extracellular          | hypothetical protein PDIG_51040                             |
| PDIG_34250 | 2.38 | PF01061,                       | BC2_membrane,                                                              | N-terminal,ABC-2 type transporter,                                                       | ABC transporter, putative                                   |
| PDIG_17100 | 2.37 | PF00083,                       | Sugar_tr,                                                                  | Sugar (and other) transporter,                                                           | MFS monosaccharide transporter, putative                    |
| PDIG_67790 | 2.35 | PF13520,                       | AA_permease_2,                                                             | Amino acid permease,                                                                     | hypothetical protein PDIP_77100                             |
| PDIG_50110 | 2.31 | PF00857,                       | Isochorismatase,                                                           | Isochorismatase family,                                                                  | Isochorismatase family protein                              |
| PDIG_89860 | 2.28 | PF13520,                       | AA_permease_2,                                                             | Amino acid permease,                                                                     | hypothetical protein PDIG_89860                             |
| PDIG_68670 | 2.28 | PF00232,                       | Glyco_hydro_1,                                                             | Glycosyl hydrolase family 1,                                                             | Beta-glucosidase                                            |
| PDIG_15120 | 2.26 |                                |                                                                            |                                                                                          | hypothetical protein PDIG_15120                             |
| PDIG_54580 | 2.24 |                                |                                                                            |                                                                                          | hypothetical protein PDIG_54580                             |
| PDIG_31500 | 2.21 | PF09362,                       | DUF1996,                                                                   | Domain of unknown function (DUF1996),                                                    | hypothetical protein PDIP_51080 [Penicillium digitatum Pd1] |

|            |      |                        |                                         |                                                                                                                                                                                                         |                                                       |
|------------|------|------------------------|-----------------------------------------|---------------------------------------------------------------------------------------------------------------------------------------------------------------------------------------------------------|-------------------------------------------------------|
| PDIG_83190 | 2.20 | PF00152,PF01336,       | tRNA-synt_2,tRNA_anti-codon,            | tRNA synthetases class II (D, K and N),OB-fold nucleic acid binding domain,                                                                                                                             | Cytoplasmic asparaginyl-tRNA synthetase, putative     |
| PDIG_00570 | 2.19 | PF10282,               | Lactonase,                              | Lactonase, 7-bladed beta-propeller, Glycine cleavage T-protein C-terminal barrel domain,Aminomethyltransferase folate-binding domain,                                                                   | hypothetical protein PDIG_00570                       |
| PDIG_15490 | 2.19 | PF08669,PF01571,       | GCV_T_C,GCV_T,                          | domain,                                                                                                                                                                                                 | Aminomethyltransferase                                |
| PDIG_29560 | 2.11 | PF04371,               | PAD_porph,                              | Porphyromonas-type peptidyl-arginine deiminase,                                                                                                                                                         | hypothetical protein PDIP_63960                       |
| PDIG_42070 | 2.11 |                        |                                         |                                                                                                                                                                                                         | hypothetical protein UCREL1_8844 [Eutypa lata UCREL1] |
| PDIG_39440 | 2.11 | PF00202,               | Aminotran_3,                            | Aminotransferase class-III,                                                                                                                                                                             | hypothetical protein PDIG_39440                       |
| PDIG_66580 | 2.10 |                        |                                         |                                                                                                                                                                                                         | hypothetical protein PDIP_75880                       |
| PDIG_46690 | 2.10 | PF08244,PF00251,       | Glyco_hydro_32C, Glyco_hydro_32N,       | Glycosyl hydrolases family 32 C terminal,Glycosyl hydrolases family 32 N-terminal domain,                                                                                                               | Putative intracellular invertase                      |
| PDIG_04910 | 2.10 | PF07690,               | MFS_1,                                  | Major Facilitator Superfamily,                                                                                                                                                                          | MFS transporter, putative                             |
| PDIG_71680 | 2.08 |                        |                                         |                                                                                                                                                                                                         | Integral membrane protein                             |
| PDIG_15350 | 2.08 | PF00083,               | Sugar_tr,                               | Sugar (and other) transporter, Thiamine pyrophosphate enzyme, N-terminal TPP binding domain,Thiamine pyrophosphate enzyme, central domain,Thiamine pyrophosphate enzyme, C-terminal TPP binding domain, | hypothetical protein PDIG_15350                       |
| PDIG_24110 | 2.07 | PF02776,PF00205,PF0277 | TPP_enzyme_N,TPP_enzyme_M,TPP_enzyme_C, |                                                                                                                                                                                                         | Ankyrin, putative                                     |
| PDIG_36640 | 2.04 | PF01658,PF07994,       | Inos-1-P_synth,NA_D_binding_5,          | Myo-inositol-1-phosphate synthase,Myo-inositol-1-phosphate synthase,                                                                                                                                    | hypothetical protein PDIP_89710                       |
| PDIG_52220 | 2.00 | PF04082,               | Fungal_trans,                           | Fungal specific transcription factor domain,                                                                                                                                                            | hypothetical protein PDIG_52220                       |
| PDIG_48560 | 2.00 | PF00860,               | Xan_ur_permease,                        | Permease family,                                                                                                                                                                                        | Nucleoside transporter, putative                      |
| PDIG_20170 | 1.97 | PF00172,               | Zn_clus,                                | Fungal Zn(2)-Cys(6) binuclear cluster domain,                                                                                                                                                           | hypothetical protein PDIG_20170                       |
| PDIG_33200 | 1.95 | PF01137,               | RTC,                                    | RNA 3'-terminal phosphate cyclase,                                                                                                                                                                      | RNA 3'-terminal phosphate cyclase,                    |

|            |      |             |                   |                                                       |                                                |
|------------|------|-------------|-------------------|-------------------------------------------------------|------------------------------------------------|
| PDIG_58220 | 1.95 | PF02347,    | GDC-P,            | Glycine cleavage system P-protein,                    | putative<br>Glycine dehydrogenase              |
| PDIG_36840 | 1.94 | PF00171,    | Aldedh,           | Aldehyde dehydrogenase family,                        | Aldehyde dehydrogenase                         |
| PDIG_58830 | 1.92 | PF01764,    | Lipase_3,         | Lipase (class 3),                                     | Extracellular triacylglycerol lipase, putative |
| PDIG_79190 | 1.89 | PF13302,    | Acetyltransf_3,   | Acetyltransferase (GNAT) domain,                      | N-acetyltransferase, GNAT family, putative     |
| PDIG_75190 | 1.88 | PF13561,    | adh_short_C2,     | Enoyl-(Acyl carrier protein) reductase,               | hypothetical protein PDIG_75190                |
| PDIG_36960 | 1.88 |             |                   |                                                       | hypothetical protein PDIP_83550                |
| PDIG_89390 | 1.87 |             |                   |                                                       | putative beta-glucosidase btgE                 |
|            |      | PF00580,PF1 | UvrD-helicase,Uvr | UvrD/REP helicase N-terminal domain,UvrD-like         |                                                |
| PDIG_61970 | 1.85 | 3361,       | D_C,              | helicase C-terminal domain,                           | ATP-depentend DNA helicase, putative           |
| PDIG_84160 | 1.85 |             |                   |                                                       | hypothetical protein PDIG_84160                |
| PDIG_33750 | 1.84 | PF05730,    | CFEM,             | CFEM domain,                                          | Extracellular serine-threonine rich protein    |
| PDIG_43030 | 1.84 | PF09334,    | tRNA-synt_1g,     | tRNA synthetases class I (M),                         | Methionyl-tRNA synthetase                      |
| PDIG_61420 | 1.83 | PF00248,    | Aldo_ket_red,     | Aldo/keto reductase family,                           | Aldehyde reductase (GliO), putative            |
| PDIG_34550 | 1.82 |             |                   |                                                       | hypothetical protein PDIP_54110                |
|            |      | PF00291,PF0 |                   | Pyridoxal-phosphate dependent enzyme,Tryptophan       |                                                |
| PDIG_43660 | 1.82 | 0290,       | PALP,Trp_syntA,   | synthase alpha chain,                                 | Bifunctional tryptophan synthase TRPB          |
|            |      | PF00668,PF0 | Condensation,AMP  |                                                       |                                                |
|            |      | 0501,PF0799 | -binding,NAD_bind | Condensation domain,AMP-binding enzyme,Male           |                                                |
| PDIG_53550 | 1.81 | 3,PF00550,  | ing_4,PP-binding, | sterility protein,Phosphopantetheine attachment site, | HC-toxin synthetase                            |
|            |      | PF08029,PF0 |                   | HisG, C-terminal domain,ATP                           |                                                |
| PDIG_48990 | 1.80 | 1634,       | HisG_C,HisG,      | phosphoribosyltransferase,                            | hypothetical protein PDIP_58370                |
| PDIG_49390 | 1.80 |             |                   |                                                       | hypothetical protein PDIG_49390                |
|            |      | PF00078,PF0 |                   | Reverse transcriptase (RNA-dependent DNA              |                                                |
|            |      | 0075,PF1452 | RVT_1,RNase_H,E   | polymerase),RNase H,Endonuclease-reverse              | putative RNA-directed DNA polymerase from      |
| PDIG_38810 | 1.80 | 9,          | xo_endo_phos_2,   | transcriptase,                                        | transposon X-element                           |

|            |      |             |                    |                                                    |                                               |
|------------|------|-------------|--------------------|----------------------------------------------------|-----------------------------------------------|
| PDIG_83720 | 1.80 |             |                    |                                                    | hypothetical protein PDIP_89220               |
|            |      | PF00150,PF0 |                    | Cellulase (glycosyl hydrolase family 5),Fungal     | putative endoglucanase/cellulase 1            |
| PDIG_30830 | 1.80 | 0734,       | Cellulase,CBM_1,   | cellulose binding domain,                          | [ <i>Penicillium digitatum</i> ]              |
| PDIG_23080 | 1.79 | PF04389,    | Peptidase_M28,     | Peptidase family M28,                              | Aminopeptidase, putative                      |
| PDIG_10930 | 1.79 | PF03124,    | EXS,               | EXS family,                                        | Protein-ER retention protein (Erd1), putative |
| PDIG_56600 | 1.78 |             |                    |                                                    | hypothetical protein PDIP_66160               |
|            |      | PF00501,PF0 | AMP-binding,NAD    |                                                    |                                               |
|            |      | 7993,PF0055 | _binding_4,PP-bind | AMP-binding enzyme,Male sterility                  |                                               |
| PDIG_87700 | 1.77 | 0,          | ing,               | protein,Phosphopantetheine attachment site,        | L-aminoadipate-semialdehyde dehydrogenase     |
| PDIG_58110 | 1.76 | PF01699,    | Na_Ca_ex,          | Sodium/calcium exchanger protein,                  | hypothetical protein PDIP_67600               |
| PDIG_06660 | 1.76 | PF00328,    | His_Phos_2,        | Histidine phosphatase superfamily (branch 2),      | Acid phosphatase, putative                    |
|            |      | PF02436,PF0 | PYC_OADA,Biotin    | Conserved carboxylase domain,Biotin carboxylase,   |                                               |
|            |      | 0289,PF0278 | _carb_N,CPSase_L   | N-terminal domain,Carbamoyl-phosphate synthase L   |                                               |
|            |      | 6,PF00364,P | _D2,Biotin_lipoyl, | chain, ATP binding domain,Biotin-requiring         |                                               |
|            |      | F00682,PF02 | HMGL-like,Biotin_  | enzyme,HMGL-like,Biotin carboxylase C-terminal     |                                               |
| PDIG_23790 | 1.75 | 785,        | carb_C,            | domain,                                            | Pyruvate carboxylase, putative                |
| PDIG_48400 | 1.74 | PF01425,    | Amidase,           | Amidase,                                           | Amidase family protein                        |
| PDIG_29590 | 1.74 | PF13520,    | AA_permease_2,     | Amino acid permease,                               | Amino acid permease                           |
| PDIG_76170 | 1.73 | PF07690,    | MFS_1,             | Major Facilitator Superfamily,                     | MFS multidrug transporter, putative           |
| PDIG_72690 | 1.73 | PF01988,    | VIT1,              | VIT family,                                        | Calcium transporter, putative                 |
| PDIG_36170 | 1.73 | PF00445,    | Ribonuclease_T2,   | Ribonuclease T2 family,                            | Ribonuclease T2, putative                     |
| PDIG_00200 | 1.72 | PF13520,    | AA_permease_2,     | Amino acid permease,                               | Choline transporter Hnm1, putative            |
|            |      |             |                    | Carbamoyl-phosphate synthase L chain, ATP binding  |                                               |
|            |      | PF02786,PF0 | CPSase_L_D2,CPS    | domain,Carbamoyl-phosphate synthetase large chain, |                                               |
| PDIG_30210 | 1.72 | 2787,       | ase_L_D3,          | oligomerisation domain,                            | Carbamoyl-phosphate synthase, large subunit   |
| PDIG_00100 | 1.72 |             |                    |                                                    | hypothetical protein PDIG_00100               |

|            |      |                                                 |                                                                       |                                                                                                                                                                                                                |                                                                |
|------------|------|-------------------------------------------------|-----------------------------------------------------------------------|----------------------------------------------------------------------------------------------------------------------------------------------------------------------------------------------------------------|----------------------------------------------------------------|
| PDIG_84670 | 1.70 | PF13358,PF01498,                                | DDE_3,HTH_Tnp_Tc3_2,                                                  | DDE superfamily endonuclease,Transposase, FAD binding domain in molybdopterin dehydrogenase,CO dehydrogenase flavoprotein                                                                                      | Transposable element tc3 transposase, putative                 |
| PDIG_87680 | 1.70 | PF00941,PF03450,PF00111,PF01799,PF01315,PF0738, | FAD_binding_5,C O_deh_flav_C,Fer2 ,Fer2_2,Ald_Xan_dh_C,Ald_Xan_dh_C2, | C-terminal domain,2Fe-2S iron-sulfur cluster binding domain,[2Fe-2S] binding domain,Aldehyde oxidase and xanthine dehydrogenase, a/b hammerhead domain,Molybdopterin-binding domain of aldehyde dehydrogenase, | Xanthine dehydrogenase HxA, putative                           |
| PDIG_38950 | 1.69 | PF00464,                                        | SHMT,                                                                 | Serine hydroxymethyltransferase,                                                                                                                                                                               | Serine hydroxymethyltransferase                                |
| PDIG_37200 | 1.69 | PF04193,                                        | PQ-loop,                                                              | PQ loop repeat,                                                                                                                                                                                                | L-cystine transporter, putative                                |
| PDIG_25890 | 1.66 | PF00328,                                        | His_Phos_2,                                                           | Histidine phosphatase superfamily (branch 2),                                                                                                                                                                  | hypothetical protein PDIP_60370                                |
| PDIG_52230 | 1.66 |                                                 |                                                                       |                                                                                                                                                                                                                | hypothetical protein PDIG_52230                                |
| PDIG_42900 | 1.66 |                                                 |                                                                       |                                                                                                                                                                                                                | hypothetical protein PDIG_42900                                |
| PDIG_00610 | 1.64 |                                                 |                                                                       |                                                                                                                                                                                                                | hypothetical protein PDIG_00610                                |
| PDIG_32580 | 1.63 | PF03987,PF03986,PF10381,                        | Autophagy_act_C, Autophagy_N,Auto phagy_C,                            | Autophagocytosis associated protein, active-site domain,Autophagocytosis associated protein (Atg3), N-terminal domain,Autophagocytosis associated protein C-terminal,                                          | Autophagy-related protein 3                                    |
| PDIG_29740 | 1.63 | PF04139,                                        | Rad9,                                                                 | Rad9,                                                                                                                                                                                                          | DNA repair protein rad9, putative                              |
| PDIG_32620 | 1.61 | PF01960,                                        | ArgJ,                                                                 | ArgJ family,                                                                                                                                                                                                   | Arginine biosynthesis bifunctional protein ArgJ, mitochondrial |
| PDIG_03870 | 1.60 | PF07690,                                        | MFS_1,                                                                | Major Facilitator Superfamily,                                                                                                                                                                                 | Amine transporter, putative                                    |
| PDIG_14050 | 1.60 |                                                 |                                                                       |                                                                                                                                                                                                                | hypothetical protein PDIP_39700                                |
| PDIG_01380 | 1.59 |                                                 |                                                                       |                                                                                                                                                                                                                | hypothetical protein PDIG_01380                                |
| PDIG_34980 | 1.58 | PF03856,                                        | SUN,                                                                  | Beta-glucosidase (SUN family),                                                                                                                                                                                 | hypothetical protein PDIP_54540                                |

|            |      |             |                  |                                                                                       |                                                                                        |
|------------|------|-------------|------------------|---------------------------------------------------------------------------------------|----------------------------------------------------------------------------------------|
| PDIG_60710 | 1.57 | PF04082,    | Fungal_trans,    | Fungal specific transcription factor domain,                                          | hypothetical protein PDIP_70140                                                        |
| PDIG_84130 | 1.55 |             |                  |                                                                                       | hypothetical protein PDIG_84130                                                        |
| PDIG_59840 | 1.54 |             |                  |                                                                                       | hypothetical protein PDIP_69260                                                        |
|            |      | PF07983,PF0 | X8,Glyco_hydro_7 |                                                                                       |                                                                                        |
| PDIG_82710 | 1.54 | 3198,       | 2,               | X8 domain,Glucanosyltransferase,                                                      | 1,3-beta-glucanosyltransferase gel4                                                    |
| PDIG_46700 | 1.53 | PF00083,    | Sugar_tr,        | Sugar (and other) transporter,                                                        | hypothetical protein PDIG_46700                                                        |
| PDIG_51830 | 1.53 | PF07690,    | MFS_1,           | Major Facilitator Superfamily,                                                        | hypothetical protein PDIG_51830                                                        |
| PDIG_85440 | 1.52 | PF05699,    | Dimer_Tnp_hAT,   | hAT family C-terminal dimerisation region,                                            | hypothetical protein PDIG_86160                                                        |
| PDIG_86160 | 1.52 | PF05699,    | Dimer_Tnp_hAT,   | hAT family C-terminal dimerisation region,                                            | hypothetical protein PDIG_86160                                                        |
| PDIG_43040 | 1.51 | PF09811,    | Yae1_N,          | Essential protein Yae1, N terminal,                                                   | hypothetical protein PDIG_43040                                                        |
| PDIG_76200 | 1.50 | PF01490,    | Aa_trans,        | Transmembrane amino acid transporter protein,                                         | hypothetical protein PDIG_76200                                                        |
| PDIG_81100 | 1.50 |             |                  |                                                                                       | hypothetical protein PDIG_81100                                                        |
| PDIG_48000 | 1.49 | PF13816,    | Dehydratase_hem, | Haem-containing dehydratase,                                                          | hypothetical protein PDIP_57380                                                        |
| PDIG_62410 | 1.48 | PF00083,    | Sugar_tr,        | Sugar (and other) transporter,                                                        | hypothetical protein PDIG_62410                                                        |
| PDIG_57670 | 1.47 | PF03856,    | SUN,             | Beta-glucosidase (SUN family),<br>Glycosyltransferase sugar-binding region containing | SUN family protein, putative                                                           |
| PDIG_29110 | 1.47 | PF04488,    | Gly_transf_sug,  | DXD motif,                                                                            | SNARE complex subunit (Vam7)                                                           |
| PDIG_81560 | 1.47 |             |                  |                                                                                       | hypothetical protein PDIG_81560                                                        |
| PDIG_72760 | 1.47 |             |                  |                                                                                       | hypothetical protein PDIG_72760                                                        |
| PDIG_54660 | 1.47 | PF13813,    | MBOAT_2,         | Membrane bound O-acyl transferase family,                                             | hypothetical protein PDIG_54660                                                        |
| PDIG_17220 | 1.46 | PF00328,    | His_Phos_2,      | Histidine phosphatase superfamily (branch 2),                                         | hypothetical protein PDIP_55120                                                        |
| PDIG_19570 | 1.46 | PF01501,    | Glyco_transf_8,  | Glycosyl transferase family 8,<br>NADH:flavin oxidoreductase / NADH oxidase           | hypothetical protein PDIG_19570                                                        |
| PDIG_87790 | 1.45 | PF00724,    | Oxidored_FMN,    | family,                                                                               | 12-oxophytodienoate reductase, putative<br>hypothetical protein PDE_04219 [Penicillium |
| PDIG_44840 | 1.44 | PF00120,    | Gln-synt_C,      | Glutamine synthetase, catalytic domain,                                               | oxalicum 114-2]                                                                        |

|            |      |                                        |                                               |                                                                                                                 |                                                                                                               |
|------------|------|----------------------------------------|-----------------------------------------------|-----------------------------------------------------------------------------------------------------------------|---------------------------------------------------------------------------------------------------------------|
| PDIG_09300 | 1.44 | PF07690,<br>PF00076,PF1                | MFS_1,                                        | Major Facilitator Superfamily,<br>RNA recognition motif. (a.k.a. RRM, RBD, or RNP                               | Efflux pump antibiotic resistance protein,<br>putative                                                        |
| PDIG_83180 | 1.44 | 0378,                                  | RRM_1,RRM,                                    | domain),Putative RRM domain,                                                                                    | Differentiation regulator (Nrd1), putative                                                                    |
| PDIG_25990 | 1.43 | PF02115,<br>PF00005,PF0<br>6422,PF1451 | Rho_GDI,<br>ABC_tran,PDR_C<br>DR,ABC_trans_N, | RHO protein GDP dissociation inhibitor,<br>ABC transporter,CDR ABC<br>transporter,ABC-transporter extracellular | hypothetical protein PDIG_25990                                                                               |
| PDIG_45710 | 1.43 | 0,PF01061,                             | ABC2_membrane,                                | N-terminal,ABC-2 type transporter,                                                                              | ABC drug exporter AtrF                                                                                        |
| PDIG_48040 | 1.42 | PF00995,                               | Sec1,                                         | Sec1 family,                                                                                                    | Sec1 family superfamily                                                                                       |
| PDIG_68550 | 1.42 | PF01975,                               | SurE,                                         | Survival protein SurE,                                                                                          | hypothetical protein PDIP_77840                                                                               |
| PDIG_18030 | 1.42 | PF01704,                               | UDPGP,                                        | UTP--glucose-1-phosphate uridylyltransferase,                                                                   | UTP-glucose-1-phosphate uridylyltransferase<br>Ugp1, putative                                                 |
| PDIG_66590 | 1.41 | PF01979,                               | Amidohydro_1,                                 | Amidohydrolase family,                                                                                          | Allantoinase Dal1, putative                                                                                   |
| PDIG_63100 | 1.41 | PF00141,                               | peroxidase,                                   | Peroxidase,                                                                                                     | Cytochrome c peroxidase Ccp1, putative<br>2-amino-3-carboxymuconate-6-semialdehyde<br>decarboxylase, putative |
| PDIG_24730 | 1.40 | PF04909,                               | Amidohydro_2,                                 | Amidohydrolase,                                                                                                 | Phosphoglycerate kinase                                                                                       |
| PDIG_41940 | 1.40 | PF00162,                               | PGK,                                          | Phosphoglycerate kinase,                                                                                        | Phosphoglycerate kinase                                                                                       |
| PDIG_33290 | 1.39 | PF11735,                               | CAP59_mtransfer,                              | Cryptococcal mannosyltransferase 1,                                                                             | hypothetical protein PDIP_52870                                                                               |
| PDIG_65920 | 1.39 | PF00910,                               | RNA_helicase,                                 | RNA helicase,                                                                                                   | Para-Rep C2                                                                                                   |
| PDIG_70000 | 1.38 | PF00320,<br>PF00005,PF0                | GATA,<br>ABC_tran,ABC_m                       | GATA zinc finger,<br>ABC transporter,ABC transporter transmembrane                                              | GATA transcription factor                                                                                     |
| PDIG_16670 | 1.38 | 0664,                                  | embrane,                                      | region,                                                                                                         | hypothetical protein PDIP_88180                                                                               |
| PDIG_37590 | 1.37 | PF00326,                               | Peptidase_S9,                                 | Prolyl oligopeptidase family,                                                                                   | Dipeptidyl-peptidase 5                                                                                        |
| PDIG_32180 | 1.37 | PF00735,                               | Septin,                                       | Septin,                                                                                                         | Septin AspA, putative                                                                                         |
| PDIG_77560 | 1.37 | PF03169,                               | OPT,                                          | OPT oligopeptide transporter protein,                                                                           | hypothetical protein PDIG_77560                                                                               |
| PDIG_73820 | 1.36 | PF04061,                               | ORMDL,                                        | ORMDL family,                                                                                                   | Unfolded protein response Orm1, putative                                                                      |



|            |      |                         |                                  |                                                                                                                        |                                                            |
|------------|------|-------------------------|----------------------------------|------------------------------------------------------------------------------------------------------------------------|------------------------------------------------------------|
| PDIG_66140 | 1.36 | PF00025,<br>PF00009,PF0 | Arf,<br>GTP_EFTU,GTP_            | ADP-ribosylation factor family,<br>Elongation factor Tu GTP binding                                                    | ADP-ribosylation factor 6, putative                        |
| PDIG_10720 | 1.36 | 3143,                   | EFTU_D3,                         | domain,Elongation factor Tu C-terminal domain,                                                                         | hypothetical protein PDIP_82230                            |
| PDIG_75470 | 1.35 | PF02990,                | EMP70,                           | Endomembrane protein 70,                                                                                               | Multispanning membrane protein, putative                   |
| PDIG_31170 | 1.35 |                         |                                  |                                                                                                                        | hypothetical protein PDIP_50750                            |
| PDIG_13820 | 1.35 |                         |                                  |                                                                                                                        | hypothetical protein PDIP_39470                            |
| PDIG_22520 | 1.35 |                         |                                  |                                                                                                                        | hypothetical protein PDIG_22520                            |
| PDIG_48030 | 1.34 | PF00271,PF1<br>2513,    | Helicase_C,SUV3_<br>C,           | Helicase conserved C-terminal domain,Mitochondrial<br>degradosome RNA helicase subunit C terminal,                     | Mitochondrial ATP-dependent RNA helicase<br>Suv3, putative |
| PDIG_81970 | 1.34 | PF03447,PF0<br>0742,    | NAD_binding_3,H<br>omoserine_dh, | Homoserine dehydrogenase, NAD binding<br>domain,Homoserine dehydrogenase,<br>NADH:flavin oxidoreductase / NADH oxidase | Homoserine dehydrogenase                                   |
| PDIG_76610 | 1.33 | PF00724,                | Oxidored_FMN,                    | family,                                                                                                                | NADH oxidase                                               |
| PDIG_25020 | 1.33 | PF00169,<br>PF14698,PF0 | PH,<br>PH,                       | PH domain,                                                                                                             | hypothetical protein PDIG_25020                            |
| PDIG_90060 | 1.33 | 0206,                   | ASL_C2,Lyase_1,                  | Argininosuccinate lyase C-terminal,Lyase,                                                                              | Argininosuccinate lyase                                    |
| PDIG_62770 | 1.32 |                         |                                  |                                                                                                                        | hypothetical protein PDIP_72150                            |
| PDIG_03510 | 1.32 | PF00795,                | CN_hydrolase,                    | Carbon-nitrogen hydrolase,                                                                                             | Nitrilase, putative                                        |
| PDIG_81980 | 1.31 | PF11927,                | DUF3445,                         | Protein of unknown function (DUF3445),                                                                                 | hypothetical protein PDIG_81980                            |
| PDIG_78350 | 1.31 | PF14604,                | SH3_9,                           | Variant SH3 domain,                                                                                                    | hypothetical protein PDIG_78350                            |
| PDIG_21170 | 1.31 | PF01263,                | Aldose_epim,                     | Aldose 1-epimerase,                                                                                                    | Aldose 1-epimerase, putative                               |
| PDIG_52240 | 1.31 | PF05277,                | DUF726,                          | Protein of unknown function (DUF726),                                                                                  | hypothetical protein PDIG_52240                            |
| PDIG_40960 | 1.31 | PF07690,                | MFS_1,                           | Major Facilitator Superfamily,                                                                                         | MFS transporter (Mch2), putative                           |
| PDIG_78430 | 1.31 | PF13520,                | AA_permease_2,                   | Amino acid permease,                                                                                                   | GabA permease, putative                                    |
| PDIG_25160 | 1.30 |                         |                                  |                                                                                                                        | hypothetical protein PDIP_59650                            |
| PDIG_77890 | 1.30 | PF12223,                | DUF3602,                         | Protein of unknown function (DUF3602),                                                                                 | hypothetical protein PDIG_77890                            |

|            |      |             |                   |                                                    |                                              |
|------------|------|-------------|-------------------|----------------------------------------------------|----------------------------------------------|
| PDIG_62540 | 1.29 | PF00245,    | Alk_phosphatase,  | Alkaline phosphatase,                              | Alkaline phosphatase                         |
| PDIG_46330 | 1.27 | PF03641,    | Lysine_decarbox,  | Possible lysine decarboxylase,                     | hypothetical protein PDIG_46330              |
|            |      | PF09333,PF1 | ATG_C,ATG2_CA     | Autophagy-related protein C terminal               |                                              |
| PDIG_74520 | 1.27 | 3329,       | D,                | domain,Autophagy-related protein 2 CAD motif,      | Autophagy regulatory protein Atg2, putative  |
| PDIG_70690 | 1.27 | PF03928,    | Haem_degrading,   | Haem-degrading,                                    | hypothetical protein PDIP_80010              |
| PDIG_74530 | 1.27 | PF00962,    | A_deaminase,      | Adenosine/AMP deaminase,                           | CECR1 family adenosine deaminase, putative   |
| PDIG_40560 | 1.26 | PF03169,    | OPT,              | OPT oligopeptide transporter protein,              | Oligopeptide transporter, putative           |
| PDIG_25030 | 1.26 | PF00892,    | EamA,             | EamA-like transporter family,                      | Integral membrane protein, putative          |
|            |      | PF00133,PF0 | tRNA-synt_1,Antic | tRNA synthetases class I (I, L, M and              | hypothetical protein DACRYDRAFT_20729        |
| PDIG_57890 | 1.26 | 8264,       | odon_1,           | V),Anticodon-binding domain of tRNA,               | [Dacryopinax sp. DJM-731 SS1]                |
|            |      |             |                   |                                                    | Oxidoreductase, 2OG-Fe(II) oxygenase         |
| PDIG_24940 | 1.25 | PF03171,    | 2OG-FeII_Oxy,     | 2OG-Fe(II) oxygenase superfamily,                  | family, putative                             |
| PDIG_18840 | 1.25 | PF07217,    | Het-C,            | Heterokaryon incompatibility protein Het-C,        | NIMA-interacting protein TinC                |
| PDIG_44850 | 1.25 | PF01274,    | Malate_synthase,  | Malate synthase,                                   | Malate synthase                              |
| PDIG_27140 | 1.25 | PF07690,    | MFS_1,            | Major Facilitator Superfamily,                     | MFS transporter, putative                    |
| PDIG_79150 | 1.25 | PF07690,    | MFS_1,            | Major Facilitator Superfamily,                     | Protein HOL1, putative                       |
| PDIG_68500 | 1.24 | PF00171,    | Aldedh,           | Aldehyde dehydrogenase family,                     | Aldehyde dehydrogenase, putative             |
|            |      |             |                   |                                                    | Pc21g07950 [Penicillium chrysogenum          |
| PDIG_24560 | 1.24 | PF07690,    | MFS_1,            | Major Facilitator Superfamily,                     | Wisconsin 54-1255]                           |
| PDIG_84660 | 1.24 | PF01490,    | Aa_trans,         | Transmembrane amino acid transporter protein,      | Transporter, putative                        |
| PDIG_10550 | 1.23 | PF00026,    | Asp,              | Eukaryotic aspartyl protease,                      | Aspartic protease pep1                       |
| PDIG_64720 | 1.23 | PF00503,    | G-alpha,          | G-protein alpha subunit,                           | G protein complex alpha subunit GanA         |
| PDIG_66000 | 1.22 |             |                   |                                                    | pH-response transcription factor pacC/RIM101 |
| PDIG_58180 | 1.22 | PF05577,    | Peptidase_S28,    | Serine carboxypeptidase S28,                       | Serine peptidase, family S28, putative       |
|            |      | PF03950,PF0 | tRNA-synt_1c_C,t  | tRNA synthetases class I (E and Q), anti-codon     |                                              |
| PDIG_59830 | 1.22 | 0749,       | RNA-synt_1c,      | binding domain,tRNA synthetases class I (E and Q), | Glutaminyl-tRNA synthetase                   |

|            |      |             |                   |                                               |                                                              |
|------------|------|-------------|-------------------|-----------------------------------------------|--------------------------------------------------------------|
|            |      |             |                   | catalytic domain,                             |                                                              |
| PDIG_04490 | 1.22 |             |                   |                                               | hypothetical protein PDIG_04490                              |
|            |      | PF00735,PF0 |                   |                                               | hypothetical protein THITE_2108385                           |
| PDIG_54050 | 1.22 | 0400,       | Septin,WD40,      | Septin,WD domain, G-beta repeat,              | [Thielavia terrestris NRRL 8126]                             |
| PDIG_61960 | 1.22 | PF03069,    | FmdA_AmdA,        | Acetamidase/Formamidase family,               | Acetamidase/formamidase family protein                       |
| PDIG_53280 | 1.21 | PF04502,    | DUF572,           | Family of unknown function (DUF572),          | MRNA splicing protein Yju2                                   |
| PDIG_79030 | 1.21 |             |                   |                                               | Ammonium transporter (Mep2), putative                        |
| PDIG_31160 | 1.21 | PF00561,    | Abhydrolase_1,    | alpha/beta hydrolase fold,                    | Homoserine O-acetyltransferase, putative                     |
| PDIG_52420 | 1.21 | PF00328,    | His_Phos_2,       | Histidine phosphatase superfamily (branch 2), | Phytase                                                      |
| PDIG_56670 | 1.21 | PF07690,    | MFS_1,            | Major Facilitator Superfamily,                | MFS allantoate transporter, putative                         |
| PDIG_09390 | 1.20 |             |                   |                                               | hypothetical protein PDIG_09390                              |
| PDIG_33490 | 1.20 | PF04982,    | HPP,              | HPP family,                                   | HPP family protein                                           |
| PDIG_32110 | 1.20 | PF00561,    | Abhydrolase_1,    | alpha/beta hydrolase fold,                    | hypothetical protein PDIP_51690                              |
|            |      |             |                   |                                               | Short-chain dehydrogenase/reductase family protein, putative |
| PDIG_44830 | 1.20 | PF13561,    | adh_short_C2,     | Enoyl-(Acyl carrier protein) reductase,       | hypothetical protein PDIP_77940                              |
| PDIG_68650 | 1.20 | PF01266,    | DAO,              | FAD dependent oxidoreductase,                 | HPP family protein                                           |
| PDIG_68180 | 1.19 | PF04982,    | HPP,              | HPP family,                                   | Glycine cleavage system H protein                            |
| PDIG_67510 | 1.19 | PF01597,    | GCV_H,            | Glycine cleavage H-protein,                   | hypothetical protein PDIG_15680                              |
| PDIG_15680 | 1.19 |             |                   |                                               | Extracellular metalloprotease [Penicillium digitatum Pd1]    |
| PDIG_43170 | 1.19 | PF05572,    | Peptidase_M43,    | Pregnancy-associated plasma protein-A,        | Kinesin family protein (KinA), putative                      |
| PDIG_76030 | 1.19 | PF00225,    | Kinesin,          | Kinesin motor domain,                         |                                                              |
|            |      | PF09286,PF0 | Pro-kuma_activ,Pe | Pro-kumamolisin, activation domain,Subtilase  |                                                              |
| PDIG_67780 | 1.19 | 0082,       | ptidase_S8,       | family,                                       | Tripeptidyl-peptidase sed2                                   |
| PDIG_03210 | 1.19 | PF00735,    | Septin,           | Septin,                                       | hypothetical protein PDIP_41870                              |
| PDIG_31760 | 1.19 | PF07855,    | DUF1649,          | Protein of unknown function (DUF1649),        | hypothetical protein AN2280.2 [Aspergillus                   |

|            |      |             |                    |                                                    |
|------------|------|-------------|--------------------|----------------------------------------------------|
|            |      |             |                    | nidulans FGSC A4]                                  |
|            |      | PF03456,PF0 |                    |                                                    |
|            |      | 2141,PF0345 | uDENN,DENN,dD      | uDENN domain,DENN (AEX-3) domain,dDENN             |
| PDIG_02540 | 1.18 | 5,          | ENN,               | domain,                                            |
|            |      | PF08303,PF0 | tRNA_lig_kinase,t  |                                                    |
|            |      | 8302,PF0951 | RNA_lig_CPD,RN     | tRNA ligase kinase domain,Fungal tRNA ligase       |
| PDIG_13280 | 1.18 | 1,          | A_lig_T4_1,        | phosphodiesterase domain,RNA ligase,               |
|            |      | PF00668,PF0 | Condensation,PP-bi |                                                    |
|            |      | 0550,PF0050 | nding,AMP-binding  | Condensation domain,Phosphopantetheine             |
| PDIG_09960 | 1.18 | 1,          | ,                  | attachment site,AMP-binding enzyme,                |
| PDIG_24450 | 1.18 | PF01008,    | IF-2B,             | Initiation factor 2 subunit family,                |
| PDIG_69380 | 1.18 | PF13302,    | Acetyltransf_3,    | Acetyltransferase (GNAT) domain,                   |
| PDIG_89580 | 1.18 | PF04082,    | Fungal_trans,      | Fungal specific transcription factor domain,       |
| PDIG_67970 | 1.18 | PF00545,    | Ribonuclease,      | ribonuclease,                                      |
| PDIG_69240 | 1.16 |             |                    |                                                    |
|            |      |             | Sirohm_synth_C,Si  | Sirohaem biosynthesis protein C-terminal,Sirohaem  |
|            |      | PF14823,PF1 | rohm_synth_M,NA    | biosynthesis protein central,Putative              |
|            |      | 4824,PF1324 | D_binding_7,TP_m   | NAD(P)-binding,Tetrapyrrole (Corrin/Porphyrin)     |
| PDIG_04450 | 1.16 | 1,PF00590,  | ethylase,          | Methylases,                                        |
| PDIG_80280 | 1.15 | PF09816,    | EAF,               | RNA polymerase II transcription elongation factor, |
| PDIG_44730 | 1.15 | PF14661,    | HAUS6_N,           | HAUS augmin-like complex subunit 6 N-terminus,     |
| PDIG_29320 | 1.15 | PF01764,    | Lipase_3,          | Lipase (class 3),                                  |
| PDIG_14140 | 1.15 | PF03198,    | Glyco_hydro_72,    | Glucanoyltransferase,                              |
|            |      |             |                    | Acetohydroxy acid isomeroreductase, catalytic      |
|            |      | PF01450,PF0 |                    | domain,Acetohydroxy acid isomeroreductase,         |
| PDIG_22110 | 1.15 | 7991,       | IlvC,IlvN,         | NADPH-binding domain,                              |

nidulans FGSC A4]

hypothetical protein PDIG\_02540

TRNA ligase

HC-toxin synthetase

hypothetical protein PDIP\_58930

hypothetical protein PDIP\_78670

C6 transcription factor, putative

hypothetical protein PDIP\_77270

hypothetical protein PDIP\_78530

Siroheme synthase, putative

hypothetical protein PDIG\_80280

hypothetical protein PDIG\_44730

Autophagy related lipase Atg15, putative

1,3-beta-glucanoyltransferase gel2

Ketol-acid reductoisomerase

|            |      |                        |                                |                                                                                                                   |                                                                               |
|------------|------|------------------------|--------------------------------|-------------------------------------------------------------------------------------------------------------------|-------------------------------------------------------------------------------|
| PDIG_22850 | 1.14 | PF00884,PF04987,       | Sulfatase,PigN,                | Sulfatase,Phosphatidylinositolglycan class N (PIG-N),<br>NAT, N-acetyltransferase, of N-acetylglutamate synthase, | GPI ethanolamine phosphate transferase 1                                      |
| PDIG_47340 | 1.14 | PF04768,               | NAT,                           |                                                                                                                   | Amino-acid acetyltransferase, mitochondrial                                   |
| PDIG_58340 | 1.14 | PF05291,               | Bystin,                        | Bystin,                                                                                                           | RRNA processing protein Bystin, putative                                      |
| PDIG_35580 | 1.13 | PF10415,PF0206,        | FumaraseC_C,Lyas e_1,          | Fumarase C C-terminus,Lyase,                                                                                      | Fumarate hydratase                                                            |
| PDIG_17480 | 1.13 | PF00854,               | PTR2,                          | POT family,                                                                                                       | MFS peptide transporter Ptr2, putative                                        |
| PDIG_80900 | 1.13 | PF10233,               | Cg6151-P,                      | Uncharacterized conserved protein CG6151-P,                                                                       | Clathrin-coated vesicle protein, putative                                     |
| PDIG_85660 | 1.13 | PF00884,               | Sulfatase,                     | Sulfatase,                                                                                                        | hypothetical protein PDIG_85660                                               |
| PDIG_86490 | 1.12 | PF03372,               | Exo_endo_phos,                 | Endonuclease/Exonuclease/phosphatase family,                                                                      | Sphingomyelinase family protein, putative                                     |
| PDIG_78380 | 1.12 | PF03169,               | OPT,                           | OPT oligopeptide transporter protein,                                                                             | Oligonucleotide transporter<br>20S cyclosome subunit (APC1/BimE),<br>putative |
| PDIG_19560 | 1.12 | PF12859,               | ANAPC1,                        | Anaphase-promoting complex subunit 1,                                                                             |                                                                               |
| PDIG_33890 | 1.12 | PF01406,               | tRNA-synt_1e,                  | tRNA synthetases class I (C) catalytic domain,                                                                    | Cysteinyl-tRNA synthetase                                                     |
| PDIG_17390 | 1.12 | PF03676,               | UPF0183,                       | Uncharacterised protein family (UPF0183),                                                                         | hypothetical protein PDIP_55290                                               |
| PDIG_89550 | 1.12 | PF03876,PF0575,        | SHS2_Rpb7-N,S1,                | SHS2 domain found in N terminus of<br>Rpb7p/Rpc25p/MJ0397,S1 RNA binding domain,                                  | Pc12g03390 [Penicillium chrysogenum<br>Wisconsin 54-1255]                     |
| PDIG_46580 | 1.12 | PF01926,PF12631,PF1039 | MMR_HSR1,Mnm E_helical,TrmE_N, | 50S ribosome-binding GTPase,MnmE helical domain,GTP-binding protein TrmE N-terminus,                              | Mitochondrial GTPase (Mss1), putative                                         |
| PDIG_30890 | 1.12 | PF00202,               | Aminotran_3,                   | Aminotransferase class-III,                                                                                       | 4-aminobutyrate transaminase                                                  |
| PDIG_84170 | 1.11 | PF00083,               | Sugar_tr,                      | Sugar (and other) transporter,                                                                                    | MFS myo-inositol transporter, putative                                        |
| PDIG_27090 | 1.11 | PF05653,               | Mg_trans_NIPA,                 | Magnesium transporter NIPA,                                                                                       | hypothetical protein PDIP_61530                                               |
| PDIG_57150 | 1.11 |                        |                                |                                                                                                                   | hypothetical protein PDIP_66690                                               |
| PDIG_76110 | 1.11 | PF02872,PF0            | 5_nucleotid_C,Met              | 5'-nucleotidase, C-terminal domain,Calcineurin-like                                                               | 5'-nucleotidase, putative                                                     |

|            |      |             |                  |                                                       |                                             |
|------------|------|-------------|------------------|-------------------------------------------------------|---------------------------------------------|
|            |      | 0149,       | allophos,        | phosphoesterase,                                      |                                             |
| PDIG_39770 | 1.11 |             |                  |                                                       | hypothetical protein PDIG_39770             |
| PDIG_61880 | 1.11 |             |                  |                                                       | Allergen Asp f 4                            |
| PDIG_34910 | 1.11 | PF02265,    | S1-P1_nuclease,  | S1/P1 Nuclease,                                       | Nuclease PA3, putative                      |
| PDIG_15690 | 1.10 |             |                  |                                                       | hypothetical protein PDIG_15690             |
|            |      | PF12063,PF0 |                  | Domain of unknown function (DUF3543),Protein          | Serine/threonine protein kinase (Pdd7p),    |
| PDIG_63150 | 1.10 | 0069,       | DUF3543,Pkinase, | kinase domain,                                        | putative                                    |
| PDIG_69990 | 1.10 | PF06813,    | Nodulin-like,    | Nodulin-like,                                         | hypothetical protein PDIP_79290             |
| PDIG_62340 | 1.09 | PF08229,    | SHR3_chaperone,  | ER membrane protein SH3,                              | Secretory component protein shr3, putative  |
| PDIG_59710 | 1.09 | PF00677,    | Lum_binding,     | Lumazine binding domain,                              | Riboflavin synthase, alpha subunit          |
| PDIG_06560 | 1.09 | PF00171,    | Aldedh,          | Aldehyde dehydrogenase family,                        | Aldehyde dehydrogenase                      |
|            |      | PF10397,PF0 |                  |                                                       |                                             |
| PDIG_88650 | 1.09 | 0206,       | ADSL_C,Lyase_1,  | Adenylosuccinate lyase C-terminus,Lyase,              | Adenylosuccinate lyase Ade13, putative      |
|            |      | PF00117,PF0 |                  | Glutamine amidotransferase                            |                                             |
| PDIG_30980 | 1.09 | 0988,       | GATase,CPSase_s  | class-I,Carbamoyl-phosphate synthase small chain,     | Carbamoyl-phosphate synthase, small subunit |
| PDIG_14060 | 1.08 |             | m_chain,         | CPSase domain,                                        | hypothetical protein PDIP_39710             |
|            |      |             |                  |                                                       | Phospho-2-dehydro-3-deoxyheptonate          |
| PDIG_28630 | 1.08 | PF00793,    | DAHP_synth_1,    | DAHP synthetase I family,                             | aldolase, phenylalanine-inhibited           |
|            |      |             |                  | Stretch-activated Ca <sup>2+</sup> -permeable channel |                                             |
| PDIG_84840 | 1.08 | PF12929,    | Mid1,            | component,                                            | Calcium channel subunit Mid1                |
| PDIG_15670 | 1.08 |             |                  |                                                       | hypothetical protein PDIG_15670             |
|            |      |             |                  |                                                       | Hsp70 family chaperone Lhs1/Orp150,         |
| PDIG_36020 | 1.07 | PF00012,    | HSP70,           | Hsp70 protein,                                        | putative                                    |
| PDIG_66320 | 1.07 | PF00152,    | tRNA-synt_2,     | tRNA synthetases class II (D, K and N),               | Aspartyl-tRNA synthetase Dps1, putative     |
